# Supplementary material for: Cation radicals, borenium cations, and a dication from the oxidation of B-tolyl B III subporphyrins
Source: Royal Society of Chemistry journal article supplement (doi:10.1039/d4qo02291b), 2025-01-01
Supplement: d4qo02291b1.pdf [file d4qo02291b1.pdf]

## Supporting Information

### Cation Radicals, Borenium Cations, and Dication from Oxidation of B-Tolyl B<sup>III</sup> Subporphyrins

Zixuan Xie,<sup>‡a</sup> Xiaoheng Ji,<sup>‡a</sup> Xu Zeng,<sup>a</sup> Daiki Shimizu,<sup>b</sup> Takayuki Tanaka,<sup>c</sup> Yutao Rao,<sup>a</sup> Mingbo Zhou,<sup>a</sup> Ling Xu,<sup>\*a</sup> Atsuhiko Osuka<sup>\*a</sup> and Jianxin Song<sup>\*a</sup>

<sup>a</sup> Key Laboratory of Chemical Biology and Traditional Chinese Medicine Research (Ministry of Education of China), Key Laboratory of the Assembly and Application of Organic Functional molecules of Hunan Province, College of Chemistry and Chemical Engineering, Hunan Normal University, Changsha 410081 (China). E-mail: xulingchem@hunnu.edu.cn; atsuhiroosuka@hunnu.edu.cn; jxsong@hunnu.edu.cn

<sup>b</sup> Department of Synthetic Chemistry and Biological Chemistry, Graduate School of Engineering, Kyoto University, Nishikyo-ku, Kyoto 615-8510 (Japan)

<sup>c</sup> Department of Molecular Engineering, Graduate School of Engineering, Kyoto University, Nishikyo-ku, Kyoto 615-8195 (Japan)

<sup>‡</sup> These authors contributed equally.

## Contents

|                                                                          |      |
|--------------------------------------------------------------------------|------|
| <b>1. Instruments and Materials</b> .....                                | S3   |
| <b>2. Experimental Procedures</b> .....                                  | S3   |
| <b>3. Copy of <sup>1</sup>H NMR and <sup>13</sup>C NMR spectra</b> ..... | S11  |
| <b>4. UV-Vis-NIR Absorption Spectra</b> .....                            | S28  |
| <b>5. X-ray Crystallographic Data</b> .....                              | S31  |
| <b>6. Copy of MALDI-TOF-MS</b> .....                                     | S51  |
| <b>7. Cyclic Voltammetry and Differential Pulse Voltammogram</b> .....   | S59  |
| <b>8. Copy of EPR Spectra</b> .....                                      | S64  |
| <b>9. DFT Calculations</b> .....                                         | S65  |
| <b>10. References</b> .....                                              | S118 |

## 1. Instruments and Materials

$^1\text{H}$  NMR (700 MHz) and  $^{13}\text{C}$  NMR (176 MHz) were taken on a Bruker AVANCE NEO spectrometer,  $^{13}\text{C}$  NMR (101 MHz) were taken on a Bruker AVANCE-400 spectrometer,  $^1\text{H}$  NMR (500 MHz) and  $^{13}\text{C}$  NMR (126 MHz) spectra were taken on a Bruker AVANCE-500 spectrometer or a Q.One Instruments Quantum-I spectrometer. Chemical shifts were reported as the delta scale in ppm relative to the internal standards for  $\text{CHCl}_3$  ( $\delta = 7.26$  ppm for  $^1\text{H}$  NMR and 77.16 ppm for  $^{13}\text{C}$  NMR) and  $\text{CH}_2\text{Cl}_2$  ( $\delta = 5.32$  ppm for  $^1\text{H}$  NMR and 53.84 ppm for  $^{13}\text{C}$  NMR). UV-Vis-NIR absorption spectra were recorded on a Shimadzu UV-3600 spectrometer. MALDI-TOF mass spectra were obtained with a Bruker ultrafleXtreme MALDI-TOF/TOF spectrometer with DCTB as matrix. X-Ray data were taken on an Agilent Supernova X-Ray diffractometer equipped with a large area CCD detector. Redox potentials were measured by cyclic voltammetry and differential pulse voltammetry on a CHI900 scanning electrochemical microscope. Dichloromethane and dichlorobenzene were distilled in the presence of  $\text{CaH}_2$ , hexane, THF, and toluene were distilled in the presence of Na and stored over 3 Å molecular sieves overnight.  $\text{HN}^t\text{Bu}_2$ ,  $\text{CHCl}_3$  and  $\text{CD}_2\text{Cl}_2$  were stored over 3 Å molecular sieves overnight. Unless otherwise noted, chemicals obtained from commercial suppliers were used without further purification.

## 2. Experimental Procedures

### Synthesis of 1a

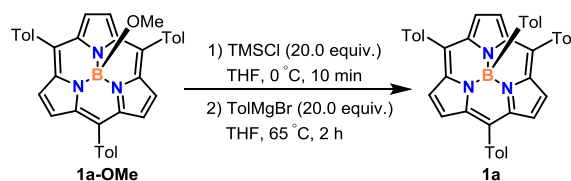

**Synthesis of  $p\text{-CH}_3\text{C}_6\text{H}_4\text{MgBr}$ :** Under an argon atmosphere,  $p\text{-CH}_3\text{C}_6\text{H}_4\text{Br}$  (2.5 mL, 20.317 mmol) was added to a solution of Mg (442.0 mg, 18.610 mmol) in dry tetrahydrofuran (15 mL) at 65 °C for 1 h. The majority of Mg dissolved and a gray suspension formed, which could be used as the THF solution of  $p\text{-CH}_3\text{C}_6\text{H}_4\text{MgBr}$ .

Under an argon atmosphere, trimethylchlorosilane (2.2 mL, 18 mmol) was added to a solution of **1a-OMe** (505.7 mg, 0.930 mmol) in dry tetrahydrofuran (15 mL) at 0 °C. After 10 min,  $p\text{-CH}_3\text{C}_6\text{H}_4\text{MgBr}$  in THF was added to the solution, and the resulting mixture was heated at 65 °C for 2 h. After cooling to room temperature, the reaction mixture was washed with water (50 mL  $\times$  3) and the organic phase was dried over  $\text{Na}_2\text{SO}_4$ . After removal of the solvents in vacuo, the residue was purified through a silica gel column ( $\text{CH}_2\text{Cl}_2$ :  $n\text{-hexane}$  = 1:5 as eluent). Recrystallization from  $\text{CH}_2\text{Cl}_2/\text{MeOH}$  gave **1a** as orange solids (366 mg, 0.562 mmol, 66% yield).  $^1\text{H}$  NMR (700 MHz,  $\text{CDCl}_3$ , 298 K)  $\delta$  = 8.13 (s, 6H,  $\beta\text{-H}$ ), 7.97 (d,  $J$  = 7.7 Hz, 6H,  $\text{meso-C}_6\text{H}_4\text{Me}$ ), 7.51 (d,  $J$  = 7.7 Hz, 6H,  $\text{meso-C}_6\text{H}_4\text{Me}$ ), 6.17 (d,  $J$  = 8.4 Hz, 2H,  $\text{axial-C}_6\text{H}_4\text{Me}$ ), 4.60 (d,  $J$  = 8.4 Hz, 2H,  $\text{axial-C}_6\text{H}_4\text{Me}$ ), 2.58 (s, 9H,  $\text{meso-C}_6\text{H}_4\text{Me}$ ), and 1.80 (s, 3H,  $\text{axial-C}_6\text{H}_4\text{Me}$ ) ppm.  $^{13}\text{C}$  NMR (176 MHz,  $\text{CDCl}_3$ )  $\delta$

= 140.5, 137.6, 135.1, 134.8, 133.3, 129.5, 128.9, 127.1, 122.1, 120.4, 21.5, and 20.9 ppm. (The signal of the carbon connecting to B atom was not observed.) UV-Vis (CH<sub>2</sub>Cl<sub>2</sub>): λ<sub>max</sub> (ε [M<sup>-1</sup> cm<sup>-1</sup>]) = 386 (130000), and 511 (17000) nm. HR-MS (MALDI-TOF-MS): *m/z* = 512.2301, calcd for (C<sub>36</sub>H<sub>27</sub>BN<sub>3</sub>)<sup>+</sup> = 512.2299 ([*M*-Tol]<sup>+</sup>).

### Synthesis of 2a-SbCl<sub>6</sub>

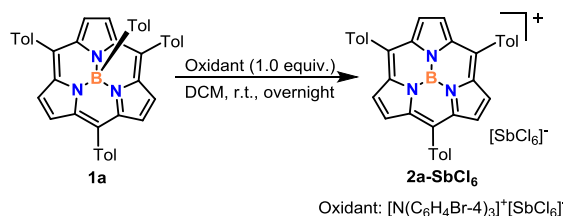

In a glovebox, to a CH<sub>2</sub>Cl<sub>2</sub> (5 mL) solution of **1a** (16.3 mg, 0.033 mmol) was added [N(C<sub>6</sub>H<sub>4</sub>Br-4)<sub>3</sub>]<sup>+</sup>[SbCl<sub>6</sub>]<sup>-</sup> (22.0 mg, 0.033 mmol) at room temperature. The resulting mixture was stirred overnight and filtered. The solvent was then removed under reduced pressure. Recrystallization from CH<sub>2</sub>Cl<sub>2</sub>/hexane gave **2a-SbCl<sub>6</sub>** as brown solids (20.0 mg, 0.0249 mmol, 89% yield). <sup>1</sup>H NMR (500 MHz, CDCl<sub>3</sub>, 298 K) δ = 8.89 (s, 6H, β-H), 8.14 (d, *J* = 7.3 Hz, 6H, C<sub>6</sub>H<sub>4</sub>Me), 7.66 (d, *J* = 7.3 Hz, 6H, C<sub>6</sub>H<sub>4</sub>Me), and 2.64 (s, 9H, C<sub>6</sub>H<sub>4</sub>Me) ppm. <sup>13</sup>C NMR (101 MHz, CD<sub>2</sub>Cl<sub>2</sub>) δ = 141.1, 137.1, 133.5, 132.0, 131.1, 129.6, 126.9, 21.6 ppm. UV-Vis (CH<sub>2</sub>Cl<sub>2</sub>): λ<sub>max</sub> (ε [M<sup>-1</sup> cm<sup>-1</sup>]) = 374 (140000), 463 (11000), and 489 (14000) nm. HR-MS (MALDI-TOF-MS): *m/z* = 512.2293, calcd for (C<sub>36</sub>H<sub>27</sub>BN<sub>3</sub>)<sup>+</sup> = 512.2299 ([*M*-SbCl<sub>6</sub>]<sup>+</sup>).

### Synthesis of 2a-BAr<sup>F</sup>

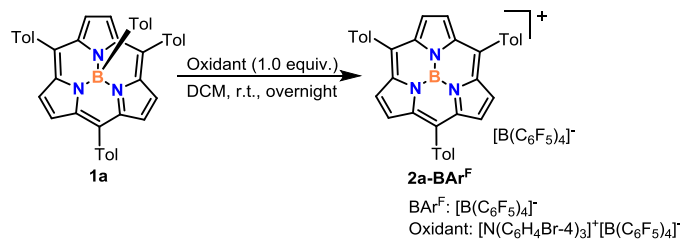

In a glovebox, to a CH<sub>2</sub>Cl<sub>2</sub> (5 mL) solution of **1a** (57.8 mg, 0.096 mmol) was added a solution of [N(C<sub>6</sub>H<sub>4</sub>Br-4)<sub>3</sub>]<sup>+</sup>[B(C<sub>6</sub>F<sub>5</sub>)<sub>4</sub>]<sup>-</sup> (111.0 mg, 0.096 mmol) in CH<sub>2</sub>Cl<sub>2</sub> (4 mL) at room temperature. The resulting mixture was stirred overnight and filtered. The solvent was then removed under reduced pressure. Recrystallization from CH<sub>2</sub>Cl<sub>2</sub>/hexane gave **2a-BAr<sup>F</sup>** as yellow solids (106 mg, 0.090 mmol, 88% yield). <sup>1</sup>H NMR (500 MHz, CDCl<sub>3</sub>, 298 K) δ = 9.03 (s, 6H, β-H), 8.10 (d, *J* = 7.8 Hz, 6H, C<sub>6</sub>H<sub>4</sub>Me), 7.70 (d, *J* = 7.8 Hz, 6H, C<sub>6</sub>H<sub>4</sub>Me), 2.65 (s, 9H, C<sub>6</sub>H<sub>4</sub>Me). <sup>13</sup>C NMR (126 MHz, CDCl<sub>3</sub>) δ = 141.6, 136.6, 133.2, 131.4, 131.3, 130.4, 129.4, 128.5, 127.8, 125.6, and 21.8 ppm. (Some signals of [B(C<sub>6</sub>F<sub>5</sub>)<sub>4</sub>]<sup>-</sup> are not observed due to complicated coupling of F atoms.) <sup>19</sup>F NMR (471 MHz, CDCl<sub>3</sub>) δ = -132.70 – -132.75 (m), -163.42 (t, *J* = 20.7 Hz), -167.00 – -167.09 (m) ppm. UV-Vis (CH<sub>2</sub>Cl<sub>2</sub>): λ<sub>max</sub> (ε [M<sup>-1</sup> cm<sup>-1</sup>]) = 376 (130000), 461 (10000), and 488 (17000) nm. HR-MS (MALDI-TOF-MS): *m/z* = 512.2293, calcd for (C<sub>36</sub>H<sub>27</sub>BN<sub>3</sub>)<sup>+</sup> = 512.2299 ([*M*-B(C<sub>6</sub>F<sub>5</sub>)<sub>4</sub>]<sup>+</sup>).

### Synthesis of 2a-SbF<sub>6</sub>

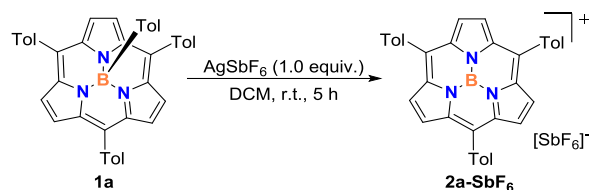

In a glovebox, to a  $\text{CH}_2\text{Cl}_2$  (6 mL) solution of **1a** (100 mg, 0.166 mmol) was added a  $\text{CH}_2\text{Cl}_2$  (2 mL) solution of  $\text{AgSbF}_6$  (56.9 mg, 0.166 mmol) at room temperature. The resulting mixture was stirred for 5 h and filtered. The solvent was then removed under reduced pressure. Recrystallization from  $\text{CH}_2\text{Cl}_2$ /hexane gave **2a-SbF<sub>6</sub>** as brown solids (88 mg, 0.118 mmol, 71% yield).

**Gram scale synthesis:** In a glovebox, to a  $\text{CH}_2\text{Cl}_2$  (30 mL) solution of **1a** (1.0142 g, 1.680 mmol) was added a solution of  $\text{AgSbF}_6$  (580 mg, 1.680 mmol) in  $\text{CH}_2\text{Cl}_2$  (20 mL) at room temperature. The resulting mixture was stirred overnight and filtered. Similar to the procedure above, **2a-SbF<sub>6</sub>** was afforded as brown solids (1.218 g, 1.628 mmol, 97% yield).  $^1\text{H}$  NMR (500 MHz,  $\text{CDCl}_3$ , 298 K)  $\delta$  = 8.99 (s, 6H,  $\beta$ -H), 8.15 (d,  $J$  = 8.0 Hz, 6H,  $\text{C}_6\text{H}_4\text{Me}$ ), 7.67 (d,  $J$  = 8.0 Hz, 6H,  $\text{C}_6\text{H}_4\text{Me}$ ), and 2.63 (s, 9H,  $\text{C}_6\text{H}_4\text{Me}$ ) ppm.  $^{13}\text{C}$  NMR (126 MHz,  $\text{CDCl}_3$ )  $\delta$  = 140.8, 136.7, 133.2, 131.6, 130.9, 129.9, 127.1, and 21.6 ppm. UV-Vis ( $\text{CH}_2\text{Cl}_2$ ):  $\lambda_{\text{max}}$  ( $\epsilon$  [ $\text{M}^{-1} \text{cm}^{-1}$ ]) = 373 (140000), 460 (12000), and 487 (15000) nm. HR-MS (MALDI-TOF-MS):  $m/z$  = 512.2293, calcd for  $(\text{C}_{36}\text{H}_{27}\text{BN}_3)^+$  = 512.2299 ( $[\text{M-SbF}_6]^+$ ).

### Synthesis of 3a

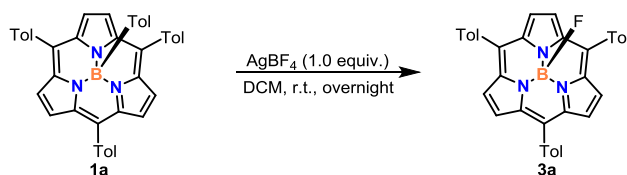

In a glovebox, to a solution of **1a** (25 mg, 0.041 mmol) in  $\text{CH}_2\text{Cl}_2$  (5 mL) was added  $\text{AgBF}_4$  (9.6 mg, 0.041 mmol) at room temperature. The resulting mixture was stirred overnight and filtered. The solvent was then removed under reduced pressure. Recrystallization from  $\text{CH}_2\text{Cl}_2$ /hexane gave **3a** as yellow solids (17.7 mg, 0.033 mmol, 81% yield).  $^1\text{H}$  NMR (500 MHz,  $\text{CDCl}_3$ , 298 K)  $\delta$  = 8.21 (s, 6H,  $\beta$ -H), 7.98 (d,  $J$  = 7.8 Hz, 6H,  $\text{C}_6\text{H}_4\text{Me}$ ), 7.54 (d,  $J$  = 7.8 Hz, 6H,  $\text{C}_6\text{H}_4\text{Me}$ ), and 2.60 (s, 9H,  $\text{C}_6\text{H}_4\text{Me}$ ) ppm.  $^{13}\text{C}$  NMR (126 MHz,  $\text{CDCl}_3$ )  $\delta$  = 140.6, 138.2, 134.4, 133.4, 129.9, 123.0, 121.0, and 21.7 ppm.  $^{19}\text{F}$  NMR (471 MHz,  $\text{CDCl}_3$ )  $\delta$  = -156.73– -156.98 (m) ppm. UV-Vis ( $\text{CH}_2\text{Cl}_2$ ):  $\lambda_{\text{max}}$  ( $\epsilon$  [ $\text{M}^{-1} \text{cm}^{-1}$ ]) = 376 (110000), 461 (11000), and 488 (12000) nm. HR-MS (MALDI-TOF-MS):  $m/z$  = 512.2293, calcd for  $(\text{C}_{36}\text{H}_{27}\text{BN}_3)^+$  = 512.2299 ( $[\text{M-F}]^+$ ).

### Synthesis of 1b

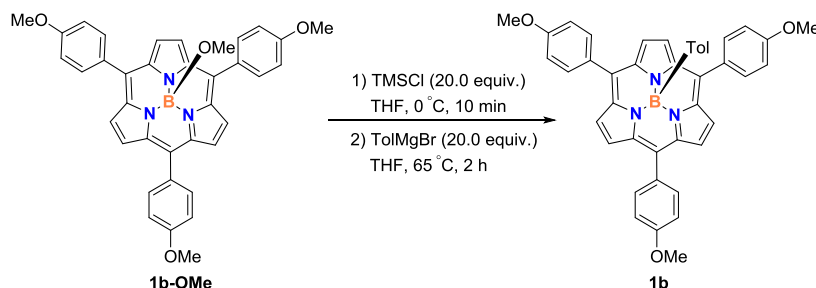

Under an argon atmosphere, trimethylchlorosilane (2.2 mL, 16.880 mmol) was added to a solution

of **1b-OMe** (500 mg, 0.844 mmol) in dry tetrahydrofuran (15 mL) at 0 °C. After 10 min, *p*-CH<sub>3</sub>C<sub>6</sub>H<sub>4</sub>MgBr prepared from *p*-CH<sub>3</sub>C<sub>6</sub>H<sub>4</sub>Br (2.3 mL, 18.691 mmol) and Mg (412 mg, 16.948 mmol) in tetrahydrofuran (15 mL) was added to the solution, and the resulting mixture was heated at 65 °C for 2 h. After cooling to room temperature, the reaction mixture was washed with water (50 mL × 3) and the organic phase was dried over Na<sub>2</sub>SO<sub>4</sub>. After removal of the solvent in vacuo, the residue was purified through a silica gel column (CH<sub>2</sub>Cl<sub>2</sub>: *n*-hexane = 1:5 as eluent). Recrystallization from CH<sub>2</sub>Cl<sub>2</sub>/MeOH gave **1b** as orange solids (366 mg, 0.562 mmol, 66% yield). <sup>1</sup>H NMR (500 MHz, CDCl<sub>3</sub>, 298 K) δ = 8.11 (s, 6H, β-H), 8.00 (d, *J* = 8.8 Hz, 6H, *meso*-C<sub>6</sub>H<sub>4</sub>OMe), 7.24 (d, *J* = 8.8 Hz, 6H, *meso*-C<sub>6</sub>H<sub>4</sub>OMe), 6.16 (d, *J* = 7.8 Hz, 2H, *axial*-C<sub>6</sub>H<sub>4</sub>Me), 4.59 (d, *J* = 7.8 Hz, 2H, *axial*-C<sub>6</sub>H<sub>4</sub>Me), 4.00 (s, 9H, C<sub>6</sub>H<sub>4</sub>OMe), and 1.79 (s, 3H, C<sub>6</sub>H<sub>4</sub>Me) ppm. <sup>13</sup>C NMR (126 MHz, CDCl<sub>3</sub>) δ = 159.6, 140.3, 135.1, 134.3, 130.1, 128.9, 127.1, 122.0, 120.0, 114.3, 55.7, and 20.9 ppm. (The signal of the carbon connecting to B atom was not observed.) UV-Vis (CH<sub>2</sub>Cl<sub>2</sub>): λ<sub>max</sub> (ε [M<sup>-1</sup> cm<sup>-1</sup>]) = 388 (130000), and 518 (22000) nm. HR-MS (MALDI-TOF-MS): *m/z* = 560.2138, calcd for (C<sub>36</sub>H<sub>27</sub>BN<sub>3</sub>O<sub>3</sub>)<sup>+</sup> = 560.2146 ([*M*-Tol]<sup>+</sup>).

### Synthesis of **4b**

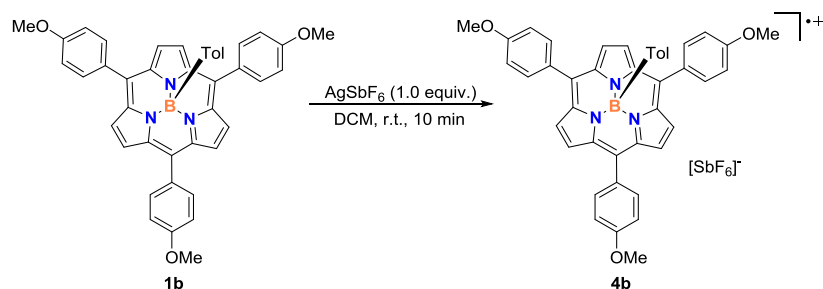

In a glovebox, a solution of **1b** (50.5 mg, 0.078 mmol) in CH<sub>2</sub>Cl<sub>2</sub> (2 mL) was added a solution of AgSbF<sub>6</sub> (26.6mg, 0.078 mmol) in CH<sub>2</sub>Cl<sub>2</sub> (2 mL) at room temperature. The resulting mixture was stirred for 10 min and filtered. The solvent was then removed under reduced pressure. Recrystallization from CH<sub>2</sub>Cl<sub>2</sub>/hexane gave **4b** as black solids (67.8 mg, 0.075 mmol, 96% yield). UV-Vis-NIR (CH<sub>2</sub>Cl<sub>2</sub>): λ<sub>max</sub> (ε [M<sup>-1</sup> cm<sup>-1</sup>]) = 389 (110000), 479 (25000), 510 (17000), 619 (39000), and 937 (24000) nm. HR-MS (MALDI-TOF-MS): *m/z* = 560.2125, calcd for (C<sub>36</sub>H<sub>27</sub>BN<sub>3</sub>O<sub>3</sub>)<sup>+</sup> = 560.2146 ([*M*-Tol-SbF<sub>6</sub>]<sup>+</sup>).

### Synthesis of **2b-SbF<sub>6</sub>**

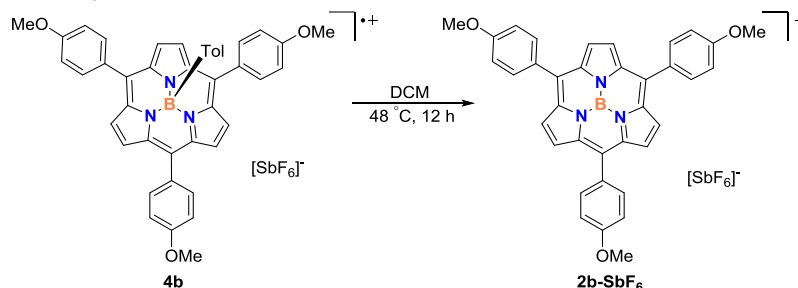

In a glovebox, a solution of **4b** (28.6 mg, 0.032 mmol) in CH<sub>2</sub>Cl<sub>2</sub> (8 mL) was added to a Schlenk tube. The Schlenk tube was sealed and moved outside the glovebox. After heating for 12 h at reflux and cooling to room temperature, the Schlenk tube was moved inside the glovebox. The solution was concentrated to ca. 1 mL and hexane (5 mL) was added to the solution for recrystallization. **2b-SbF<sub>6</sub>** was obtained as red solids (26.8 mg, 0.034 mmol, 85% yield). <sup>1</sup>H NMR (500 MHz, CD<sub>2</sub>Cl<sub>2</sub>,

298 K)  $\delta = 9.05$  (s, 6H,  $\beta$ -H), 8.26 (d,  $J = 7.5$  Hz, 6H,  $C_6H_4OMe$ ), 7.45 (d,  $J = 7.5$  Hz, 6H,  $C_6H_4OMe$ ), and 4.06 (s, 9H,  $C_6H_4OMe$ ) ppm.  $^{13}C$  NMR (126 MHz,  $CDCl_3$ )  $\delta = 162.4, 136.6, 135.0, 130.4, 127.3, 127.1, 116.4,$  and 56.4 ppm. UV-Vis ( $CH_2Cl_2$ ):  $\lambda_{max}$  ( $\epsilon [M^{-1} cm^{-1}]$ ) = 380 (110000), and 503 (20000) nm, HR-MS (MALDI-TOF-MS):  $m/z = 560.2148$ , calcd for  $(C_{36}H_{27}BN_3O_3)^+ = 560.2146$  ( $[M-SbF_6]^+$ ).

### Synthesis of 1c-Br

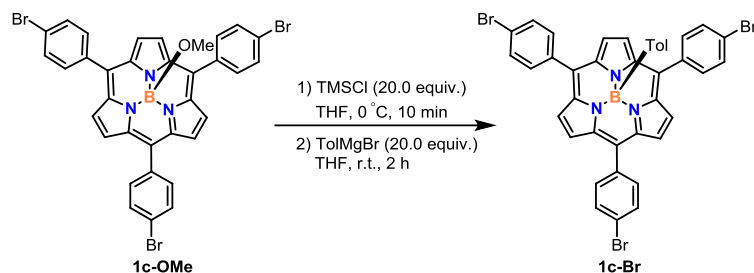

Under an argon atmosphere, trimethylchlorosilane (1.61 mL, 13.55 mmol) was added to a solution of **1c-OMe** (500 mg, 0.678 mmol) in dry THF (15 mL) at 0 °C. After 10 min, a THF (15 mL) solution of  $p-CH_3C_6H_4MgBr$  prepared from  $p-CH_3C_6H_4Br$  (1.65 mL, 13.55 mmol) and Mg (325.2 mg, 13.55 mmol) was added to the reaction and the resulting mixture was stirred at room temperature for 2 h. The reaction mixture was washed with water (50 mL  $\times$  3) and the organic phase was dried over  $Na_2SO_4$ . After removal of the solvent in vacuo, the residue was purified through a silica gel column ( $CH_2Cl_2$ :  $n$ -hexane = 1:5 as eluent). Recrystallization from  $CH_2Cl_2/MeOH$  gave **1c-Br** as orange solids (458.5 mg, 0.577 mmol, 85.1% yield).  $^1H$  NMR (700 MHz,  $CDCl_3$ )  $\delta = 8.12$  (s, 6H,  $\beta$ -H), 7.92 (d,  $J = 8.4$  Hz, 6H,  $C_6H_4Br$ ), 7.84 (d,  $J = 8.4$  Hz, 6H,  $C_6H_4Br$ ), 6.17 (d,  $J = 7.7$  Hz, 2H,  $C_6H_4Me$ ), 4.55 (d,  $J = 7.7$  Hz, 2H,  $C_6H_4Me$ ), 1.80 (s, 3H,  $C_6H_4Me$ ) ppm.  $^{13}C$  NMR (176 MHz,  $CDCl_3$ )  $\delta = 140.5, 136.3, 135.5, 134.6, 132.0, 128.7, 127.2, 122.8, 122.3, 119.5, 20.9$  ppm. (The signal of the carbon connecting to B atom was not observed.) HR-MS (MALDI-TOF-MS):  $m/z = 705.9123$ , calcd for  $(C_{33}H_{18}BBR_3N_3)^+ = 705.9125$  ( $[M-Tol]^+$ ).

### Synthesis of 1c

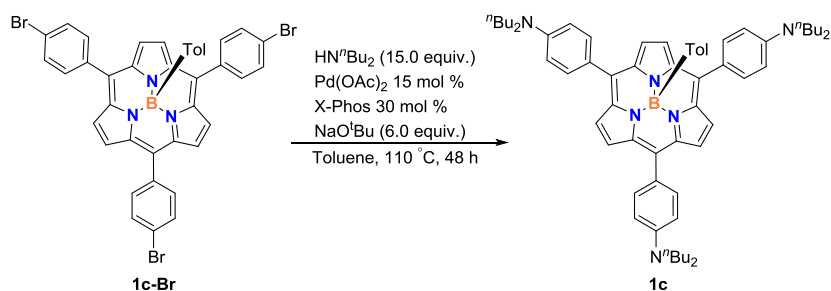

Dibutylamine (0.33 mL, 1.9 mmol) was added to a toluene (6 mL) solution of **1c-Br** (101.3 mg, 0.130 mmol),  $Pd(OAc)_2$  (4.4 mg, 0.019 mmol), X-Phos (18.5 mg, 0.038 mmol), and  $NaO^tBu$  (74.5 mg, 0.76 mmol) in a Schlenk tube. This mixture was deoxygenated via three freeze-pump-thaw cycles and heated at 110 °C for 48 h. After cooling to room temperature, the reaction mixture was washed by water (50 mL  $\times$  3) and the organic phase was dried over  $Na_2SO_4$ . After removal of the volatile in vacuo, the residue was purified by silica gel column ( $CH_2Cl_2$ :  $n$ -hexane = 1:4 as eluent). Further recrystallization from  $CH_2Cl_2/MeOH$  gave purple solids (52.7 mg, 0.056 mmol, 44% yield).  $^1H$  NMR (500 MHz,  $CDCl_3$ , 298 K)  $\delta = 8.13$  (s, 6H,  $\beta$ -H), 7.95 (d,  $J = 8.8$  Hz, 6H,  $C_6H_4N^tBu_2$ ),

6.94 (d,  $J = 8.8$  Hz, 6H,  $C_6H_4N^tBu_2$ ), 6.11 (d,  $J = 7.8$  Hz, 2H,  $C_6H_4Me$ ), 4.59 (d,  $J = 7.8$  Hz, 2H,  $C_6H_4Me$ ), 3.42 (t,  $J = 7.8$  Hz, 12H,  $C_6H_4N(CH_2CH_2CH_2CH_3)_2$ ), 1.76 (s, 3H,  $C_6H_4Me$ ), 1.74-1.68 (m, 12H,  $C_6H_4N^tBu_2$ ), 1.48-1.41 (m, 12H,  $C_6H_4N^tBu_2$ ), and 1.02 (t,  $J = 7.5$  Hz, 18H,  $C_6H_4N(CH_2CH_2CH_2CH_3)_2$ ) ppm. (Trace  $NH_2NH_2 \cdot H_2O$  was added in the sample to avoid oxidation by air.)  $^{13}C$  NMR (176 MHz,  $CDCl_3$ )  $\delta = 147.7, 139.5, 134.5, 134.2, 129.0, 126.8, 124.8, 121.7, 120.3, 111.9, 51.1, 29.8, 20.8, 20.5,$  and 14.2 ppm. (The signal of the carbon connecting to B atom was not observed. Trace  $NH_2NH_2 \cdot H_2O$  was added in the sample to avoid oxidation by air.) UV-Vis ( $CH_2Cl_2$ ):  $\lambda_{max}$  ( $\epsilon [M^{-1} cm^{-1}]$ ) = 416 (56000) and 563 (41000) nm. HR-MS (MALDI-TOF-MS):  $m/z = 851.5908$ , calcd for  $(C_{57}H_{72}BN_6)^+ = 851.5915$  ( $[M-Tol]^+$ ).

### Synthesis of 4c

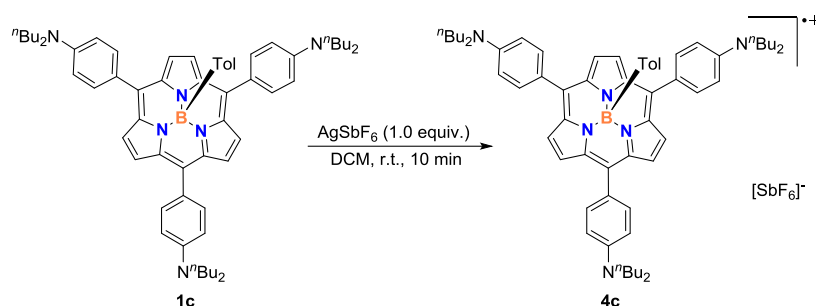

In a glovebox, to a  $CH_2Cl_2$  (6 mL) solution of **1c** (47.1 mg, 0.050 mmol) was added a  $CH_2Cl_2$  (2 mL) solution of  $AgSbF_6$  (17.2 mg, 0.050 mmol) at room temperature. The resulting mixture was stirred for 10 min and filtered. The solvent was then removed under reduced pressure. Recrystallization from  $CH_2Cl_2$ /hexane gave **4c** as black solids (39.3 mg, 0.033 mmol, 66% yield). UV-Vis-NIR ( $CH_2Cl_2$ ):  $\lambda_{max}$  ( $\epsilon [M^{-1} cm^{-1}]$ ) = 360 (26000), 412 (74000), 484 (60000), 758 (96000), and 1394 (71000) nm. HR-MS (MALDI-TOF-MS):  $m/z = 942.6443$ , calcd for  $(C_{64}H_{79}BN_6)^+ = 942.6464$  ( $[M-SbF_6]^+$ ).

### Synthesis of dication 7c

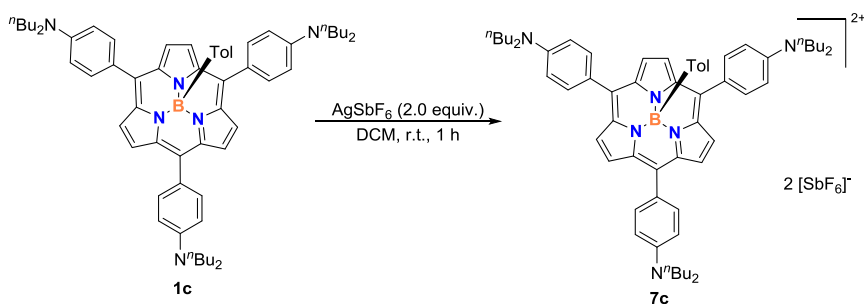

In a glovebox, a  $CH_2Cl_2$  (2 mL) solution of  $AgSbF_6$  (34.6 mg, 0.100 mmol) was added to a  $CH_2Cl_2$  (6 mL) solution of **1c** (47.1 mg, 0.050 mmol) at room temperature. The resulting mixture was stirred for 1 h and filtered. The solvent was then removed under reduced pressure. Recrystallization from  $CH_2Cl_2$ /hexane gave **7c** as black solids (67.6 mg, 0.046 mmol, 93% yield).  $^1H$  NMR (500 MHz,  $CD_2Cl_2$  298 K)  $\delta = 8.46$  (d,  $J = 9.5$  Hz, 6H,  $C_6H_4^tNBu_2$ ), 7.44 (s, 6H,  $\beta$ -H), 7.15 (d,  $J = 9.5$  Hz, 6H,  $C_6H_4^tNBu_2$ ), 6.84 (d,  $J = 7.5$  Hz, 2H,  $C_6H_4Me$ ), 6.69 (d,  $J = 7.5$  Hz, 2H,  $C_6H_4Me$ ), 3.73 (t,  $J = 7.8$  Hz, 12H,  $C_6H_4N(CH_2CH_2CH_2CH_3)_2$ ), 2.12 (s, 3H,  $C_6H_4Me$ ), 1.83-1.77 (m, 12H,  $C_6H_4N^tBu_2$ ), 1.53-1.47 (m, 12H,  $C_6H_4N^tBu_2$ ), and 1.04 (t,  $J = 7.3$  Hz, 18H,  $C_6H_4N(CH_2CH_2CH_2CH_3)_2$ ).  $^{13}C$  NMR



(101 MHz, CD<sub>2</sub>Cl<sub>2</sub>)  $\delta$  = 156.9, 142.6, 138.7, 138.6, 138.1, 130.3, 130.0, 129.0, 128.1, 125.3, 117.2, 30.9, 21.2, 20.7, and 13.9 ppm. (The signal of N(CH<sub>2</sub>CH<sub>2</sub>CH<sub>2</sub>CH<sub>3</sub>)<sub>2</sub> overlaps with signals of CD<sub>2</sub>Cl<sub>2</sub>, which has been further confirmed by phase sensitive HSQC.) UV-Vis-NIR (CH<sub>2</sub>Cl<sub>2</sub>):  $\lambda_{\text{max}}$  ( $\epsilon$  [M<sup>-1</sup> cm<sup>-1</sup>]) = 416 (40000), 484 (30000), 562 (40000), and 972 (81000) nm. HR-MS (MALDI-TOF-MS):  $m/z$  = 1177.5392, calcd for (C<sub>64</sub>H<sub>79</sub>BF<sub>6</sub>N<sub>6</sub>Sb)<sup>+</sup> = 1177.5407 ([M-SbF<sub>6</sub>]<sup>+</sup>).

### Synthesis of **1d-OH**

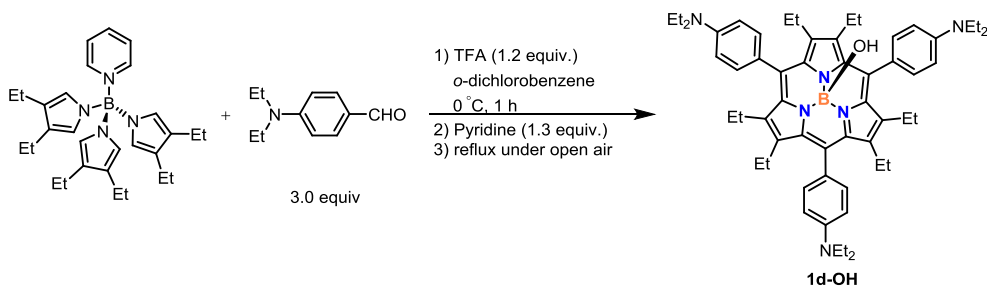

A mixture of borane pyridine complex (1.52 mL, 0.015 mmol) and 3,4-diethyl-1H-pyrrole (5.1 g, 0.042 mol) was heated at 100 °C for 3 h under an argon atmosphere. After the mixture cooling to room temperature volatile was removed in vacuo to give the crude pyridine-tri-*N*-(3,4-diethylpyrrolyl)borane. This solid was dissolved in 1,2-dichlorobenzene (375 mL) and 4-Diethylaminobenzaldehyde (7.53 g, 0.042 mol) was then added. The solution was cooled to 0 °C and trifluoroacetic acid (1.25 mL, 0.017 mol) was added thereafter. The solution was stirred at 0 °C for 1 h then pyridine (1.48 mL, 0.018 mol) was added and the reaction mixture was refluxed under open air for 5 h. After removal of the volatile in vacuo, the residue was purified by Al<sub>2</sub>O<sub>3</sub> column (CH<sub>2</sub>Cl<sub>2</sub>: *n*-hexane = 1:1 as eluent) and gel permeation chromatography (CHCl<sub>3</sub> as eluent). Further recrystallization from CH<sub>2</sub>Cl<sub>2</sub>/hexane gave **1d-OH** as green solids (556.6 mg, 0.640 mmol, 5% yield). <sup>1</sup>H NMR (700 MHz, CDCl<sub>3</sub>, 298 K)  $\delta$  = 8.02 (br, 3H, C<sub>6</sub>H<sub>4</sub>NEt<sub>2</sub>), 7.22 (br, 3H, C<sub>6</sub>H<sub>4</sub>NEt<sub>2</sub>), 6.96 (br, 3H, C<sub>6</sub>H<sub>4</sub>NEt<sub>2</sub>), 6.78 (br, 3H, C<sub>6</sub>H<sub>4</sub>NEt<sub>2</sub>), 3.52 (q,  $J$  = 7.0 Hz, 12H, C<sub>6</sub>H<sub>4</sub>N(CH<sub>2</sub>CH<sub>3</sub>)<sub>2</sub>), 2.72 (q,  $J$  = 7.7 Hz, 12H,  $\beta$ -N(CH<sub>2</sub>CH<sub>3</sub>)<sub>2</sub>), 1.29 (t,  $J$  = 7.0 Hz, 18H, C<sub>6</sub>H<sub>4</sub>N(CH<sub>2</sub>CH<sub>3</sub>)<sub>2</sub>), 1.08 (t,  $J$  = 7.7 Hz, 18H,  $\beta$ -N(CH<sub>2</sub>CH<sub>3</sub>)<sub>2</sub>), and -3.22 (br, 1H, *axial*-OH) ppm. <sup>13</sup>C NMR (176 MHz, CDCl<sub>3</sub>)  $\delta$  = 147.9, 137.9, 136.4, 133.5(br), 132.7(br), 125.0, 117.5, 111.5(br), 111.2(br), 44.8, 19.2, 17.2, and 12.6 ppm. UV-Vis (CH<sub>2</sub>Cl<sub>2</sub>):  $\lambda_{\text{max}}$  ( $\epsilon$  [M<sup>-1</sup> cm<sup>-1</sup>]) = 358 (89000), and 450 (18000) nm. HR-MS (MALDI-TOF-MS):  $m/z$  = 851.5872, calcd for (C<sub>57</sub>H<sub>72</sub>BN<sub>6</sub>)<sup>+</sup> = 851.5915 ([M-OH]<sup>+</sup>).

### Synthesis of **1d**

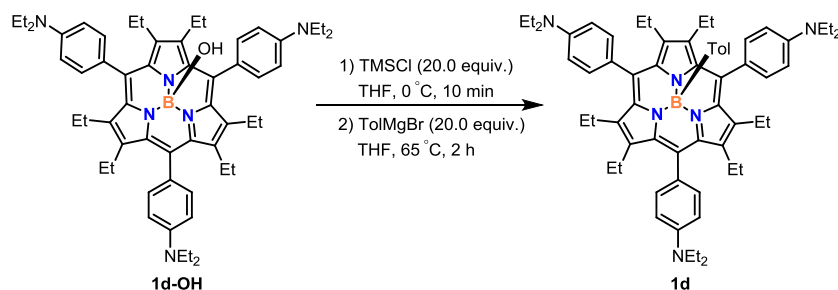

Under an argon atmosphere, trimethylchlorosilane (0.42 mL, 3.26 mmol) was added to a solution of **1d-OH** (141.7 mg, 0.163 mmol) in dry THF (5 mL) at 0 °C. After 10 min, a THF (4 mL) solution of *p*-CH<sub>3</sub>C<sub>6</sub>H<sub>4</sub>MgBr prepared from *p*-CH<sub>3</sub>C<sub>6</sub>H<sub>4</sub>Br (0.60 mL, 4.876 mmol) and Mg (84.7 mg, 3.484

mmol) was added to the reaction and the resulting mixture was heated at 65 °C for 2 h. After cooling to room temperature, the reaction mixture was washed with water (50 mL × 3) and the organic phase was dried over Na<sub>2</sub>SO<sub>4</sub>. After removal of the solvent in vacuo, the residue was purified through a silica gel column (CH<sub>2</sub>Cl<sub>2</sub>: *n*-hexane = 1:5 as eluent). Recrystallization from CH<sub>2</sub>Cl<sub>2</sub>/MeOH gave **1d** as yellow solids (38.2 mg, 0.041 mmol, 25% yield). <sup>1</sup>H NMR (700 MHz, CDCl<sub>3</sub>, 298 K) δ = 7.88 (br, 3H, C<sub>6</sub>H<sub>4</sub>NEt<sub>2</sub>), 7.36 (br, 3H, C<sub>6</sub>H<sub>4</sub>NEt<sub>2</sub>), 6.86 (br, 6H, C<sub>6</sub>H<sub>4</sub>NEt<sub>2</sub>), 6.13 (d, *J* = 8.1 Hz, 2H, C<sub>6</sub>H<sub>4</sub>Me), 4.36 (d, *J* = 8.1 Hz, 2H, C<sub>6</sub>H<sub>4</sub>Me), 3.51 (q, *J* = 7.0 Hz, 12H, C<sub>6</sub>H<sub>4</sub>N(CH<sub>2</sub>CH<sub>3</sub>)<sub>2</sub>), 2.77–2.70 (m, 12H, β-N(CH<sub>2</sub>CH<sub>3</sub>)<sub>2</sub>), 1.81 (s, 3H, C<sub>6</sub>H<sub>4</sub>Me), 1.28 (t, *J* = 7.0 Hz, 18H, C<sub>6</sub>H<sub>4</sub>N(CH<sub>2</sub>CH<sub>3</sub>)<sub>2</sub>), and 1.04 (t, *J* = 7.4 Hz, 18H, β-N(CH<sub>2</sub>CH<sub>3</sub>)<sub>2</sub>) ppm. <sup>13</sup>C NMR (176 MHz, CDCl<sub>3</sub>) δ = 147.8, 137.7, 136.5, 133.7, 129.1, 126.6, 125.5, 117.5, 111.3, 44.9, 20.9, 19.3, 17.2, and 12.6 ppm. (The signals of the two carbons were observed as broad peaks, whose chemical shifts were difficult to note.) UV-Vis (CH<sub>2</sub>Cl<sub>2</sub>): λ<sub>max</sub> (ε [M<sup>-1</sup> cm<sup>-1</sup>]) = 314 (50000), 382 (102000) and 466 (16000) nm. HR-MS (MALDI-TOF-MS): *m/z* = 851.5927, calcd for (C<sub>57</sub>H<sub>72</sub>BN<sub>6</sub>)<sup>+</sup> = 851.5915 ([*M*-Tol]<sup>+</sup>).

### Synthesis of 2d-SbF<sub>6</sub>

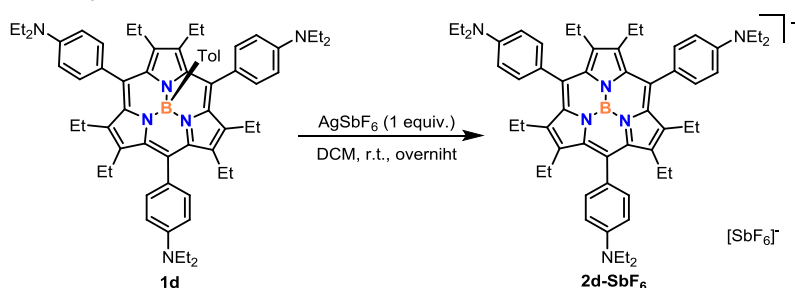

In a glovebox, a CH<sub>2</sub>Cl<sub>2</sub> (2 mL) solution of AgSbF<sub>6</sub> (7.60 mg, 0.022 mmol) was added to a CH<sub>2</sub>Cl<sub>2</sub> (2 mL) solution of **1d** (20.8 mg, 0.022 mmol) at room temperature. The resulting mixture was stirred overnight and filtered. The solvent was then removed under reduced pressure. Recrystallization from CH<sub>2</sub>Cl<sub>2</sub>/hexane gave **2d-SbF<sub>6</sub>** as orange solids (16.4 mg, 0.015 mmol, 68% yield). <sup>1</sup>H NMR (500 MHz, CD<sub>2</sub>Cl<sub>2</sub>, 298 K) δ = 7.66 (d, *J* = 8.3 Hz, 6H, C<sub>6</sub>H<sub>4</sub>NEt<sub>2</sub>), 6.99 (d, *J* = 8.3 Hz, 6H, C<sub>6</sub>H<sub>4</sub>NEt<sub>2</sub>), 3.58 (q, *J* = 6.5 Hz, 12H, C<sub>6</sub>H<sub>4</sub>N(CH<sub>2</sub>CH<sub>3</sub>)<sub>2</sub>), 3.08 (q, *J* = 7.0 Hz, 12H, β-N(CH<sub>2</sub>CH<sub>3</sub>)<sub>2</sub>), 1.32 (t, *J* = 6.5 Hz, 18H, C<sub>6</sub>H<sub>4</sub>N(CH<sub>2</sub>CH<sub>3</sub>)<sub>2</sub>), and 1.17 (t, *J* = 7.0 Hz, 18H, β-N(CH<sub>2</sub>CH<sub>3</sub>)<sub>2</sub>). <sup>13</sup>C NMR (101 MHz, CD<sub>2</sub>Cl<sub>2</sub>) δ = 149.4, 145.9, 134.3, 132.8, 125.1, 119.9, 111.4, 45.0, 20.0, 16.7, and 12.6 ppm. UV-Vis (CH<sub>2</sub>Cl<sub>2</sub>): λ<sub>max</sub> (ε [M<sup>-1</sup> cm<sup>-1</sup>]) = 344 (126000), 420 (28000), and 512 (15000) nm. HR-MS (MALDI-TOF-MS): *m/z* = 851.5906, calcd for (C<sub>57</sub>H<sub>72</sub>BN<sub>6</sub>)<sup>+</sup> = 851.5915 ([*M*-SbF<sub>6</sub>]<sup>+</sup>).

### 3. Copy of $^1\text{H}$ NMR and $^{13}\text{C}$ NMR spectra

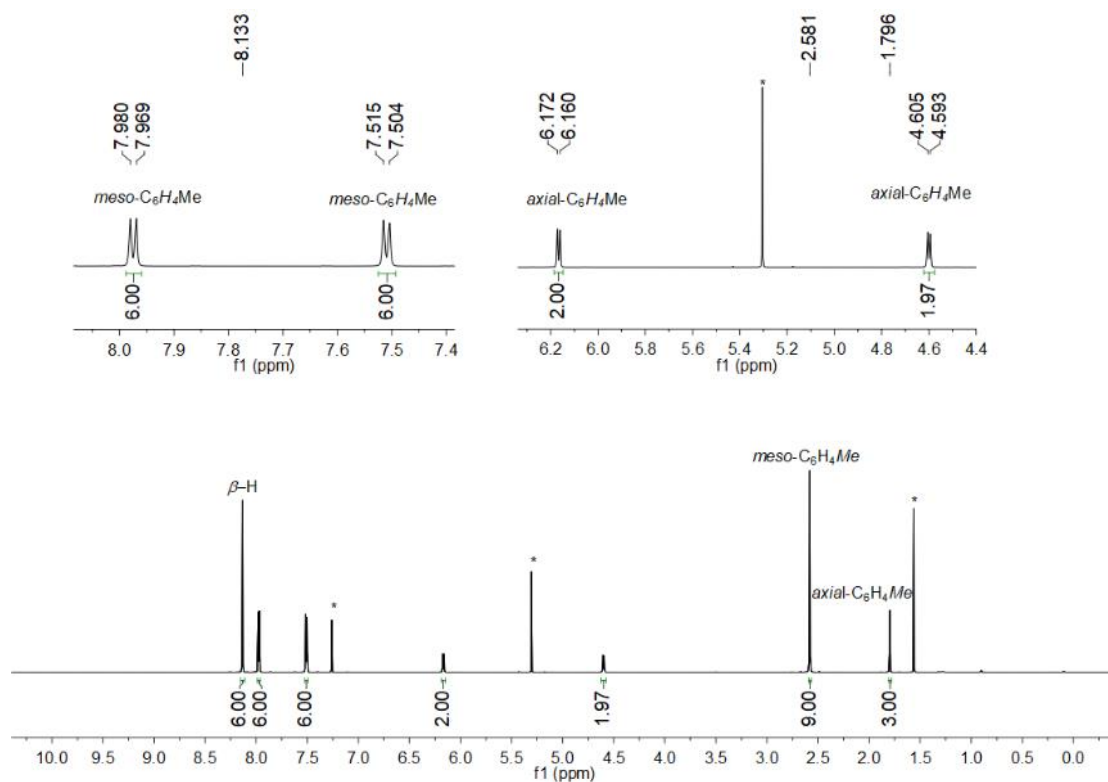

Fig. S1  $^1\text{H}$  NMR spectrum of **1a** in  $\text{CDCl}_3$ . \*Solvents or impurities

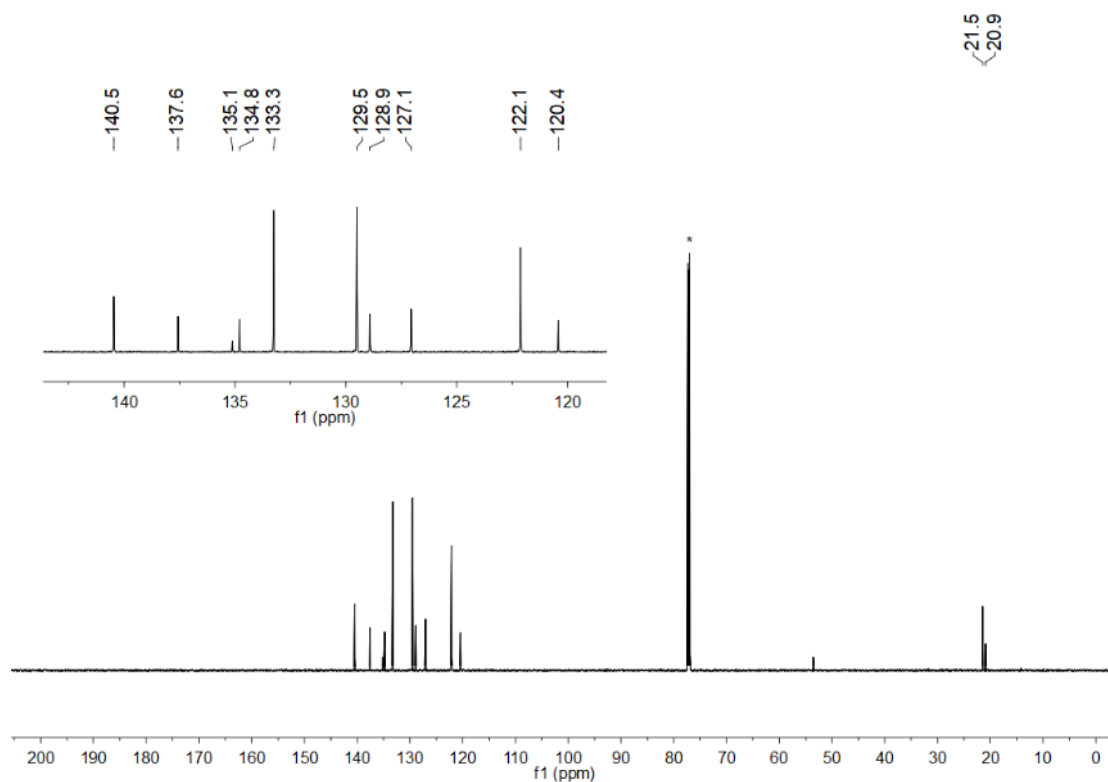

Fig. S2  $^{13}\text{C}$  NMR spectrum of **1a** in  $\text{CDCl}_3$ . \*Solvents or impurities

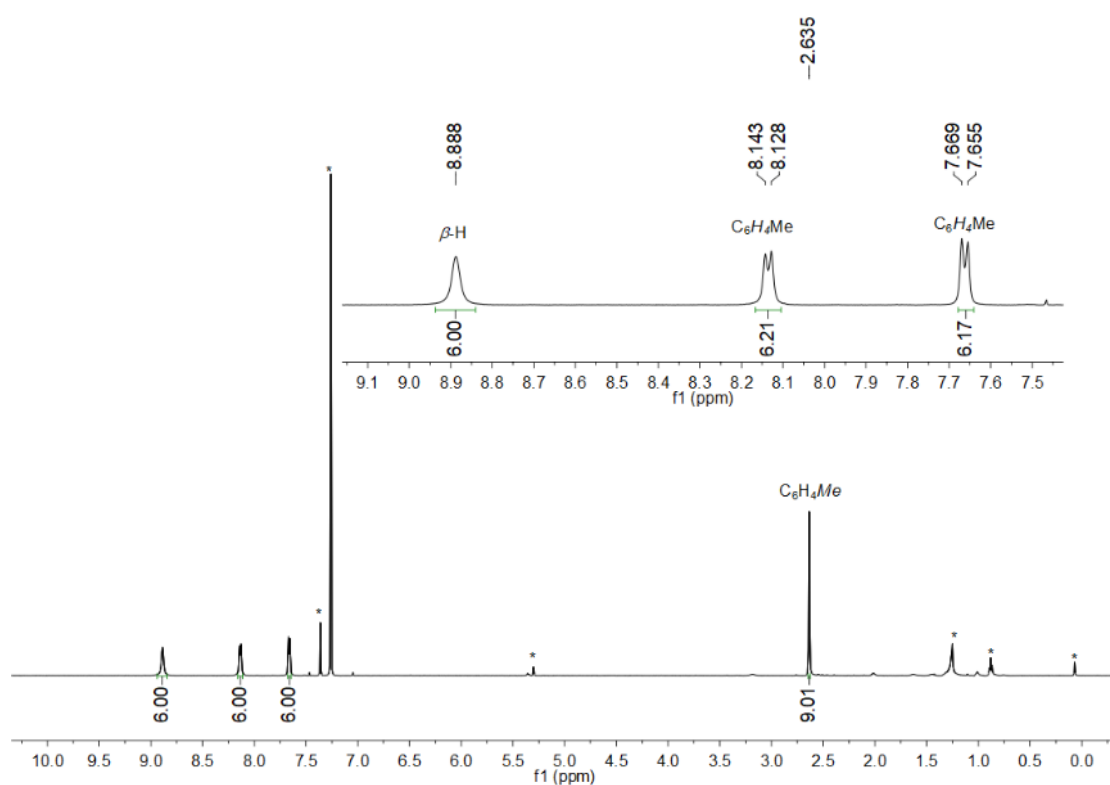

Fig. S3  $^1\text{H}$  NMR spectrum of  $2\text{a-SbCl}_6$  in  $\text{CDCl}_3$ . \*Solvents or impurities

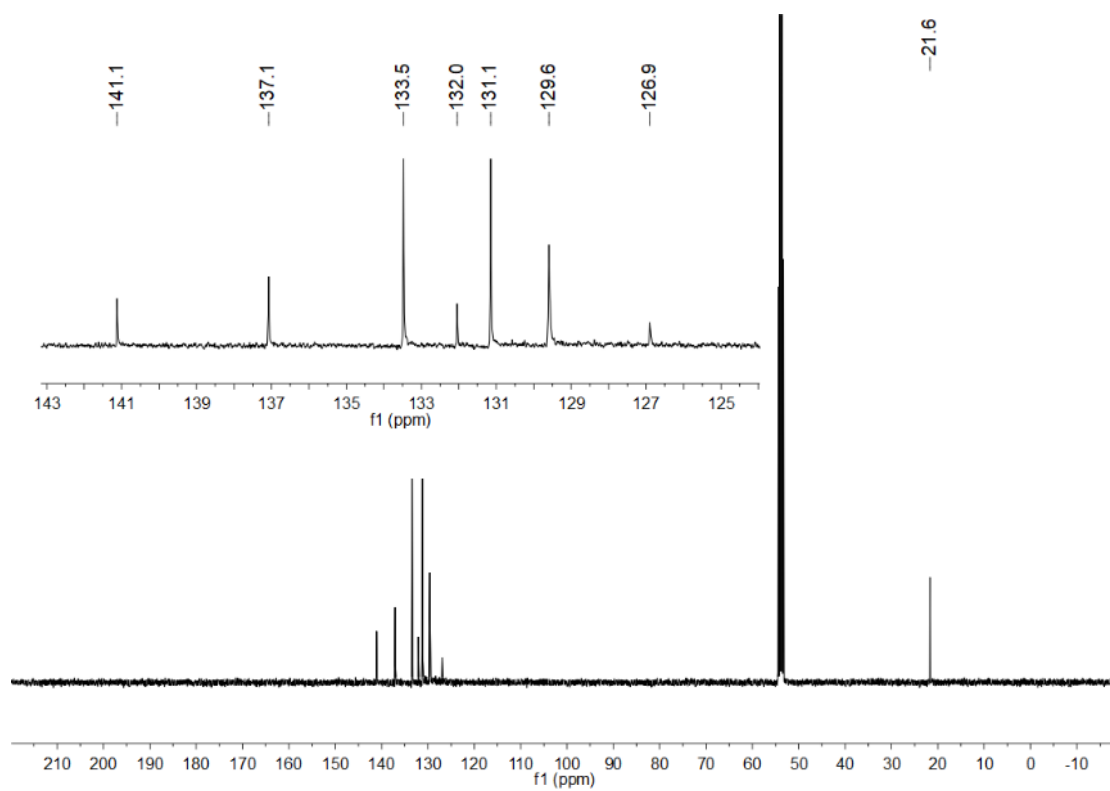

Fig. S4  $^{13}\text{C}$  NMR spectrum of  $2\text{a-SbCl}_6$  in  $\text{CD}_2\text{Cl}_2$ . \*Solvents or impurities

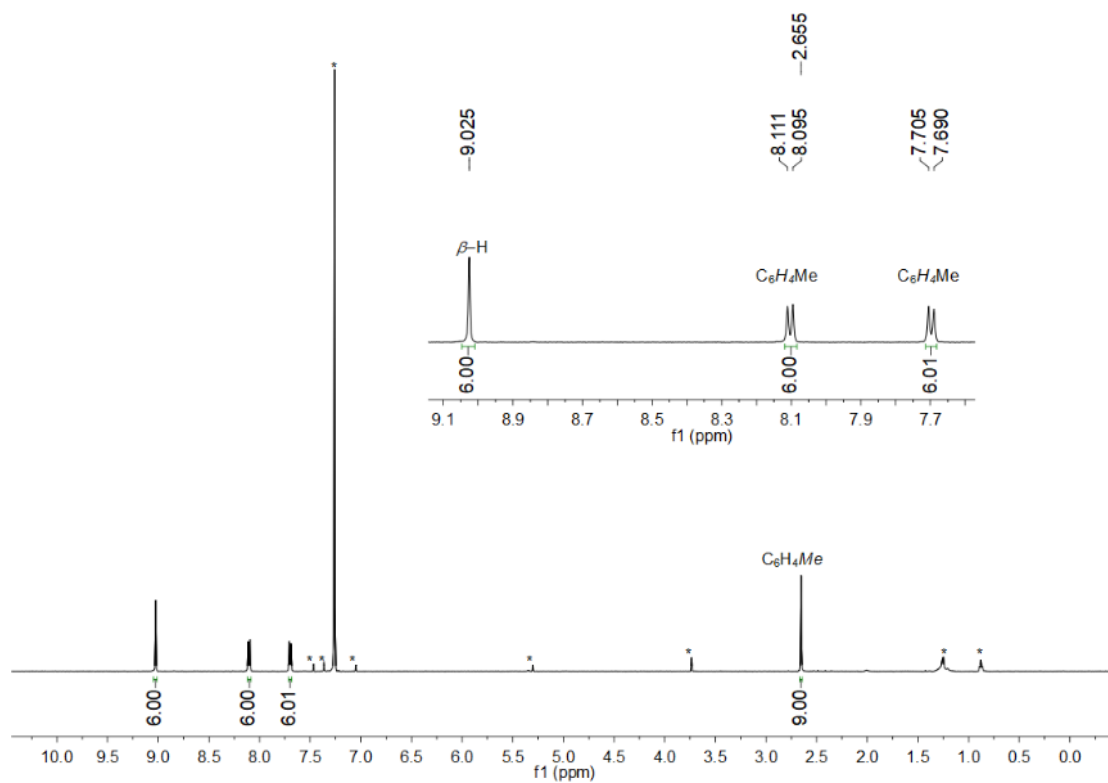

Fig. S5  $^1\text{H}$  NMR spectrum of **2a-BAr<sup>F</sup>** in  $\text{CDCl}_3$ . \*Solvents or impurities

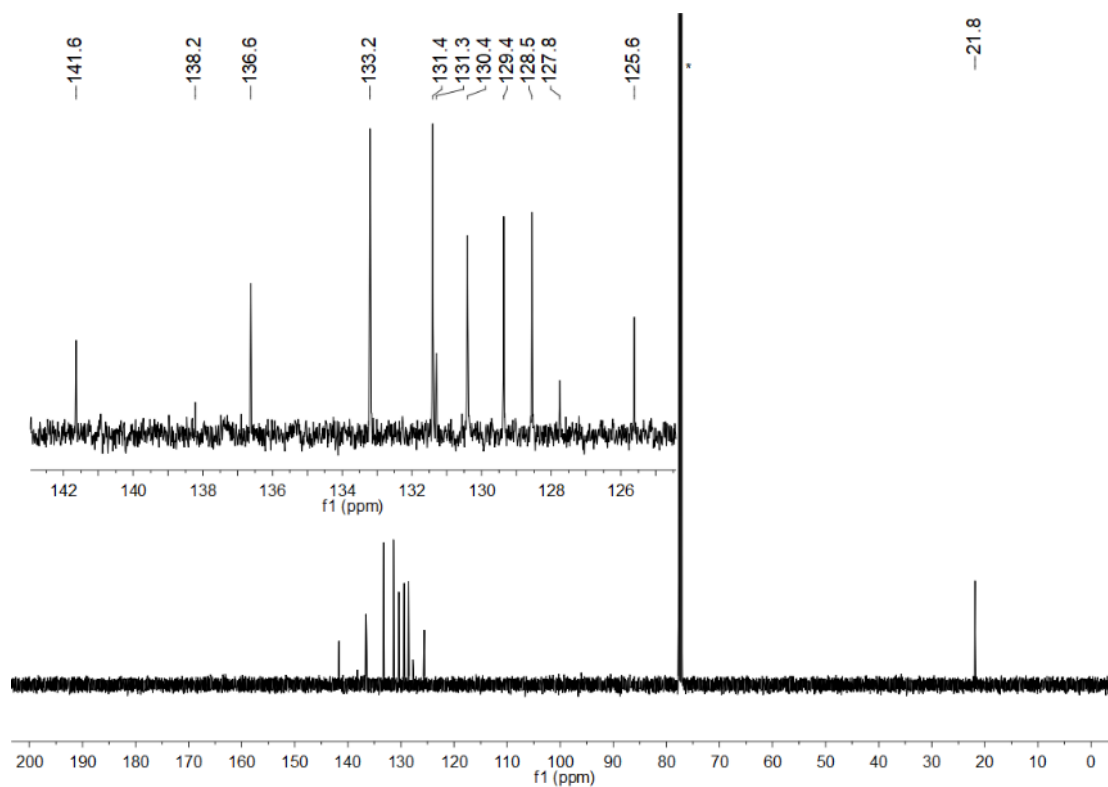

Fig. S6  $^{13}\text{C}$  NMR spectrum of **2a-BAr<sup>F</sup>** in  $\text{CDCl}_3$ . \*Solvents or impurities

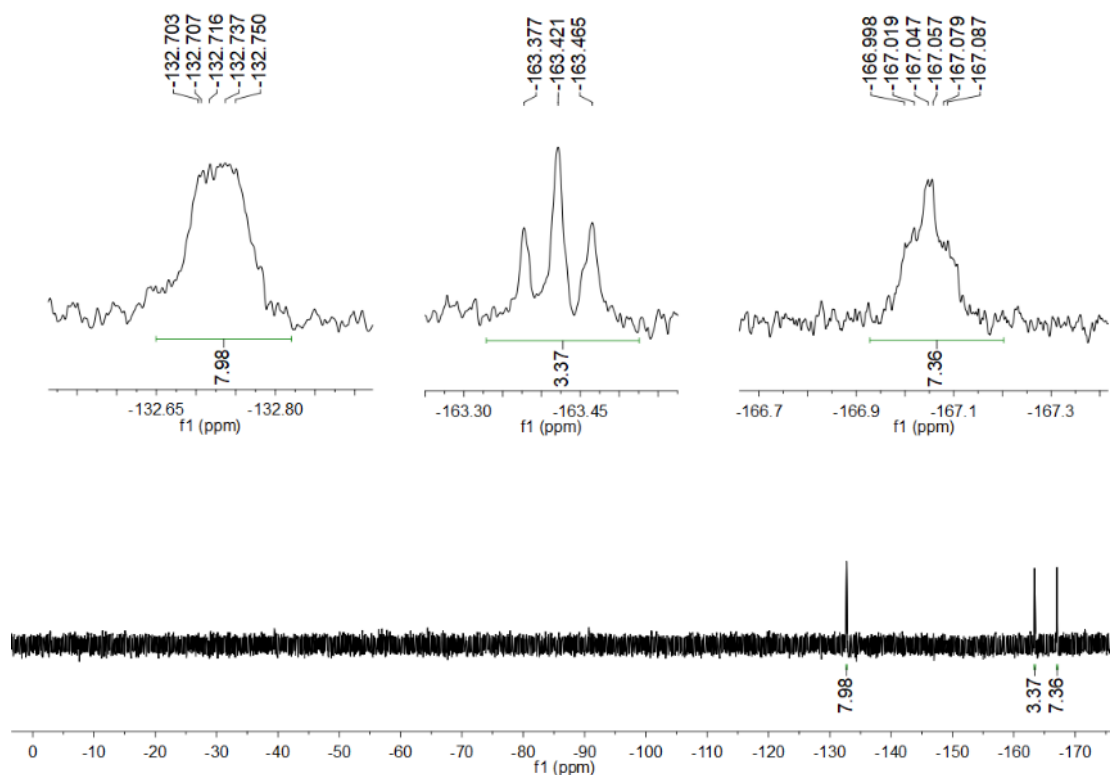

Fig. S7  $^{19}\text{F}$  NMR spectrum of  $2a\text{-BAr}^{\text{F}}$  in  $\text{CDCl}_3$ . \*Solvents or impurities

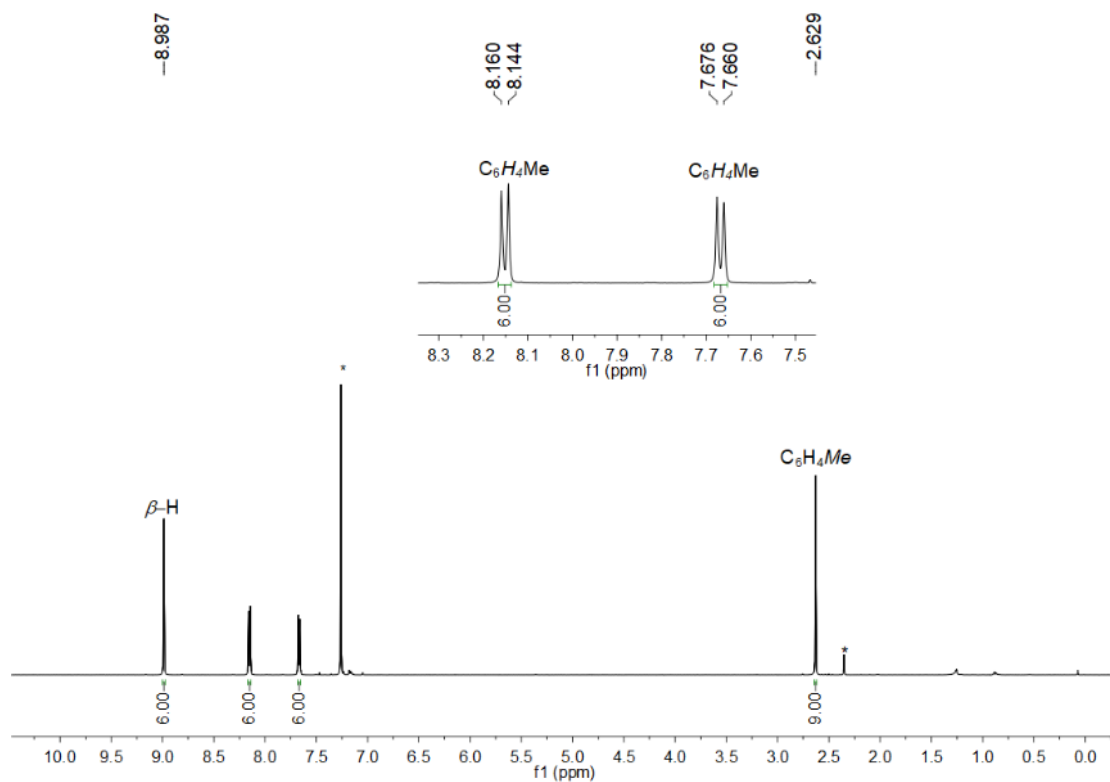

Fig. S8  $^1\text{H}$  NMR spectrum of  $2a\text{-SbF}_6$  in  $\text{CDCl}_3$ . \*Solvents or impurities

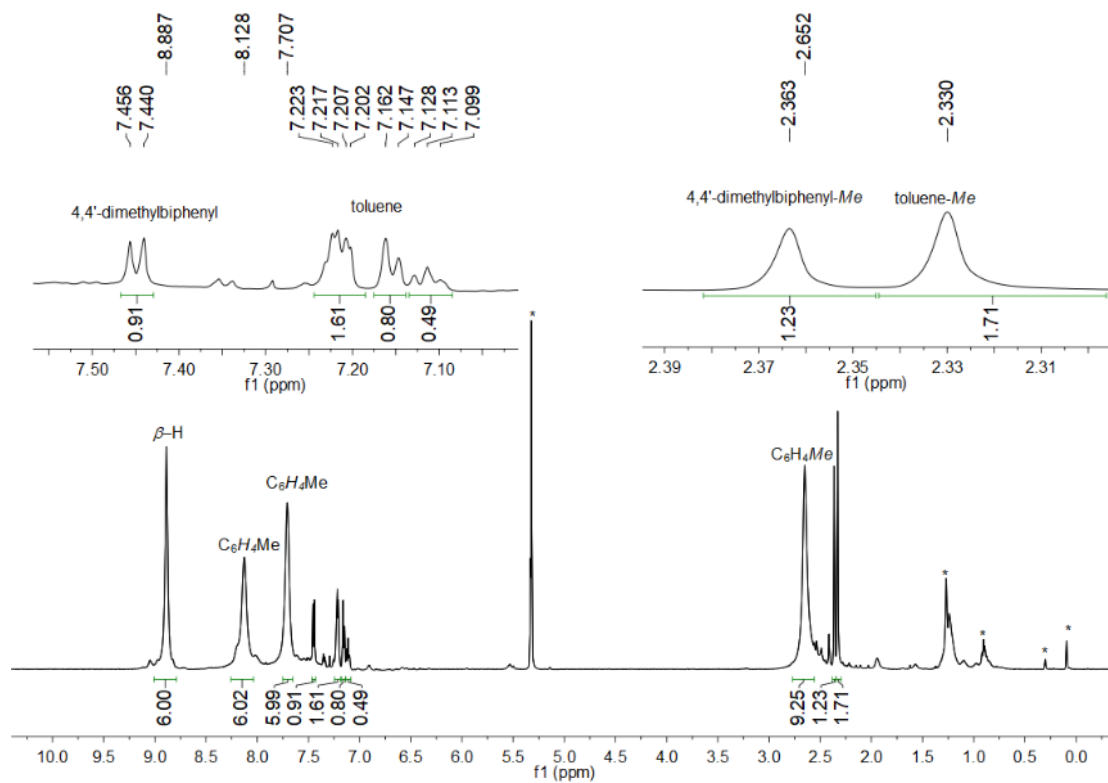

Fig. S9 *In situ*  $^1H$  NMR spectrum of **1a** with  $AgSbF_6$  (1 eq.) in  $CD_2Cl_2$ . \*Solvents or impurities

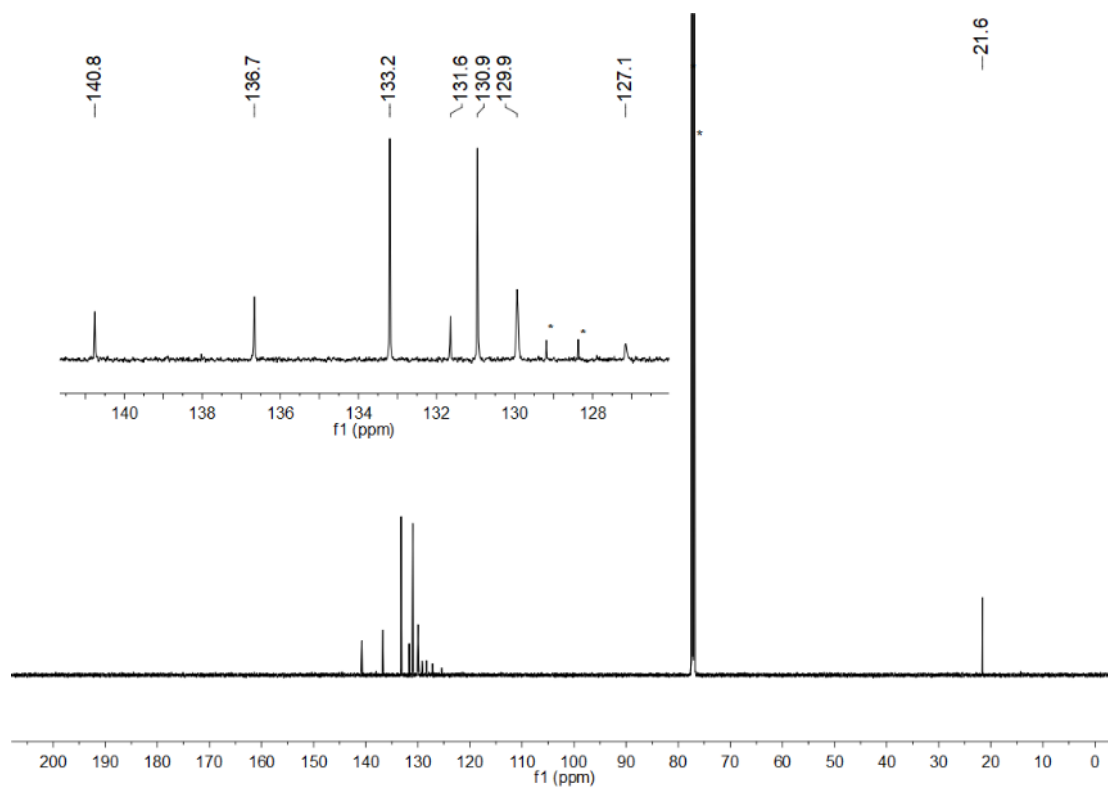

Fig. S10  $^{13}C$  NMR spectrum of **2a-SbF<sub>6</sub>** in  $CDCl_3$ . \*Solvents or impurities

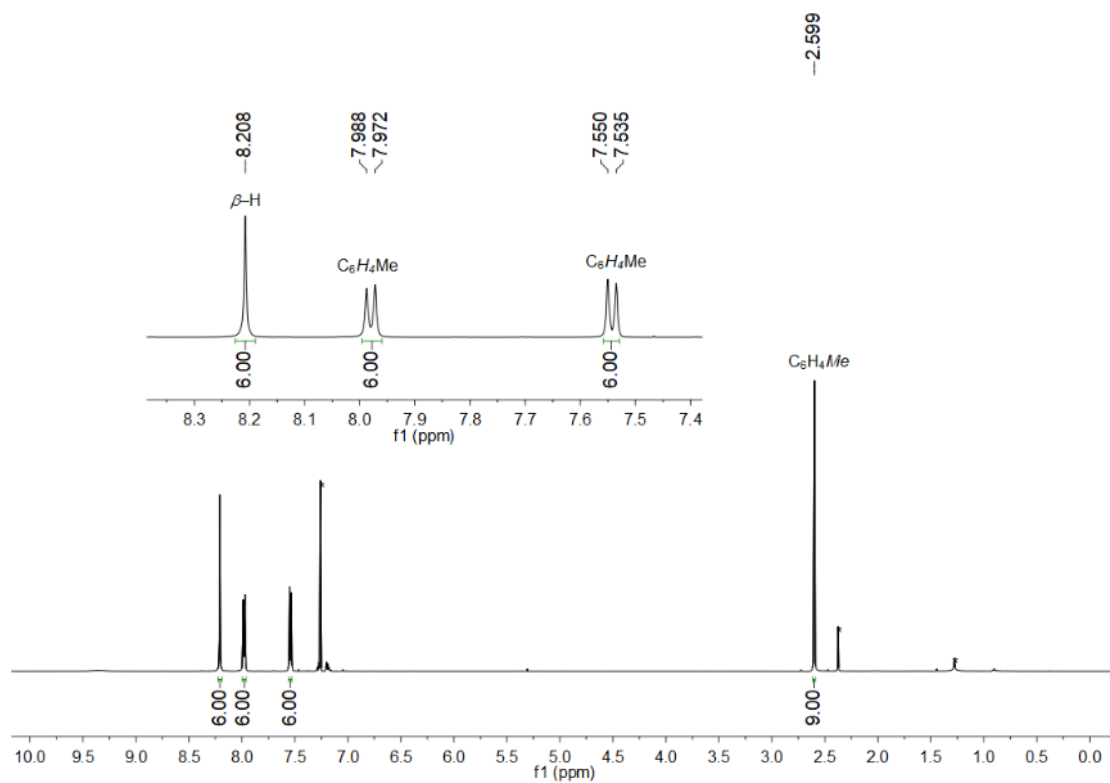

Fig. S11  $^1\text{H}$  NMR spectrum of **3a** in  $\text{CDCl}_3$ . \*Solvents or impurities

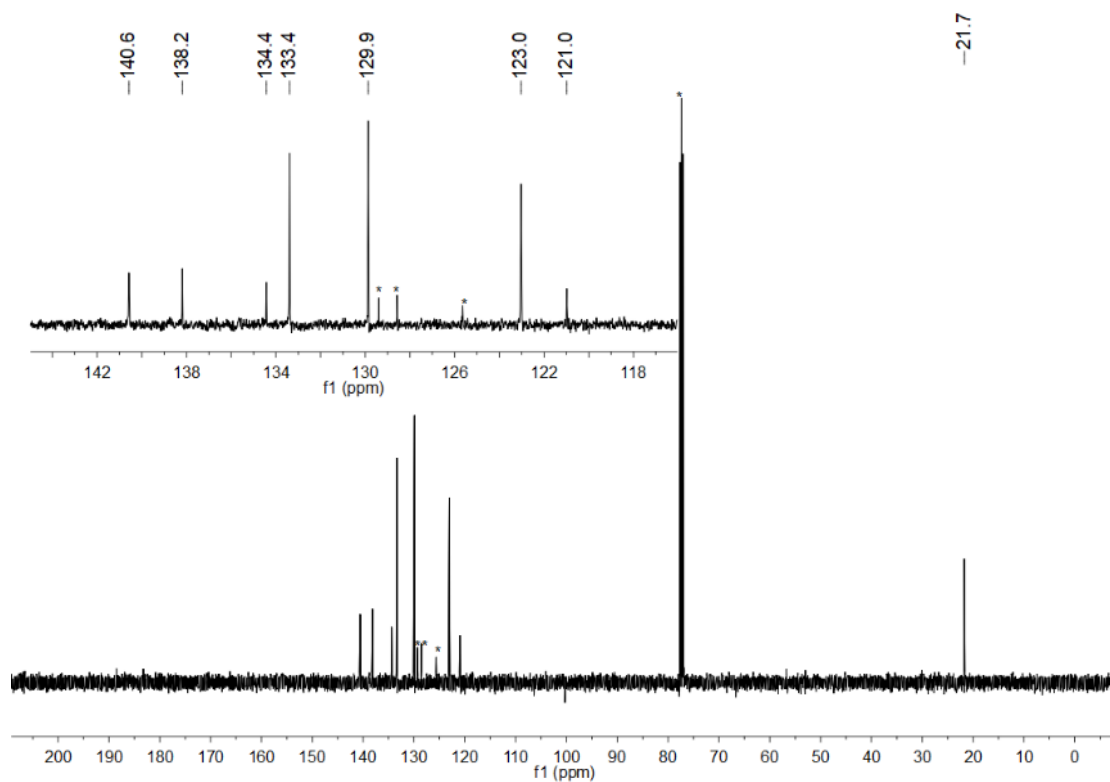

Fig. S12  $^{13}\text{C}$  NMR spectrum of **3a** in  $\text{CDCl}_3$ . \*Solvents or impurities



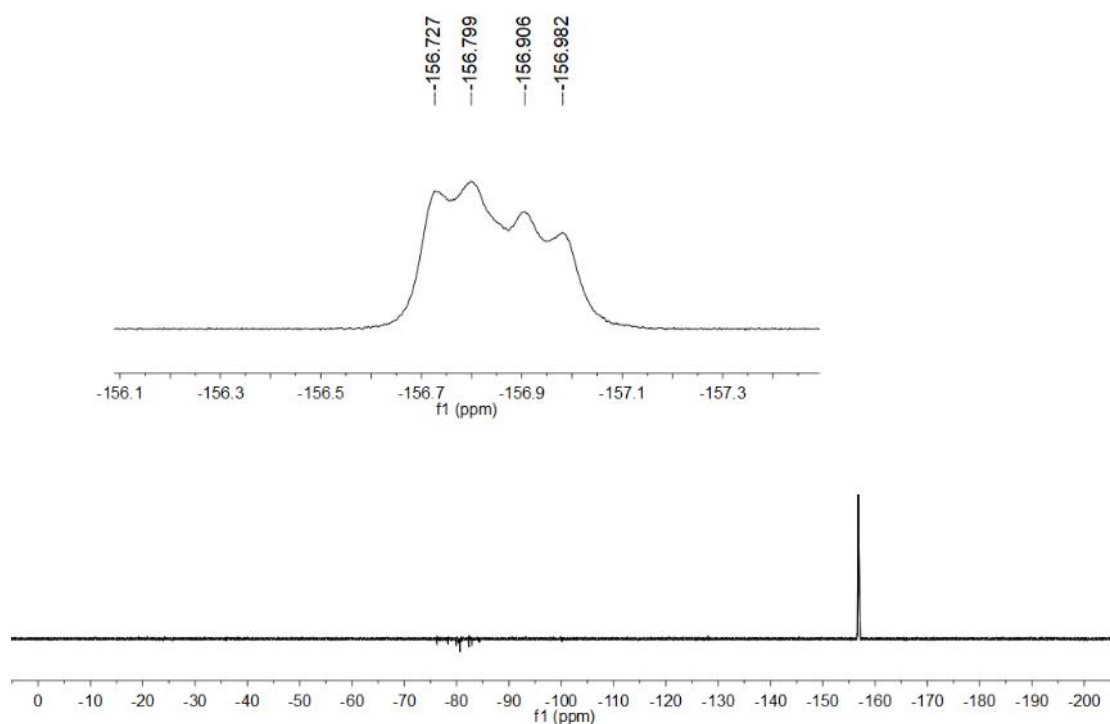

Fig. S13  $^{19}\text{F}$  NMR spectrum of **3a** in  $\text{CDCl}_3$ . \*Solvents or impurities

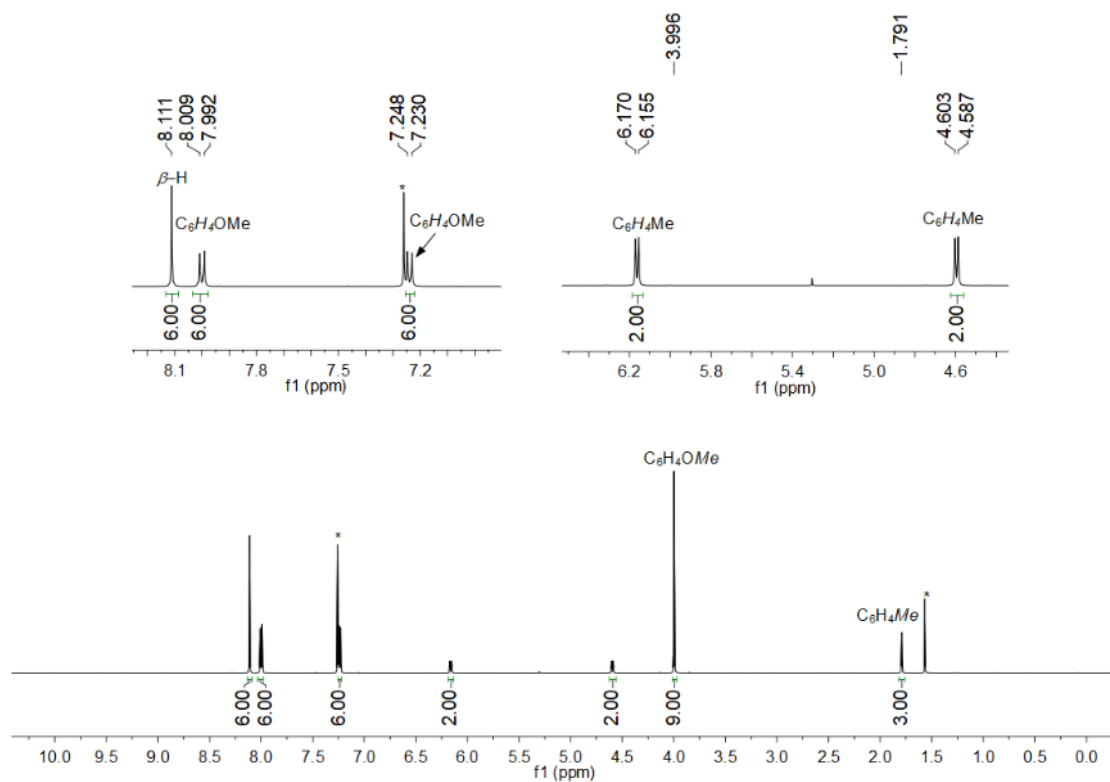

Fig. S14  $^1\text{H}$  NMR spectrum of **1b** in  $\text{CDCl}_3$ . \*Solvents or impurities

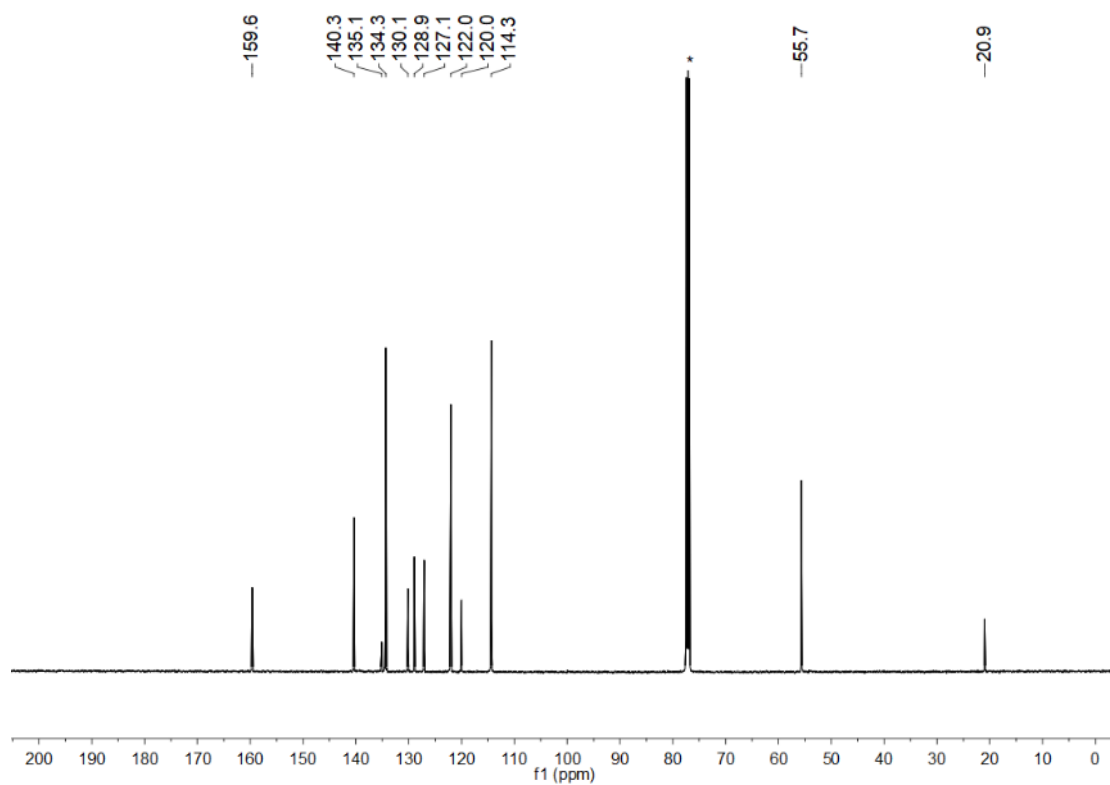

Fig. S15  $^{13}\text{C}$  NMR spectrum of **1b** in  $\text{CDCl}_3$ . \*Solvents or impurities

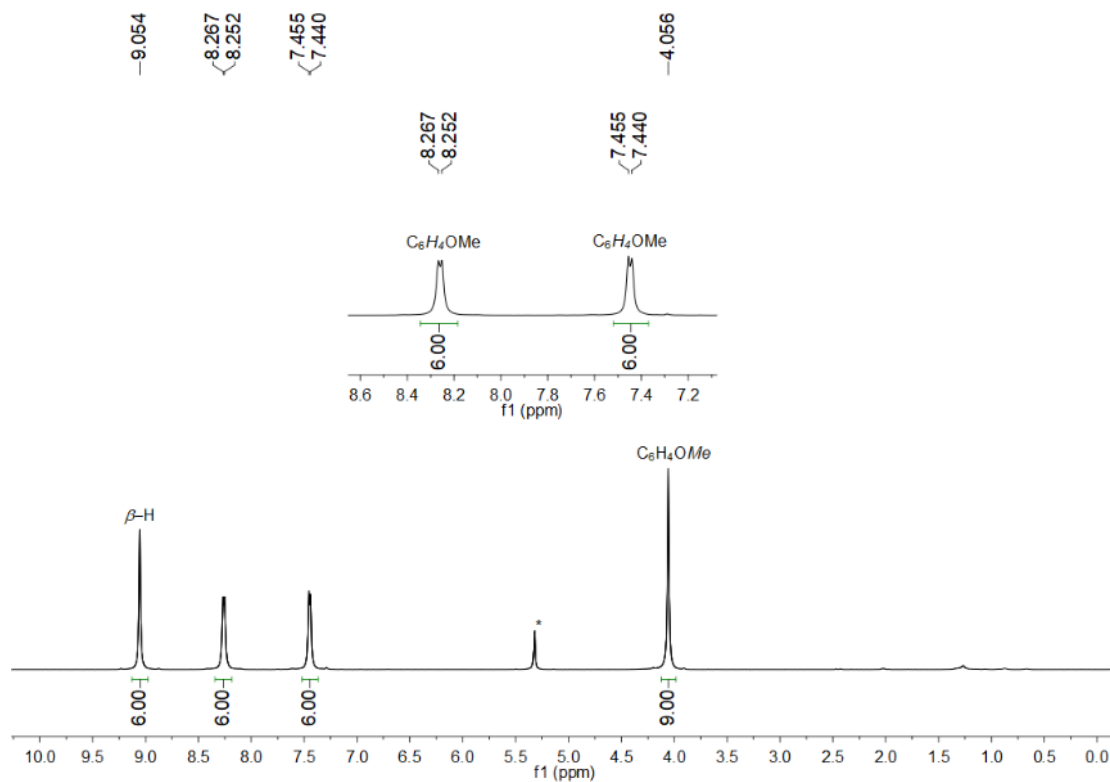

Fig. S16  $^1\text{H}$  NMR spectrum of **2b-SbF<sub>6</sub>** in  $\text{CD}_2\text{Cl}_2$ . \*Solvents or impurities

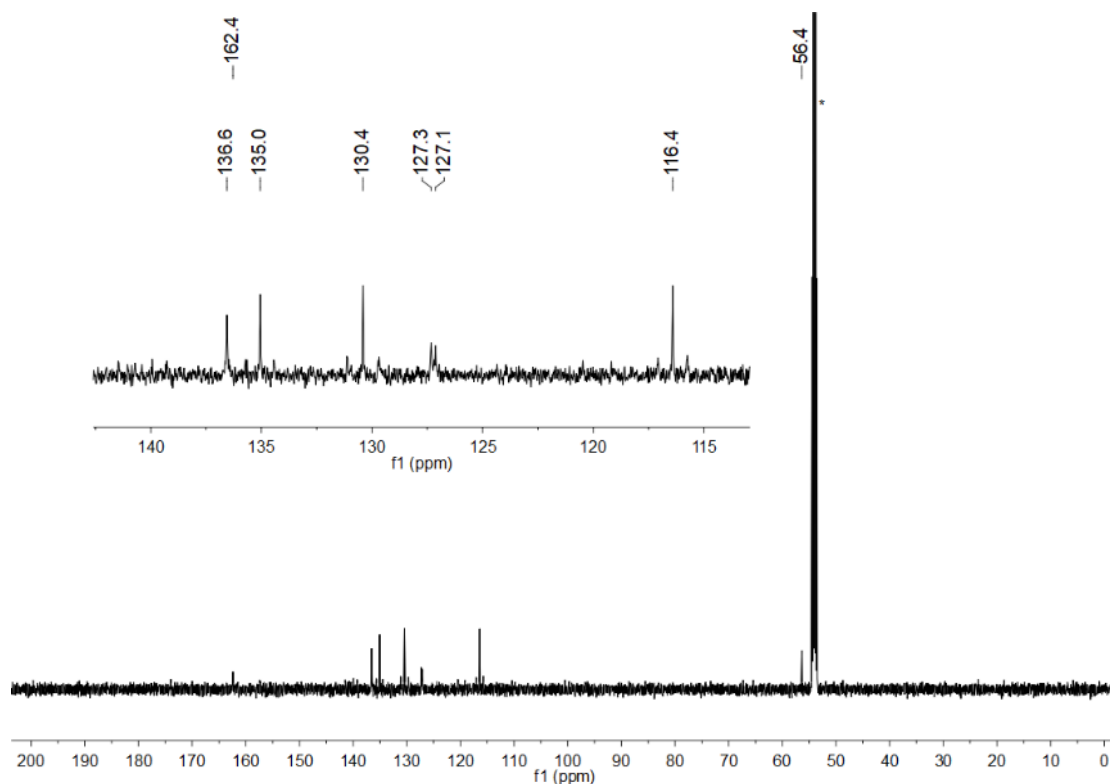

Fig. S17 <sup>13</sup>C NMR spectrum of **2b-SbF<sub>6</sub>** in CD<sub>2</sub>Cl<sub>2</sub>. \*Solvents or impurities

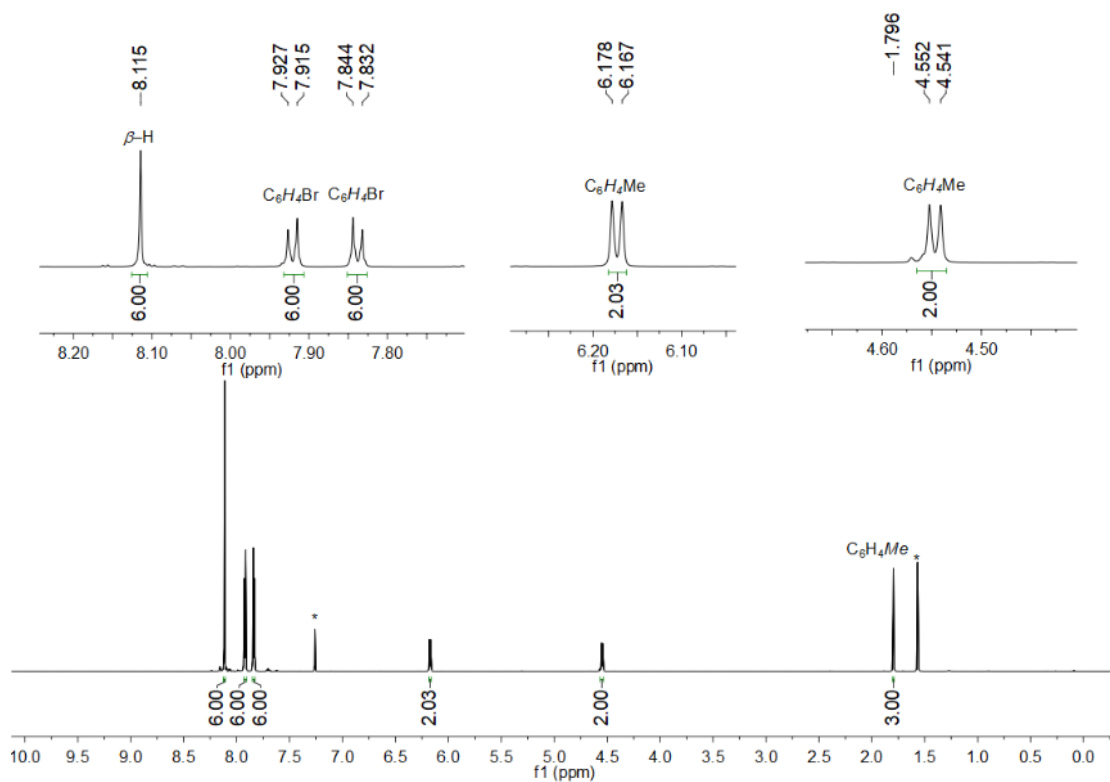

Fig. S18 <sup>1</sup>H NMR spectrum of **1c-Br** in CDCl<sub>3</sub>. \*Solvents or impurities

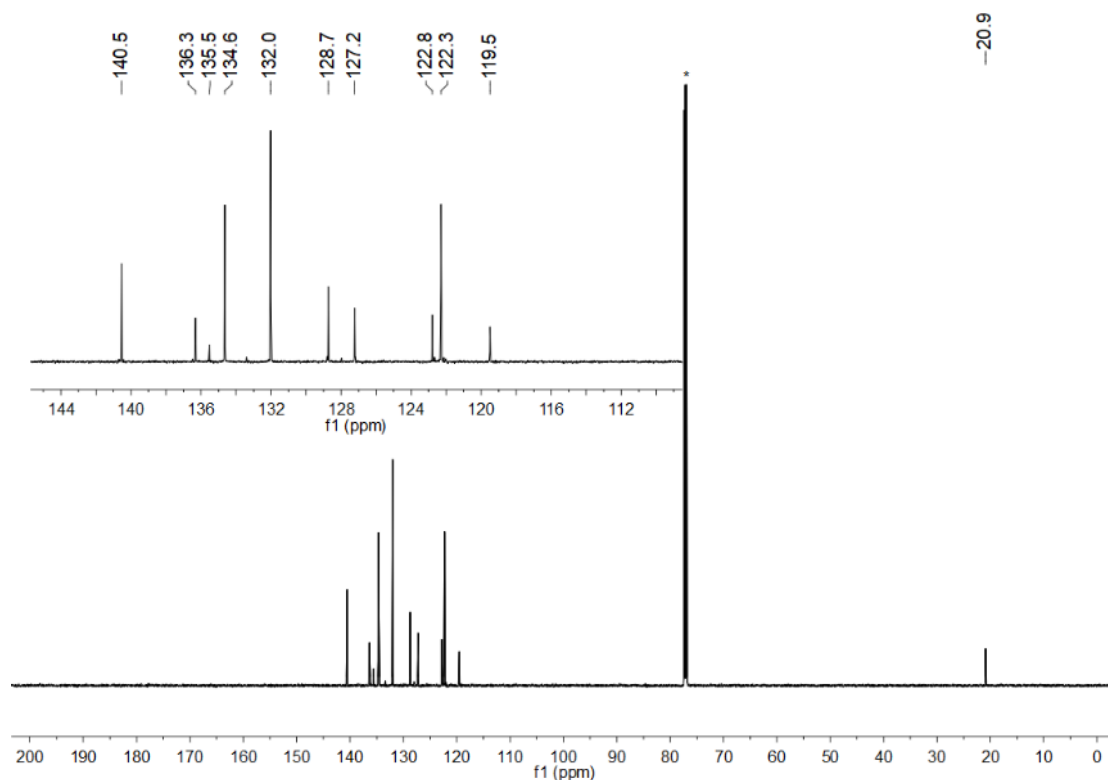

Fig. S19  $^{13}\text{C}$  NMR spectrum of **1c-Br** in  $\text{CDCl}_3$ . \*Solvents or impurities

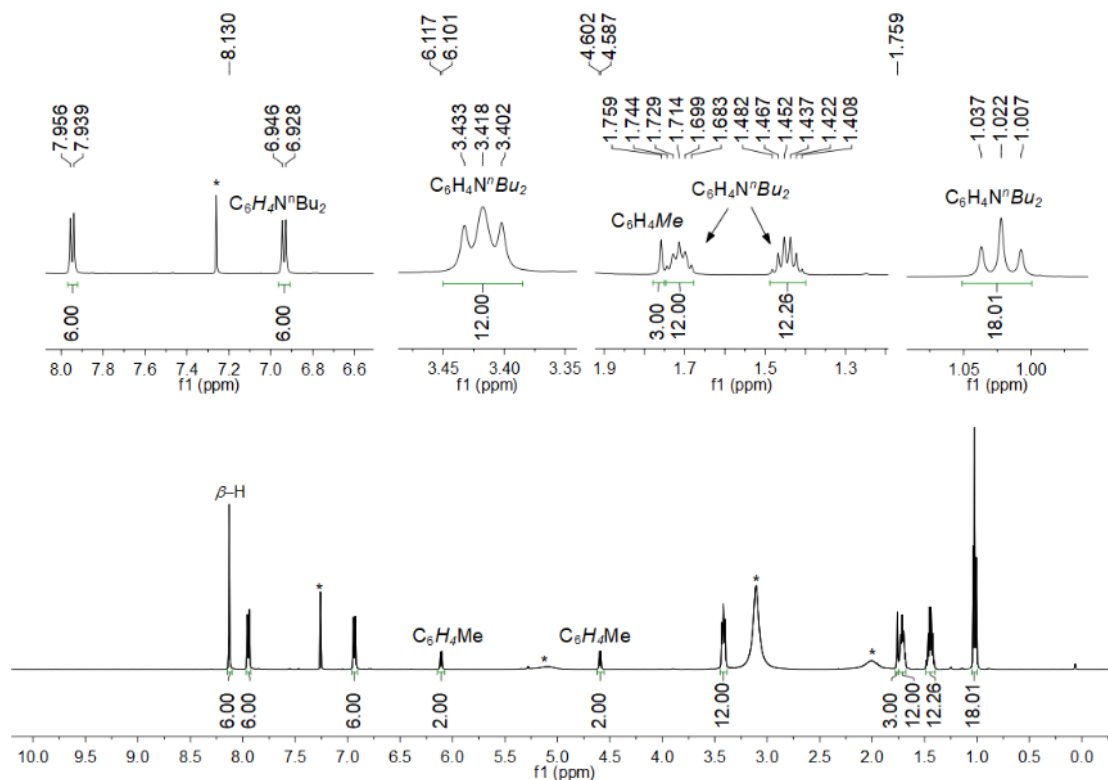

Fig. S20  $^1\text{H}$  NMR spectrum of **1c** in  $\text{CDCl}_3$  ( $\text{NH}_2\text{NH}_2 \cdot \text{H}_2\text{O}$ ). \*Solvents or impurities

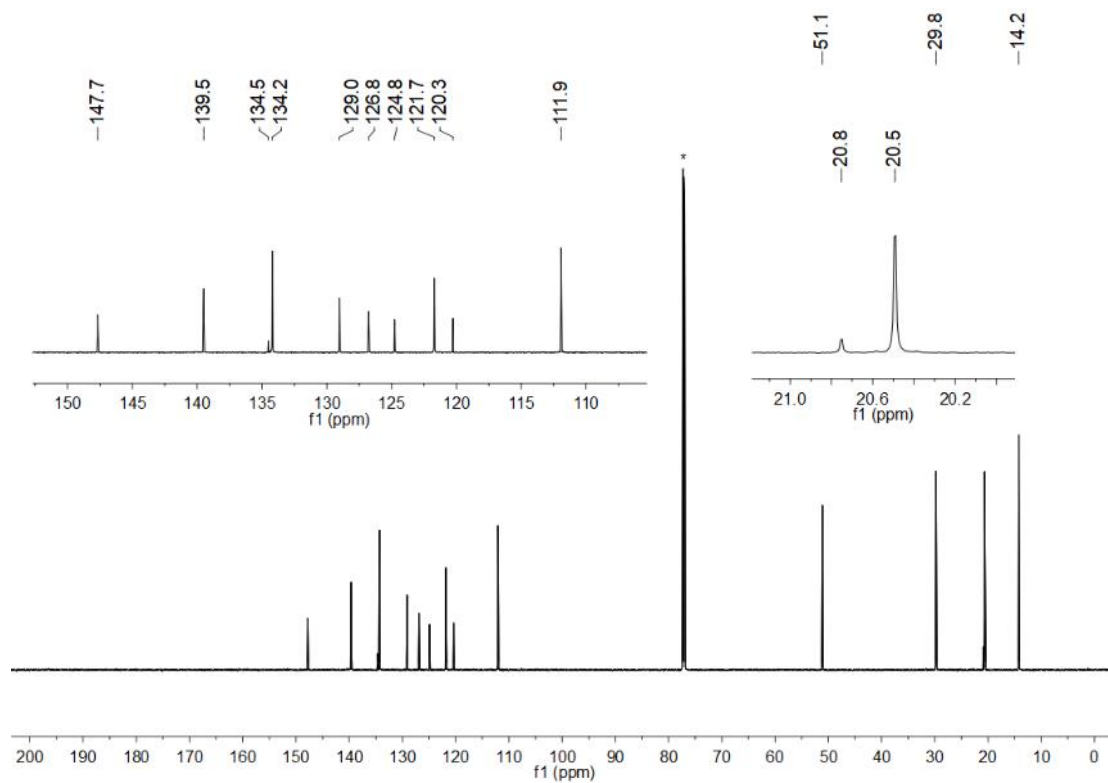

Fig. S21  $^{13}\text{C}$  NMR spectrum of **1c** in  $\text{CDCl}_3$  ( $\text{NH}_2\text{NH}_2 \cdot \text{H}_2\text{O}$ ). \*Solvents or impurities

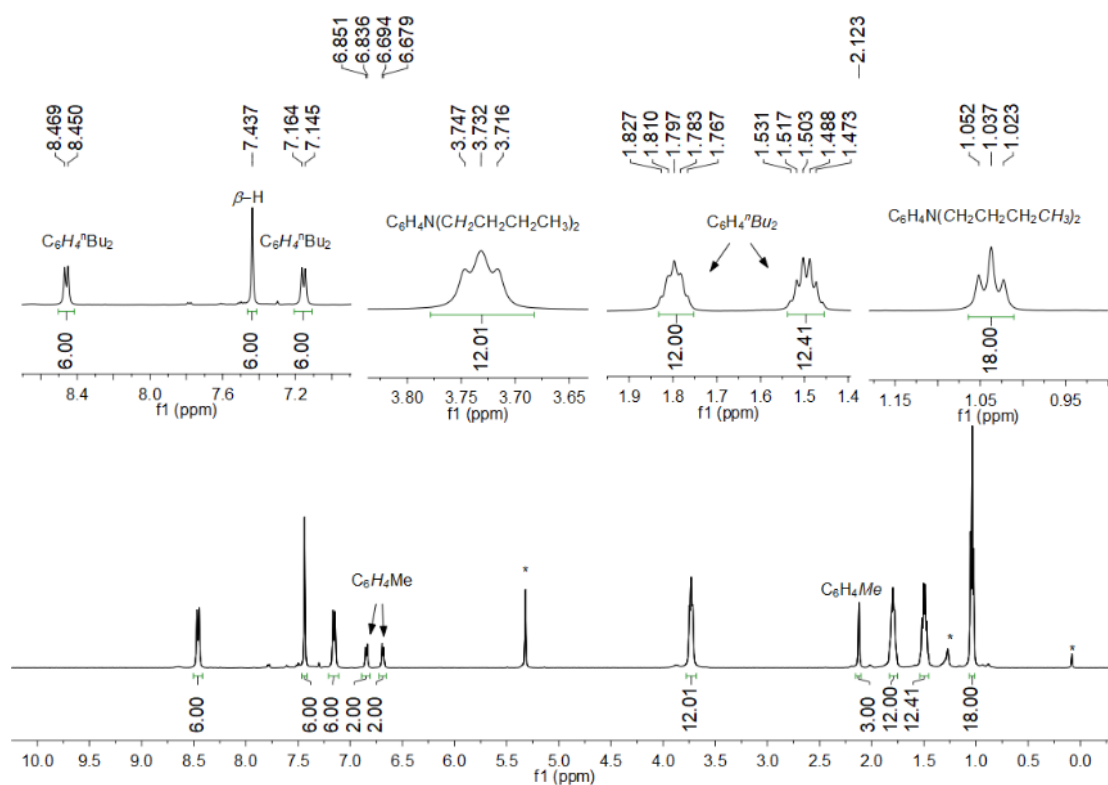

Fig. S22  $^1\text{H}$  NMR spectrum of **7c** in  $\text{CD}_2\text{Cl}_2$ . \*Solvents or impurities

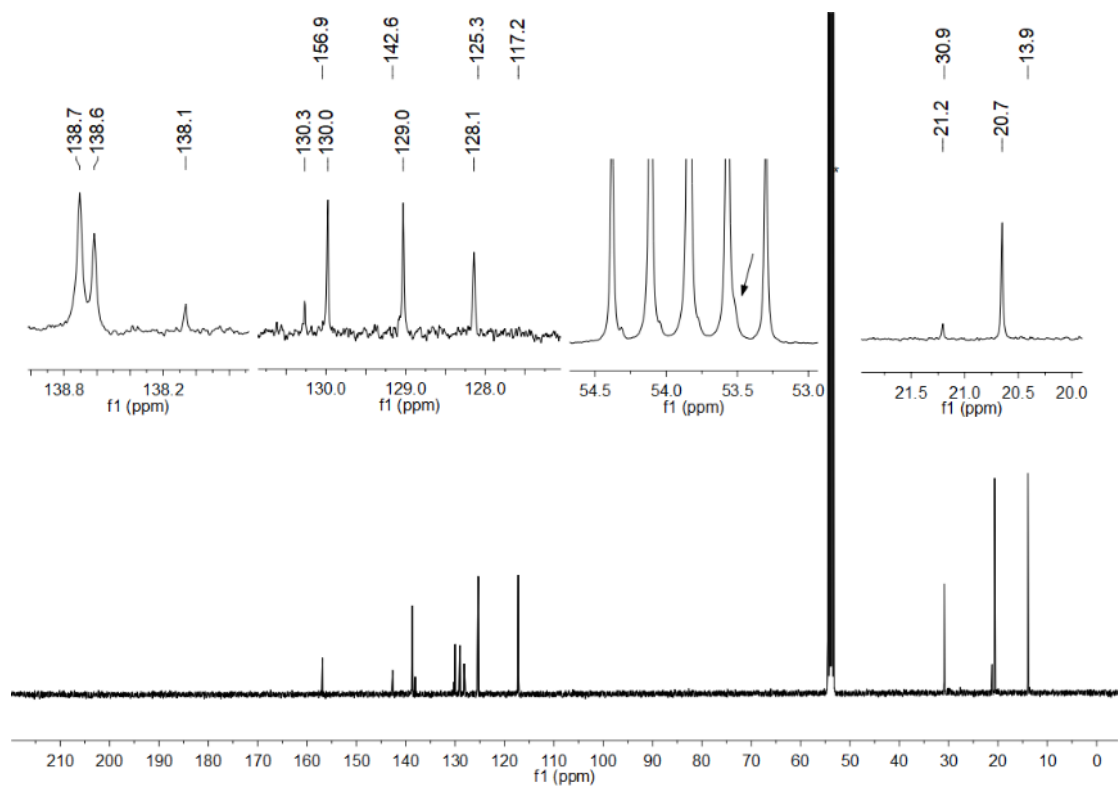

Fig. S23 <sup>13</sup>C NMR spectrum of 7c in CD<sub>2</sub>Cl<sub>2</sub>. \*Solvents or impurities

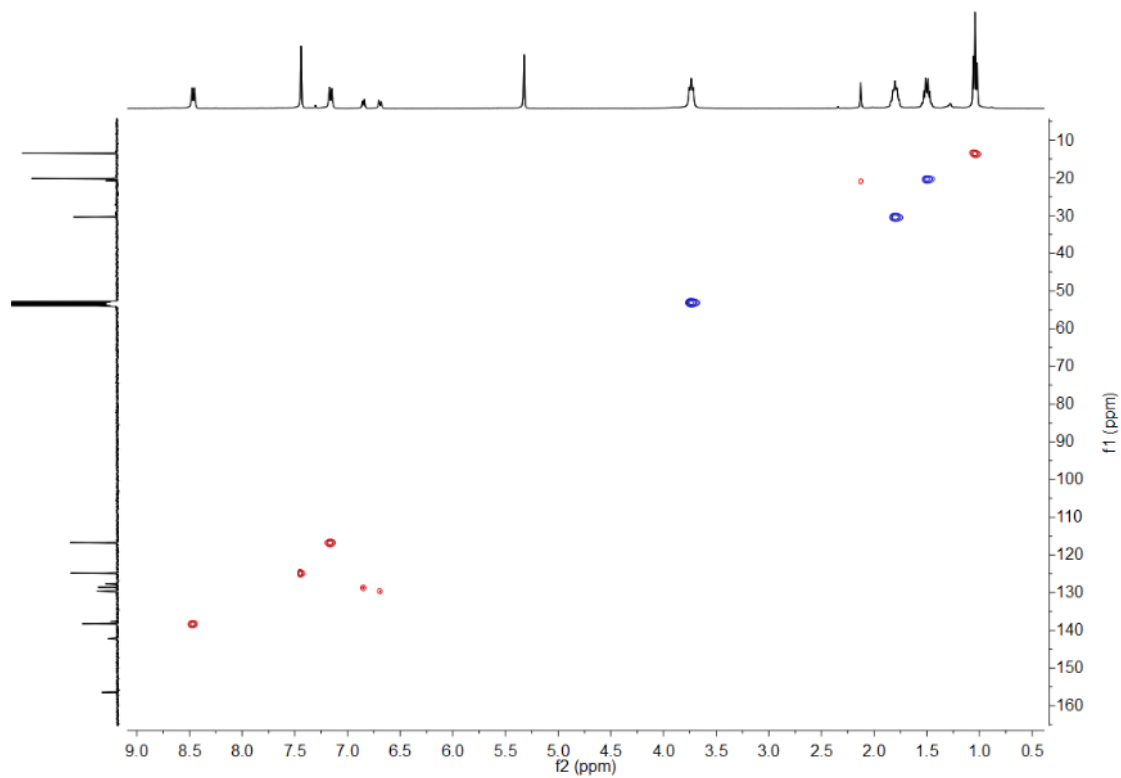

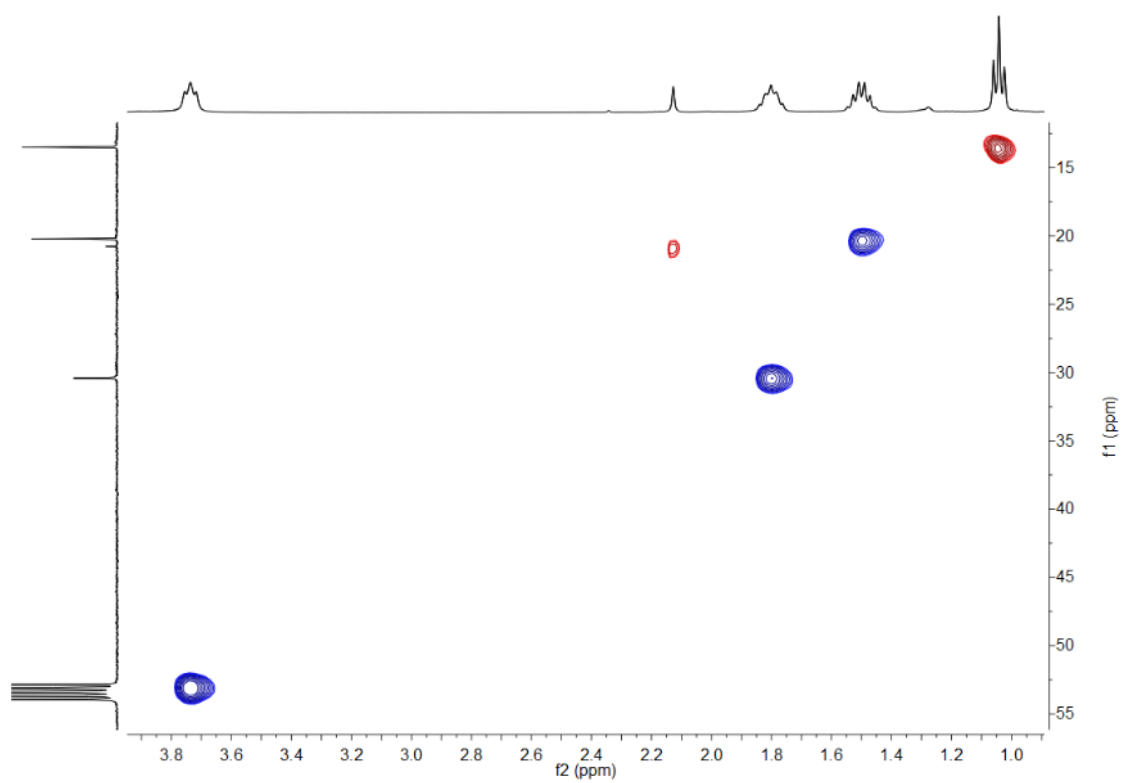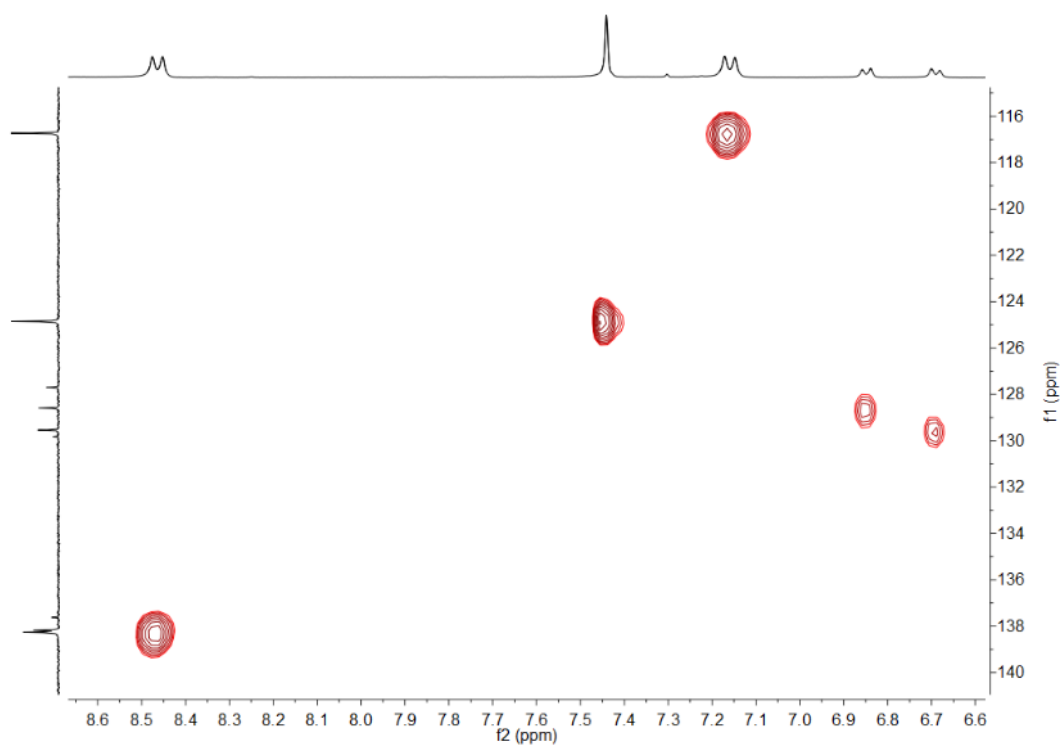

**Fig. S24** Phase sensitive HSQC spectrum of 7c in CD<sub>2</sub>Cl<sub>2</sub>. Red signals indicate the signals of CH and CH<sub>3</sub> while blue signals indicate signals of CH<sub>2</sub>.

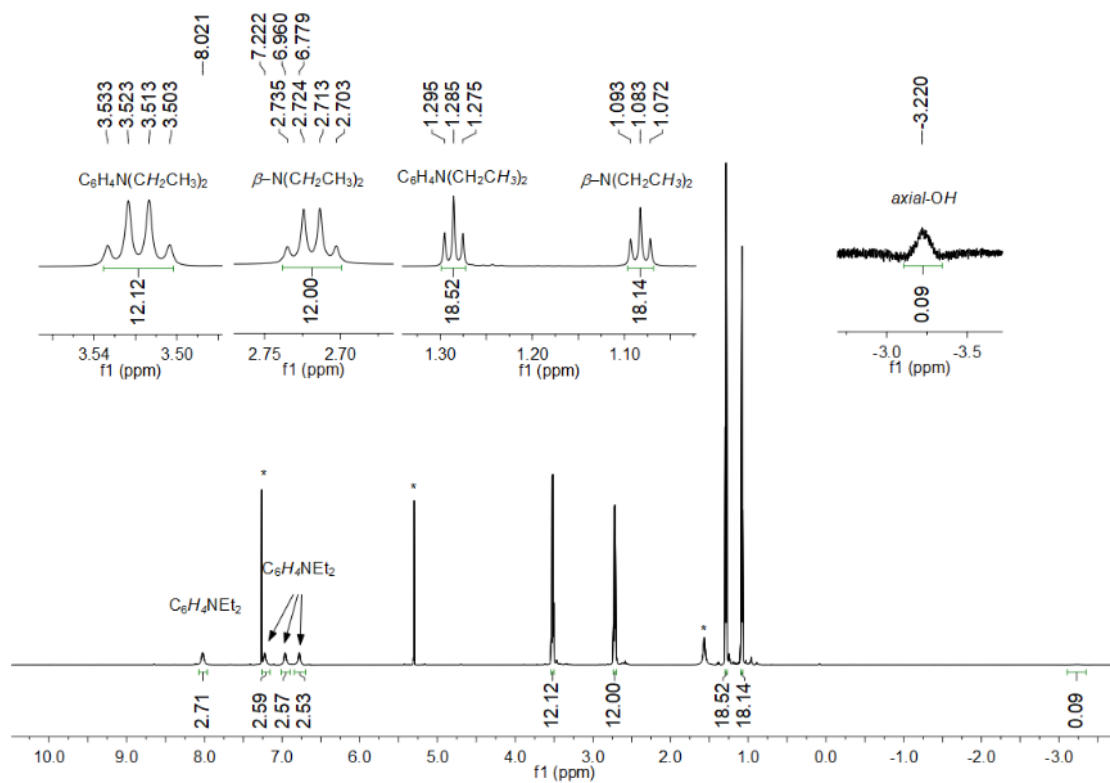

Fig. S25  $^1H$  NMR spectrum of **1d-OH** in  $CDCl_3$ . \*Solvents or impurities

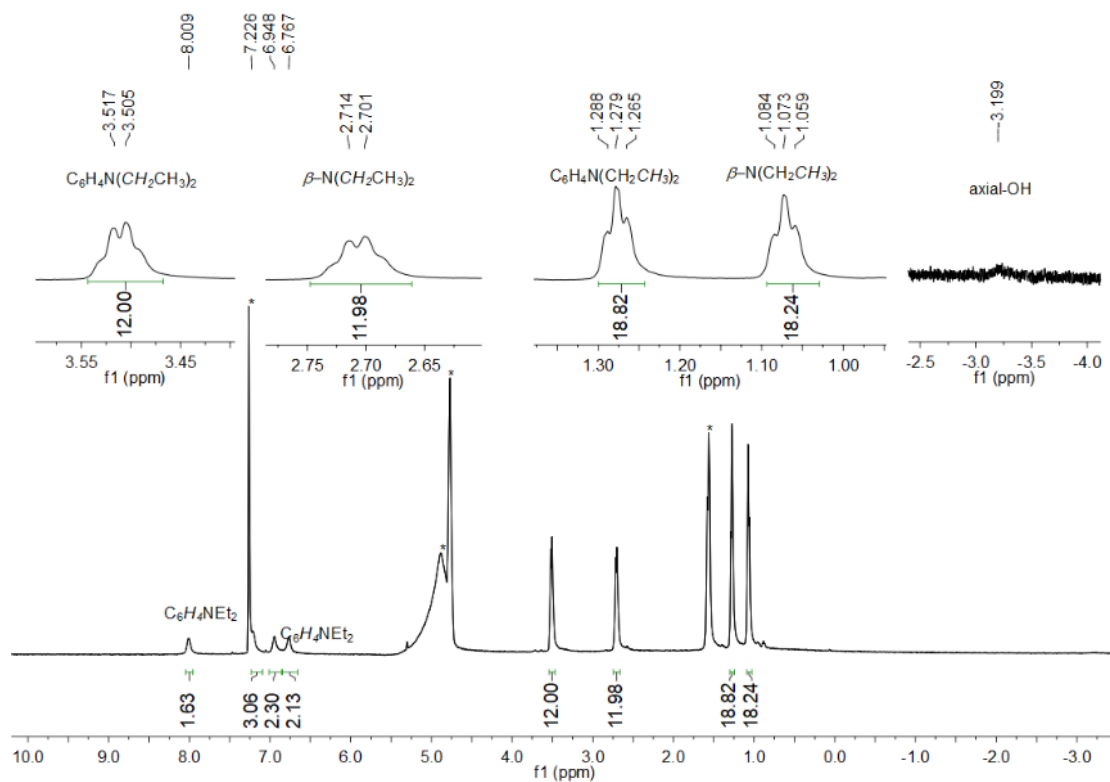

Fig. S26  $^1H$  NMR spectrum of **1d-OH** ( $D_2O$  exchange) in  $CDCl_3$ . \*Solvents or impurities



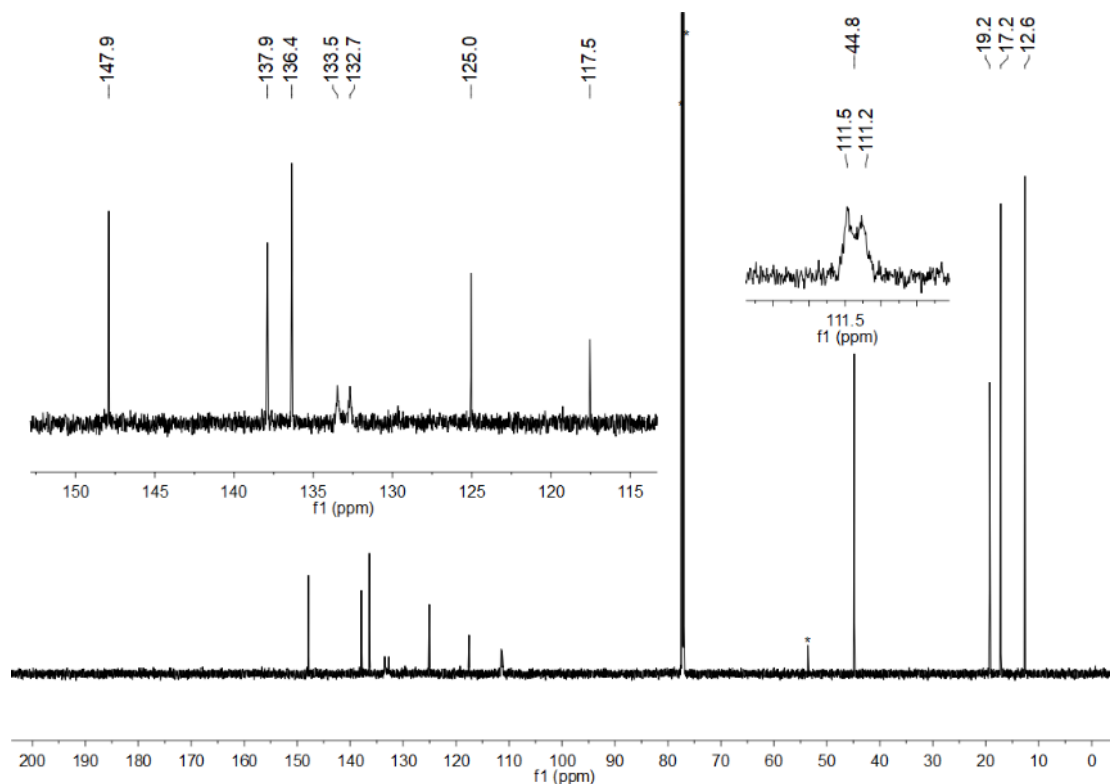

Fig. S27  $^{13}\text{C}$  NMR spectrum of **1d-OH** in  $\text{CDCl}_3$ . \*Solvents or impurities

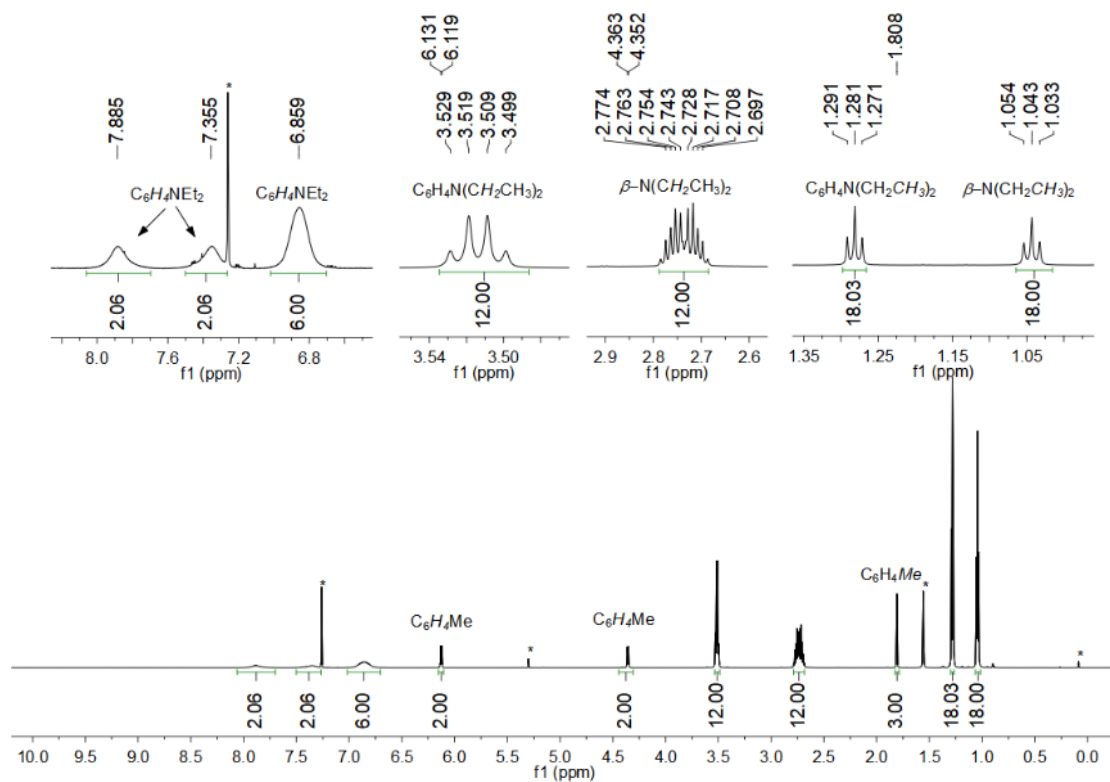

Fig. S28  $^1\text{H}$  NMR spectrum of **1d** in  $\text{CDCl}_3$ . \*Solvents or impurities

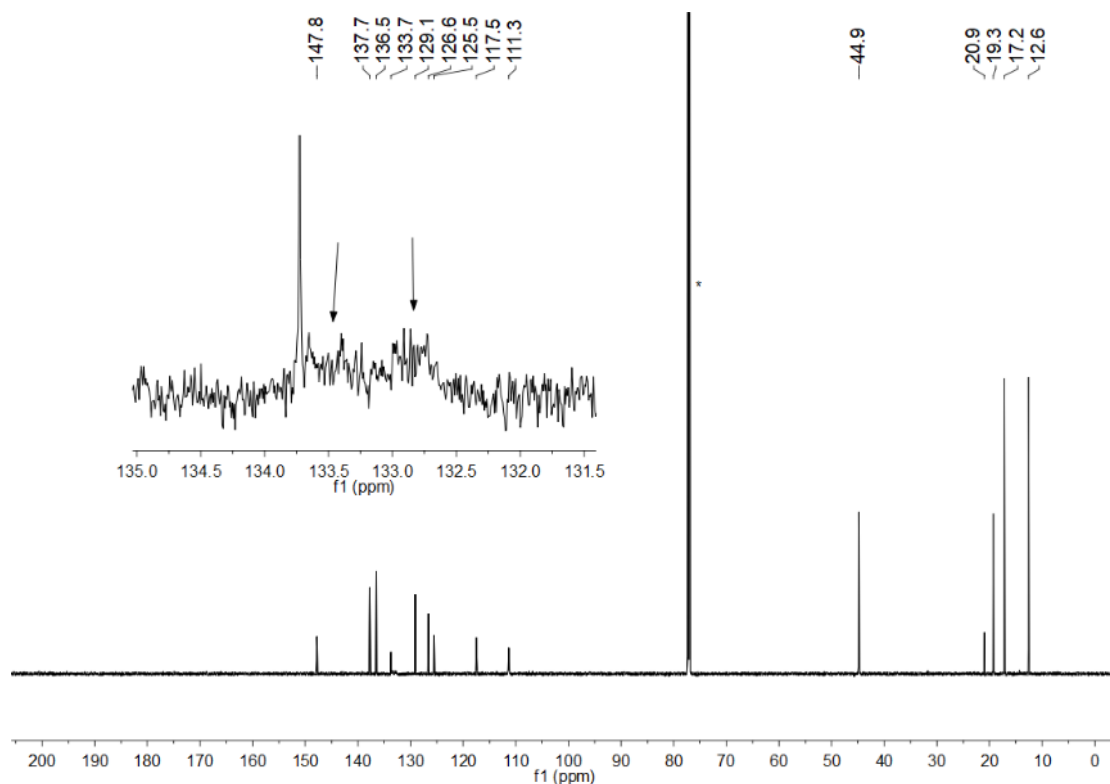

Fig. S29  $^{13}\text{C}$  NMR spectrum of **1d** in  $\text{CDCl}_3$ . \*Solvents or impurities

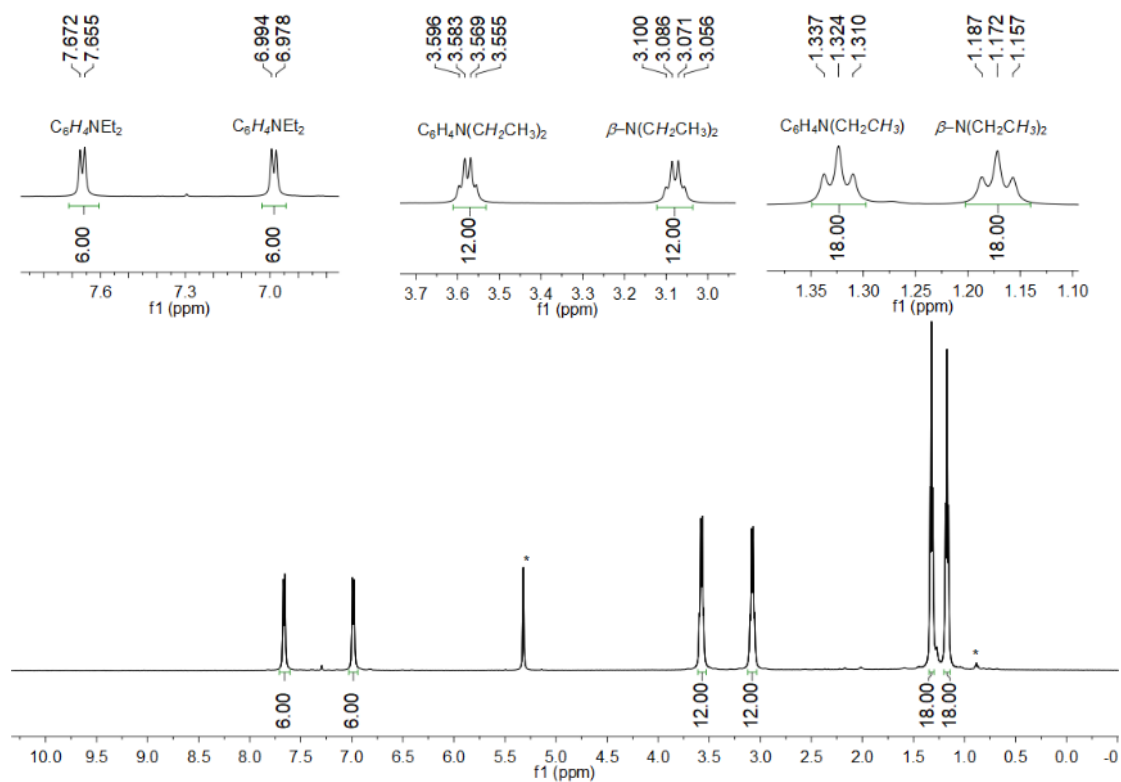

Fig. S30  $^1\text{H}$  NMR spectrum of **2d-SbF<sub>6</sub>** in  $\text{CD}_2\text{Cl}_2$ . \*Solvents or impurities

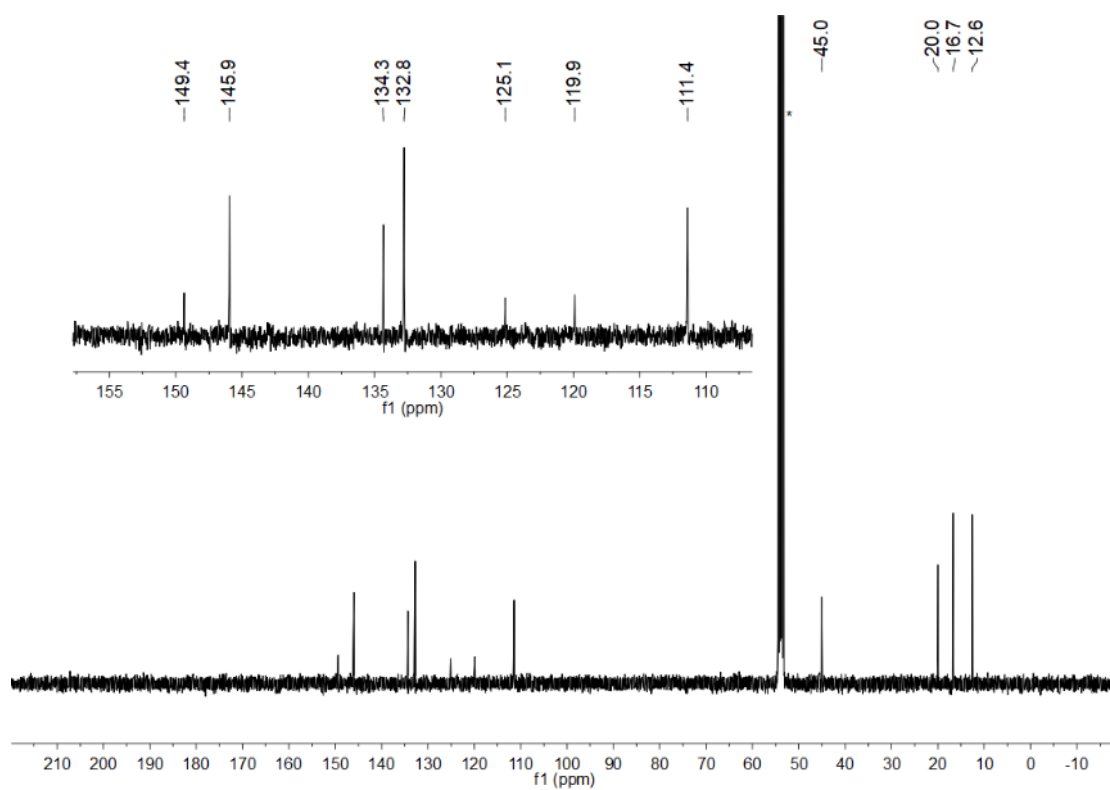

Fig. S31  $^{13}\text{C}$  NMR spectrum of  $2\text{d-SbF}_6$  in  $\text{CD}_2\text{Cl}_2$ . \*Solvents or impurities

## 4. UV-Vis-NIR Absorption Spectra

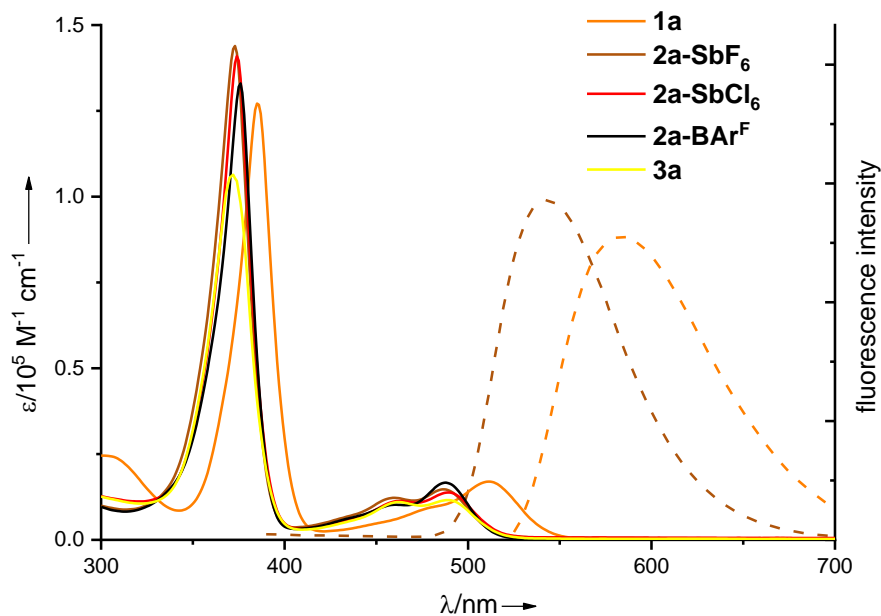

**Fig. S32** UV-Vis absorption spectra of **1a**, **2a-SbF<sub>6</sub>**, **2a-SbCl<sub>6</sub>**, **2a-BAr<sup>F</sup>** and **3a** and fluorescence emission spectra of **1a** and **2a-SbF<sub>6</sub>**. Solid lines represent UV-Vis absorption spectra and dashed lines represent fluorescence emission spectra.

**Table S1** UV-Vis absorption spectra data of **1a**, **2a-SbF<sub>6</sub>**, **2a-SbCl<sub>6</sub>**, **2a-BAr<sup>F</sup>**, and **3a**.

| Compound                   | $\lambda/\text{nm}$ | $\epsilon/10^5 \text{ M}^{-1} \text{ cm}^{-1}$ |
|----------------------------|---------------------|------------------------------------------------|
| <b>1a</b>                  | 386, 511            | 1.3, 0.17                                      |
| <b>2a-SbF<sub>6</sub></b>  | 373, 460, 487       | 1.4, 0.12, 0.15                                |
| <b>2a-BAr<sup>F</sup></b>  | 376, 461, 488       | 1.3, 0.10, 0.17                                |
| <b>3a</b>                  | 376, 461, 488       | 1.1, 0.11, 0.12                                |
| <b>2a-SbCl<sub>6</sub></b> | 374, 463, 489       | 1.4, 0.11, 0.14                                |

**Table S2** Fluorescence emission spectra data of **1a** and **2a-SbF<sub>6</sub>**.

| Compound                  | $\lambda/\text{nm}$ |
|---------------------------|---------------------|
| <b>1a</b>                 | 583                 |
| <b>2a-SbF<sub>6</sub></b> | 541                 |

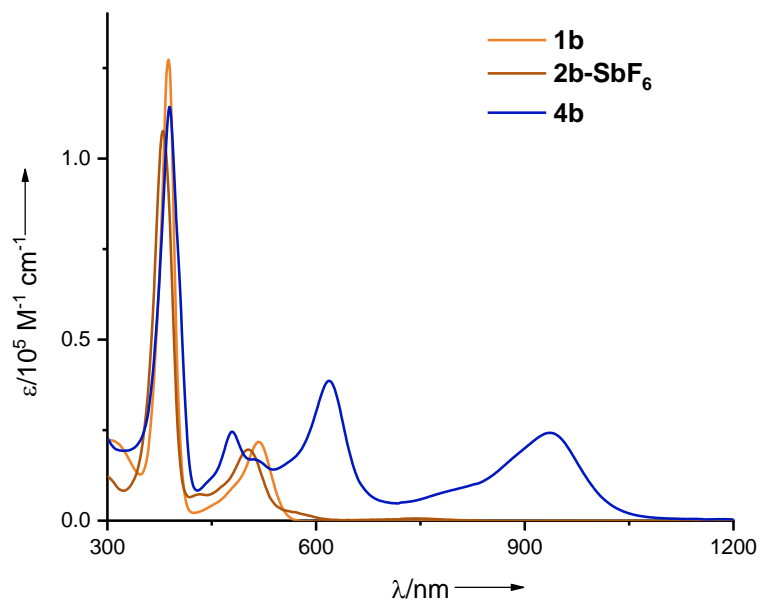

Fig. S33 UV-Vis absorption spectra of **1b**, **2b-SbF<sub>6</sub>** and **4b**.

Table S3. UV-Vis absorption spectra data of **1b**, **2b-SbF<sub>6</sub>** and **4b**.

| Compound                  | $\lambda/\text{nm}$     | $\epsilon / 10^5 \text{ M/cm}^{-1}$ |
|---------------------------|-------------------------|-------------------------------------|
| <b>1b</b>                 | 388, 518                | 1.3, 0.22                           |
| <b>2b-SbF<sub>6</sub></b> | 380, 503                | 1.1, 0.20                           |
| <b>4b</b>                 | 389, 479, 510, 619, 937 | 1.1, 0.25, 0.17, 0.39, 0.24         |

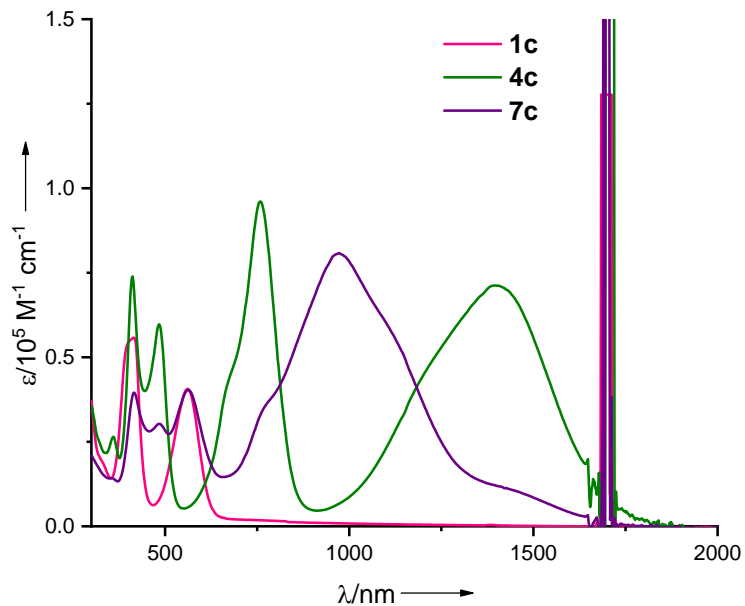

Fig. S34 UV-Vis absorption spectra of **1c**, **4c** and **7c**.

Table S4 UV-Vis absorption spectra data of **1c**, **4c** and **7c**.

| Compound  | $\lambda/\text{nm}$      | $\epsilon / 10^5 \text{ M/cm}^{-1}$ |
|-----------|--------------------------|-------------------------------------|
| <b>1c</b> | 416, 563                 | 0.56, 0.41                          |
| <b>4c</b> | 360, 412, 484, 758, 1394 | 0.26, 0.74, 0.60, 0.96, 0.71        |
| <b>7c</b> | 416, 484, 562, 972       | 0.40, 0.30, 0.40, 0.81              |

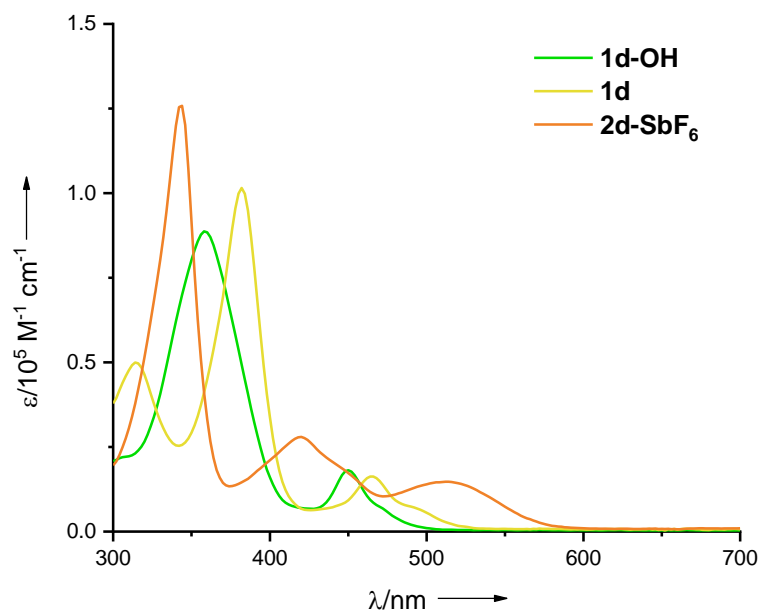

**Fig. S35** UV-Vis absorption spectra of **1d-OH**, **1d** and **2d-SbF<sub>6</sub>**.

**Table S5** UV-Vis absorption spectra data of **1d-OH**, **1d** and **2d-SbF<sub>6</sub>**.

| Compound                  | $\lambda/\text{nm}$ | $\epsilon / 10^5 \text{ M/cm}^{-1}$ |
|---------------------------|---------------------|-------------------------------------|
| <b>1d-OH</b>              | 358, 450            | 0.89, 0.18                          |
| <b>1d</b>                 | 314, 382, 466       | 0.50, 1.02, 0.16                    |
| <b>2d-SbF<sub>6</sub></b> | 344, 420, 512       | 1.26, 0.28, 0.15                    |

## 5. X-ray Crystallographic Data

Using Olex2<sup>[1]</sup>, structures of compound **2a-SbCl<sub>6</sub>**, **2a-BAr<sup>F</sup>**, **2a-SbF<sub>6</sub>**, **3a**, **1b**, **2b-SbF<sub>6</sub>**, **4b**, **1c**, **7c** and **2d-SbF<sub>6</sub>** were solved with the ShelXT<sup>[2]</sup> structure solution program using intrinsic phasing and refined with the ShelXL<sup>[3]</sup> refinement package using least squares minimisation. Twin law of **2b-SbF<sub>6</sub>** was found by using Platon. Disordered solvent molecules in **4b** and **7c** were treated by SQUEEZE<sup>[4]</sup> program of Platon.

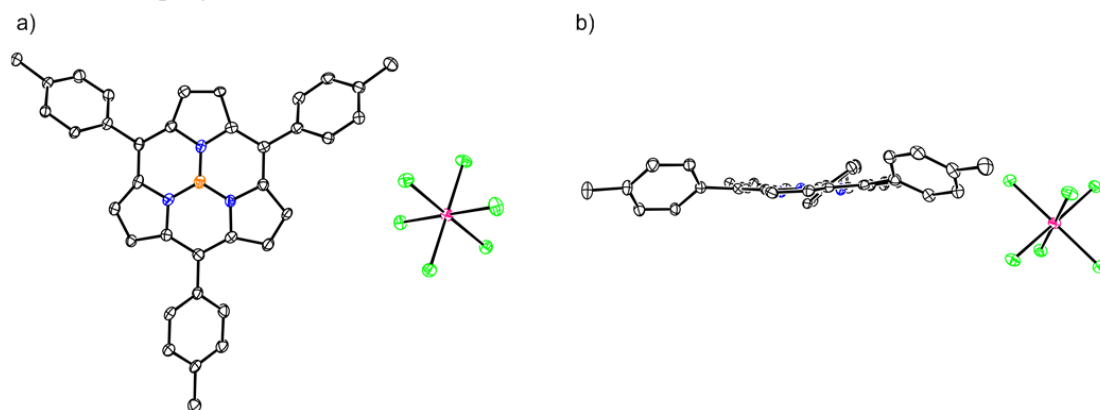

**Fig. S36** X-ray crystal structure of **2a-SbCl<sub>6</sub>**. a) Top view and b) side view. Thermal ellipsoids are scaled to 30% probability. Hydrogen atoms are omitted for clarity.

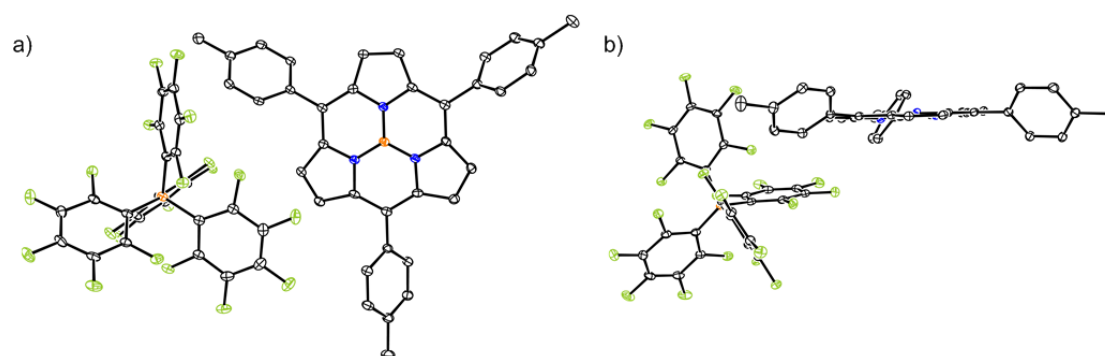

**Fig. S37** X-ray crystal structure of **2a-BAr<sup>F</sup>**. a) Top view and b) side view. Thermal ellipsoids are scaled to 30% probability. Hydrogen atoms are omitted for clarity.

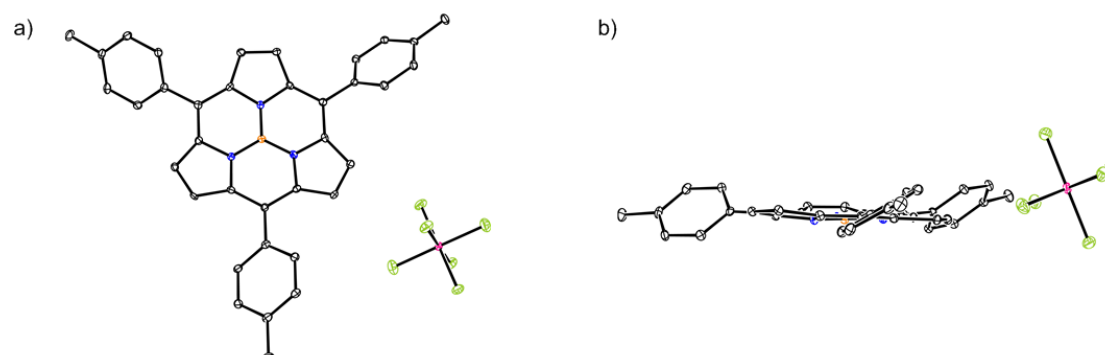

**Fig. S38** X-ray crystal structure of **2a-SbF<sub>6</sub>**. a) Top view and b) side view. Thermal ellipsoids are scaled to 30% probability. Hydrogen atoms are omitted for clarity.

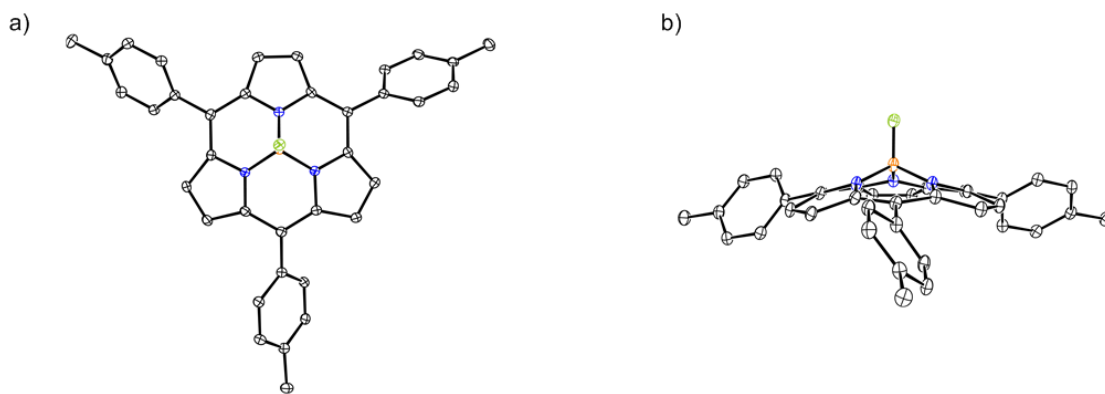

**Fig. S39** X-ray crystal structure of **3a**. a) Top view and b) side view. Thermal ellipsoids are scaled to 30% probability. Hydrogen atoms are omitted for clarity.

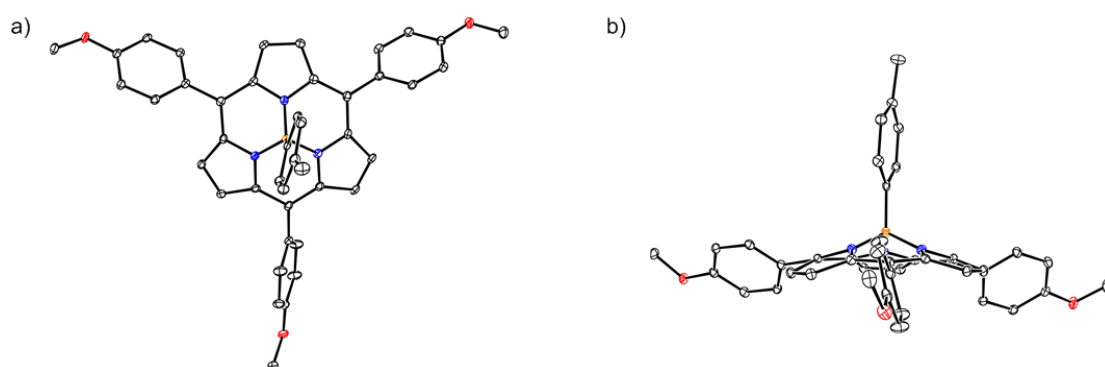

**Fig. S40** X-ray crystal structure of **1b**. a) Top view and b) side view. Thermal ellipsoids are scaled to 30% probability. Hydrogen atoms are omitted for clarity.

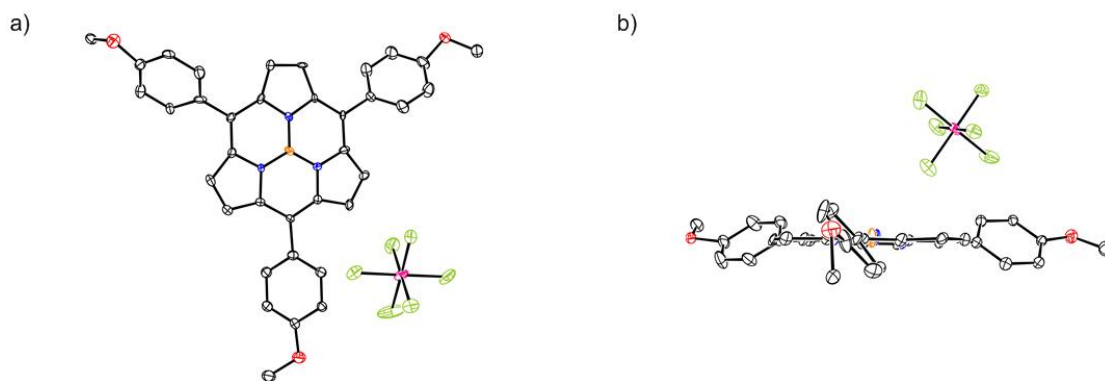

**Fig. S41** X-ray crystal structure of **2b-SbF<sub>6</sub>**. a) Top view and b) side view. Thermal ellipsoids are scaled to 30% probability. Hydrogen atoms are omitted for clarity.



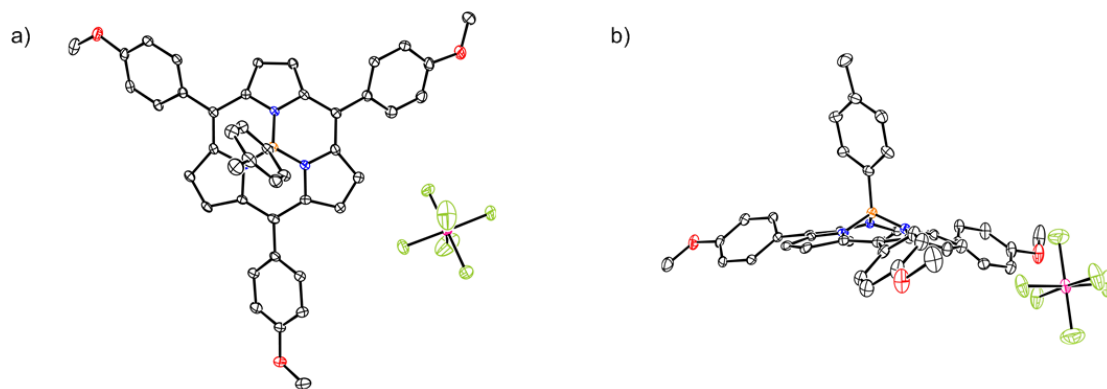

**Fig. S42** X-ray crystal structure of **4b**. a) Top view and b) side view. Thermal ellipsoids are scaled to 30% probability. Hydrogen atoms are omitted for clarity.

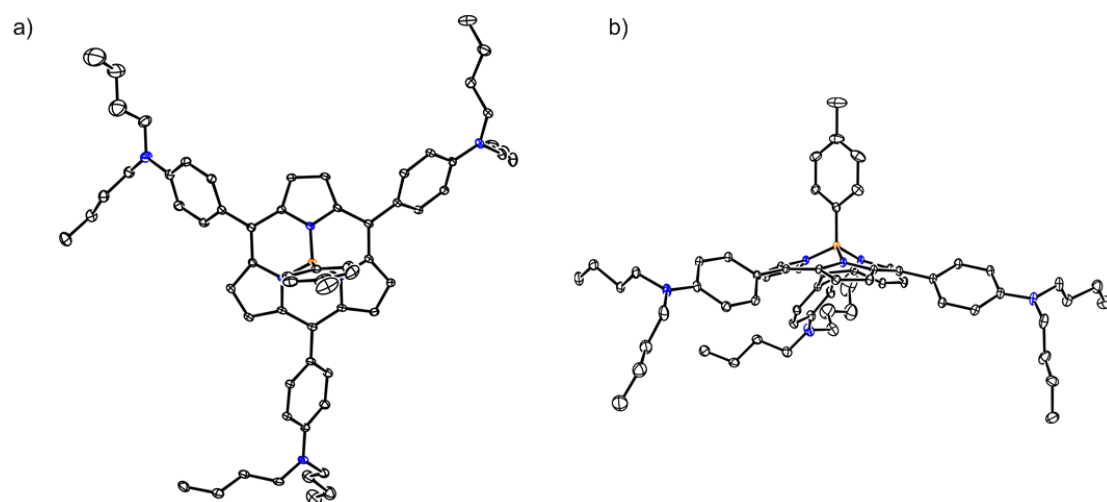

**Fig. S43** X-ray crystal structure of **1c**. a) Top view and b) side view. Thermal ellipsoids are scaled to 30% probability. Hydrogen atoms are omitted for clarity.

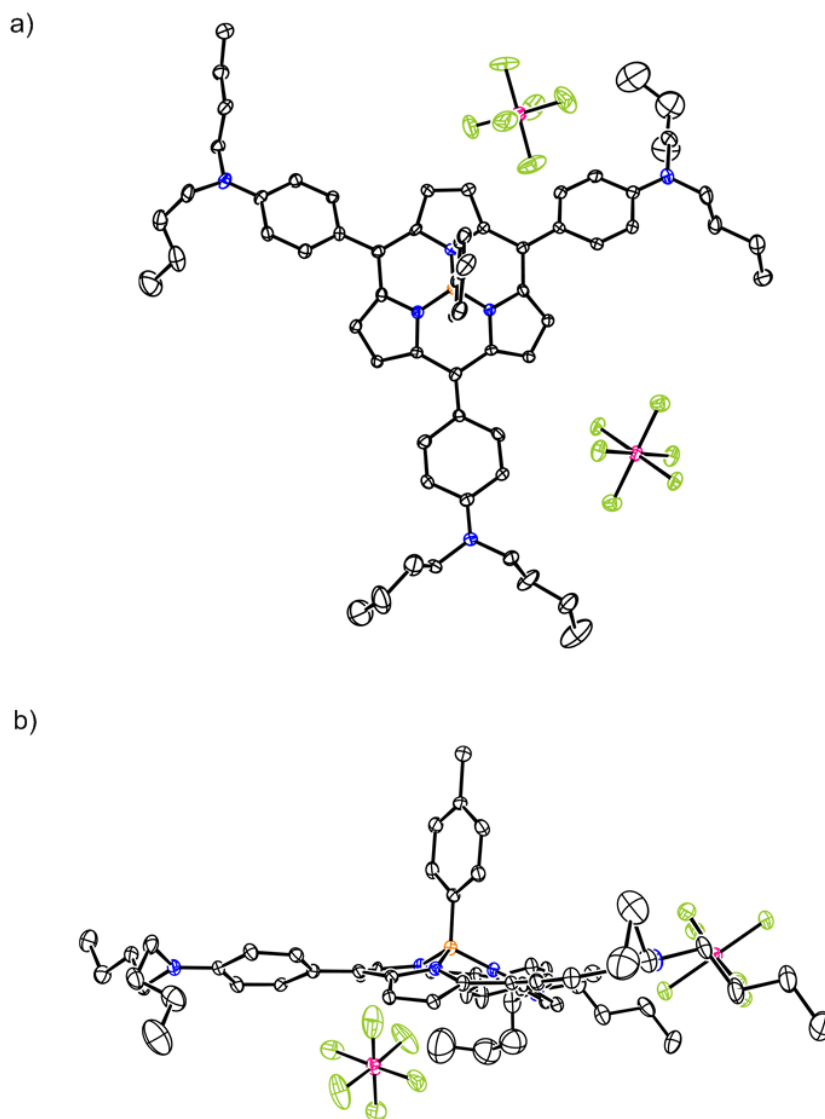

**Fig. S44** X-ray crystal structure of **7c**. a) Top view and b) side view. Thermal ellipsoids are scaled to 30% probability. Hydrogen atoms are omitted for clarity.

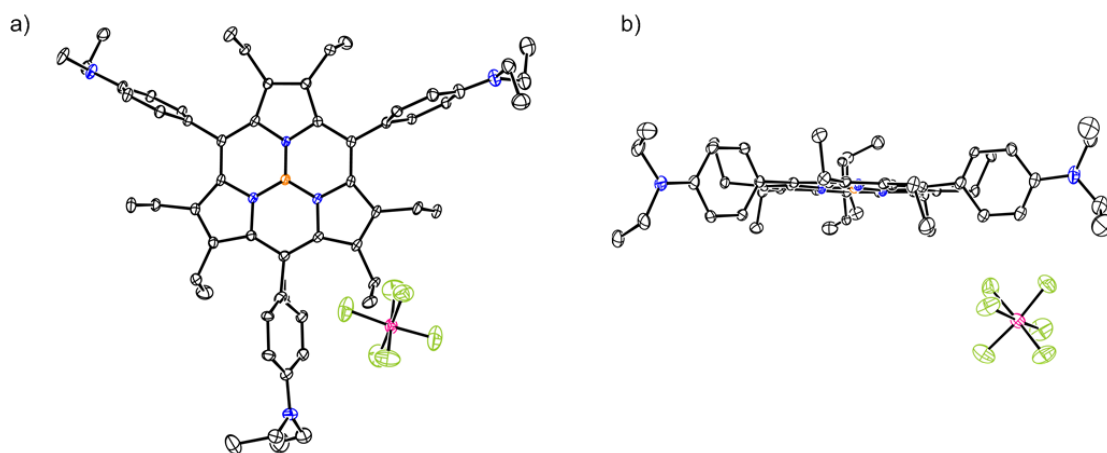

**Fig. S45** X-ray crystal structure of **2d-SbF<sub>6</sub>**. a) Top view and b) side view. Thermal ellipsoids are scaled to 30% probability. Hydrogen atoms are omitted for clarity.

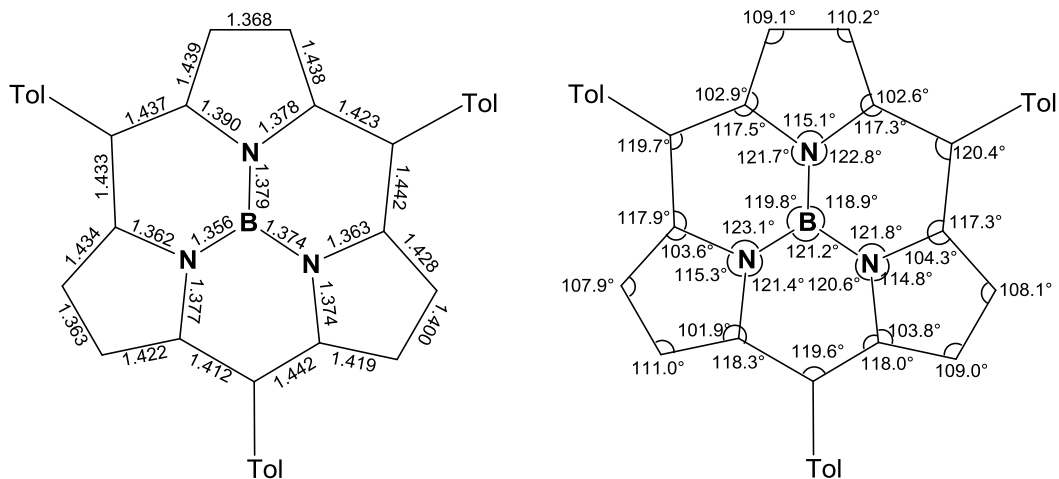

**Fig. S46** Selected bond lengths and bond angles of  $2a-SbCl_6$ . Bond lengths and bond angles are measured based on single crystal data.

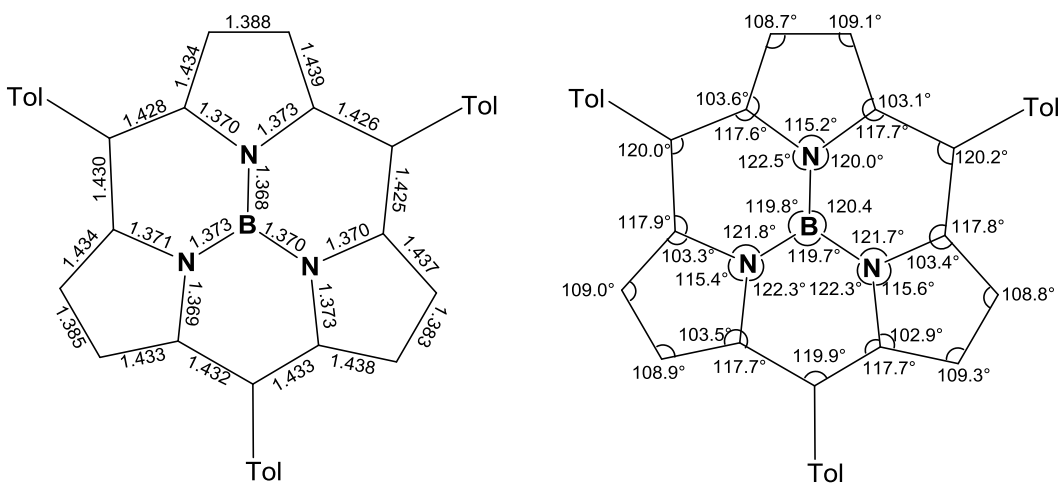

**Fig. S47** Selected bond lengths and bond angles of  $2a-BAr^F$ . Bond lengths and bond angles are measured based on single crystal data.

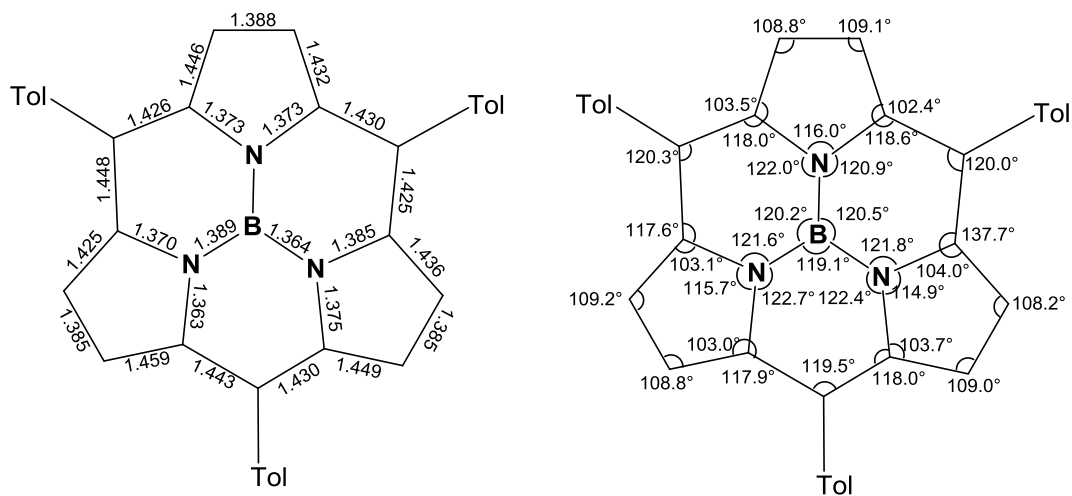

**Fig. S48** Selected bond lengths and bond angles of  $2a-SbF_6$ . Bond lengths and bond angles are measured based on single crystal data.

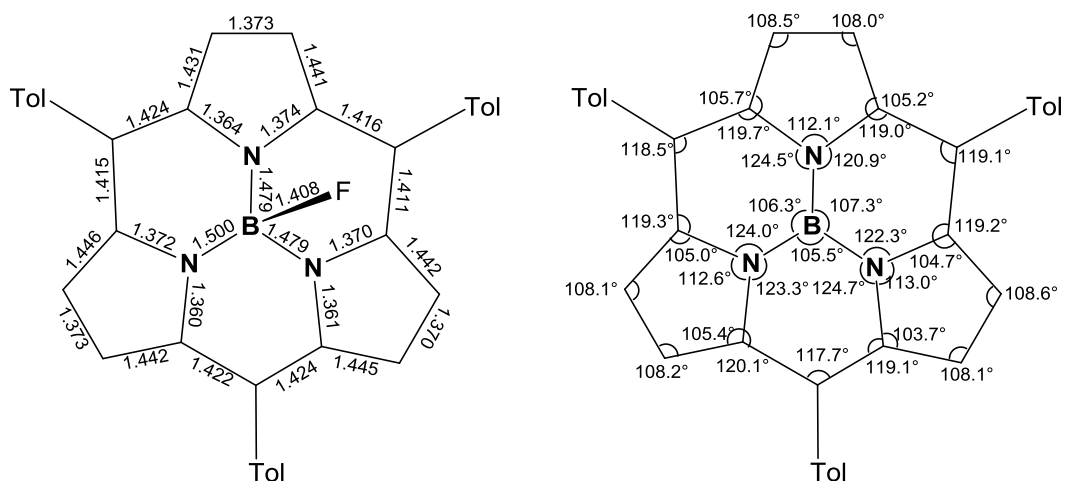

**Fig. S49** Selected bond lengths and bond angles of **3a**. Bond lengths and bond angles are measured based on single crystal data.

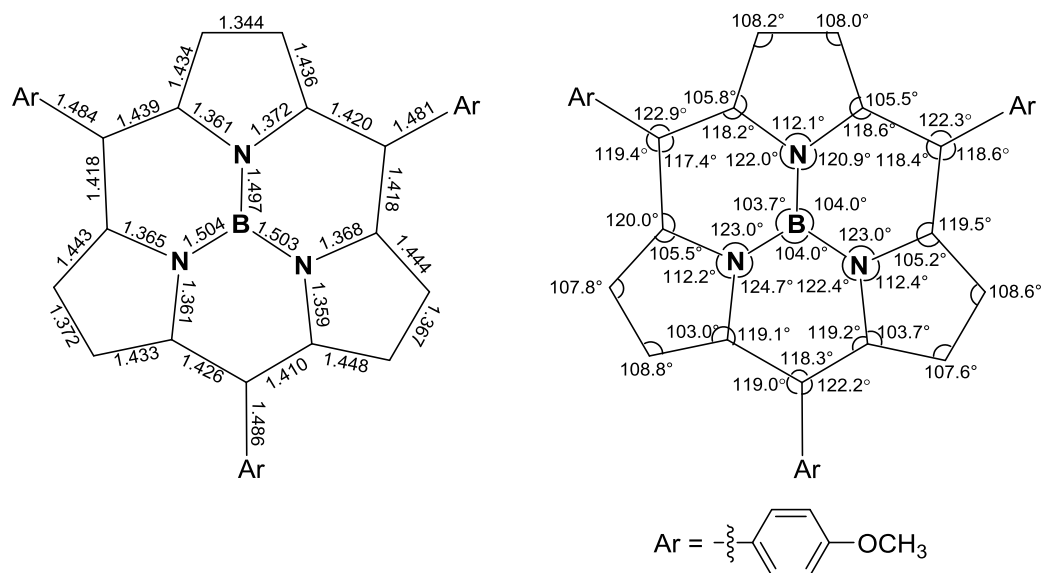

**Fig. S50** Selected bond lengths and bond angles of **1b**. Bond lengths and bond angles are measured based on single crystal data.

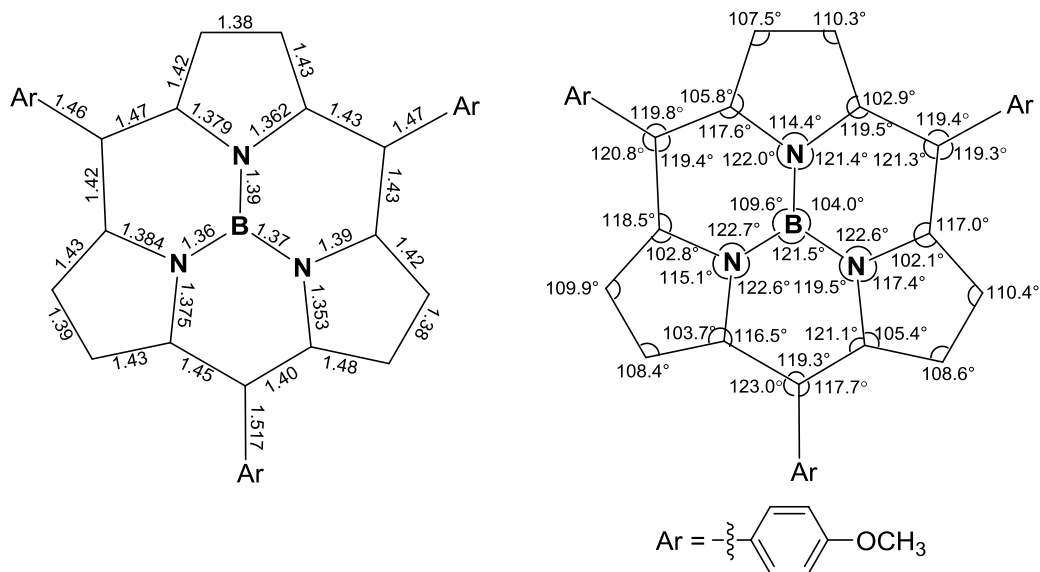

**Fig. S51** Selected bond lengths and bond angles of **2b-SbF<sub>6</sub>**. Bond lengths and bond angles are measured based on single crystal data.

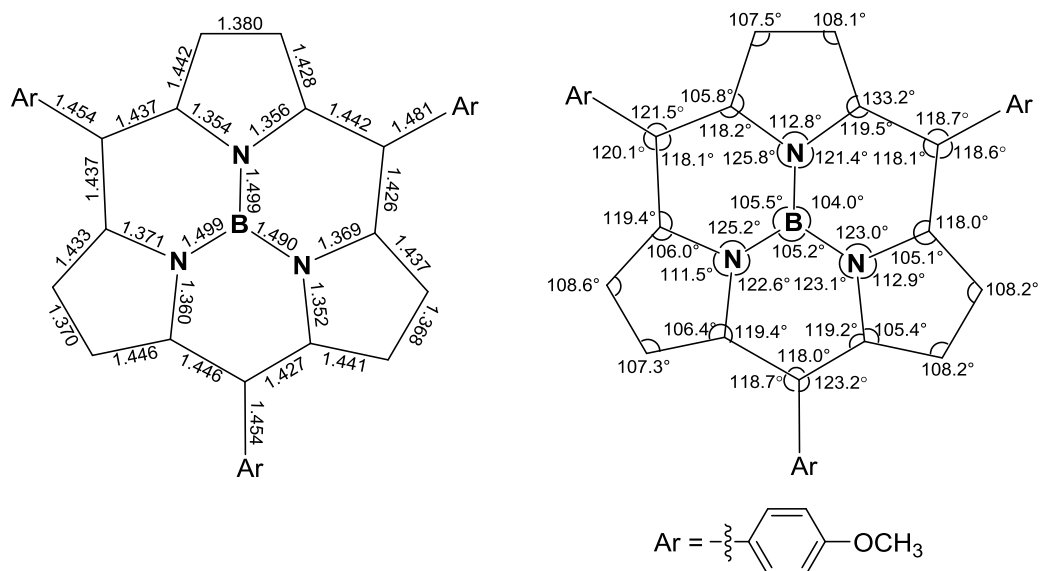

**Fig. S52** Selected bond lengths and bond angles of **4b**. Bond lengths and bond angles are measured based on single crystal data.

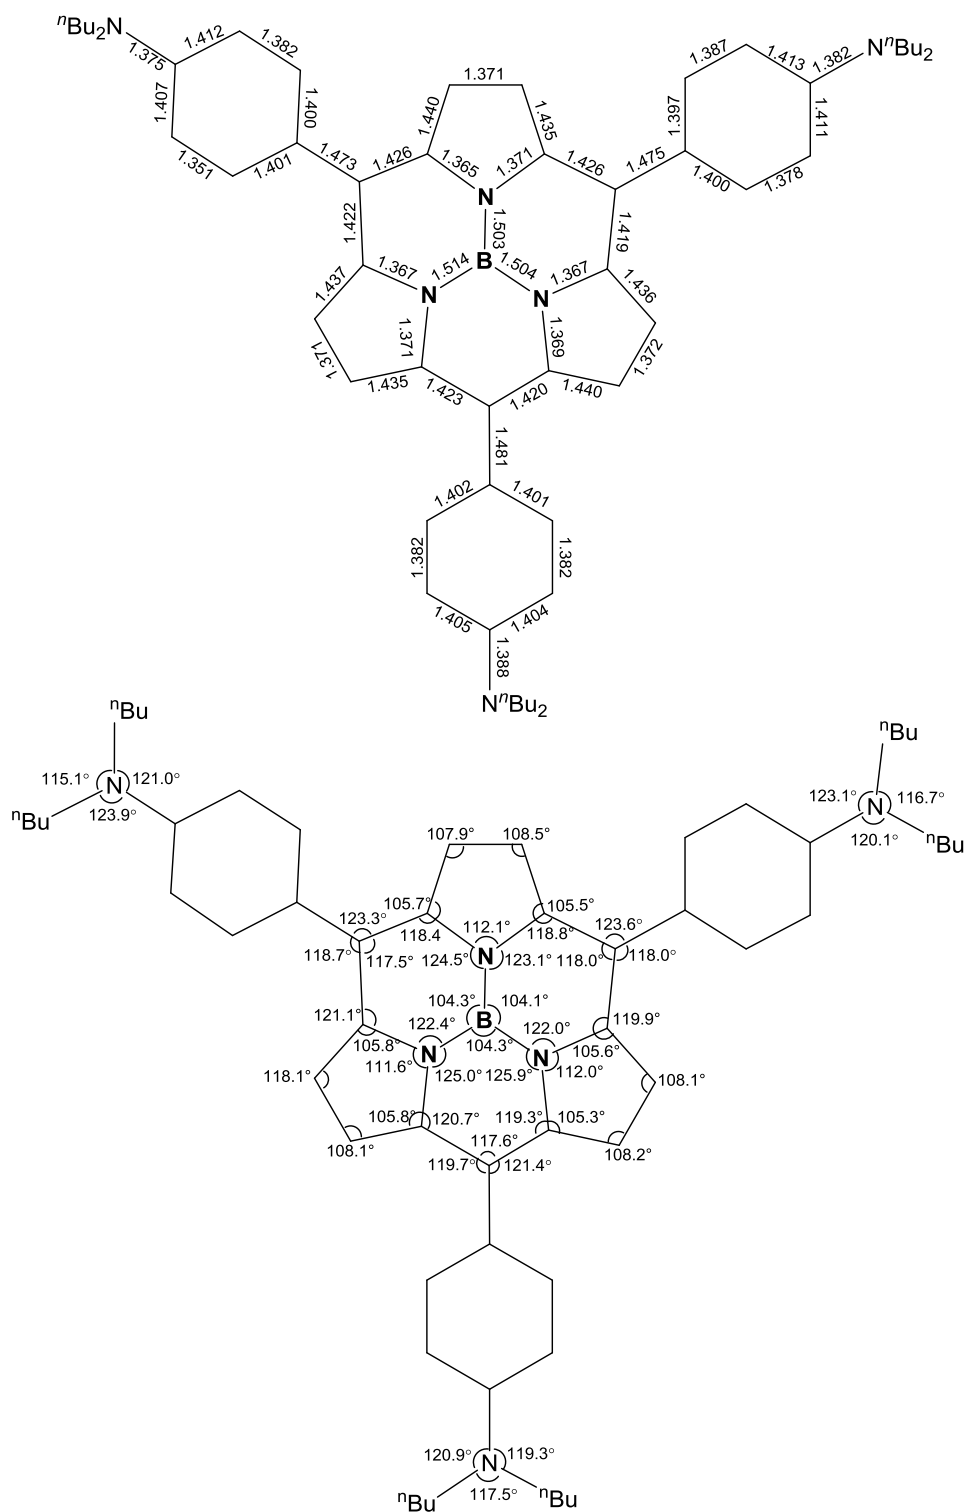

**Fig. S53** Selected bond lengths and bond angles of **1c**. Bond lengths and bond angles are measured based on single crystal data.

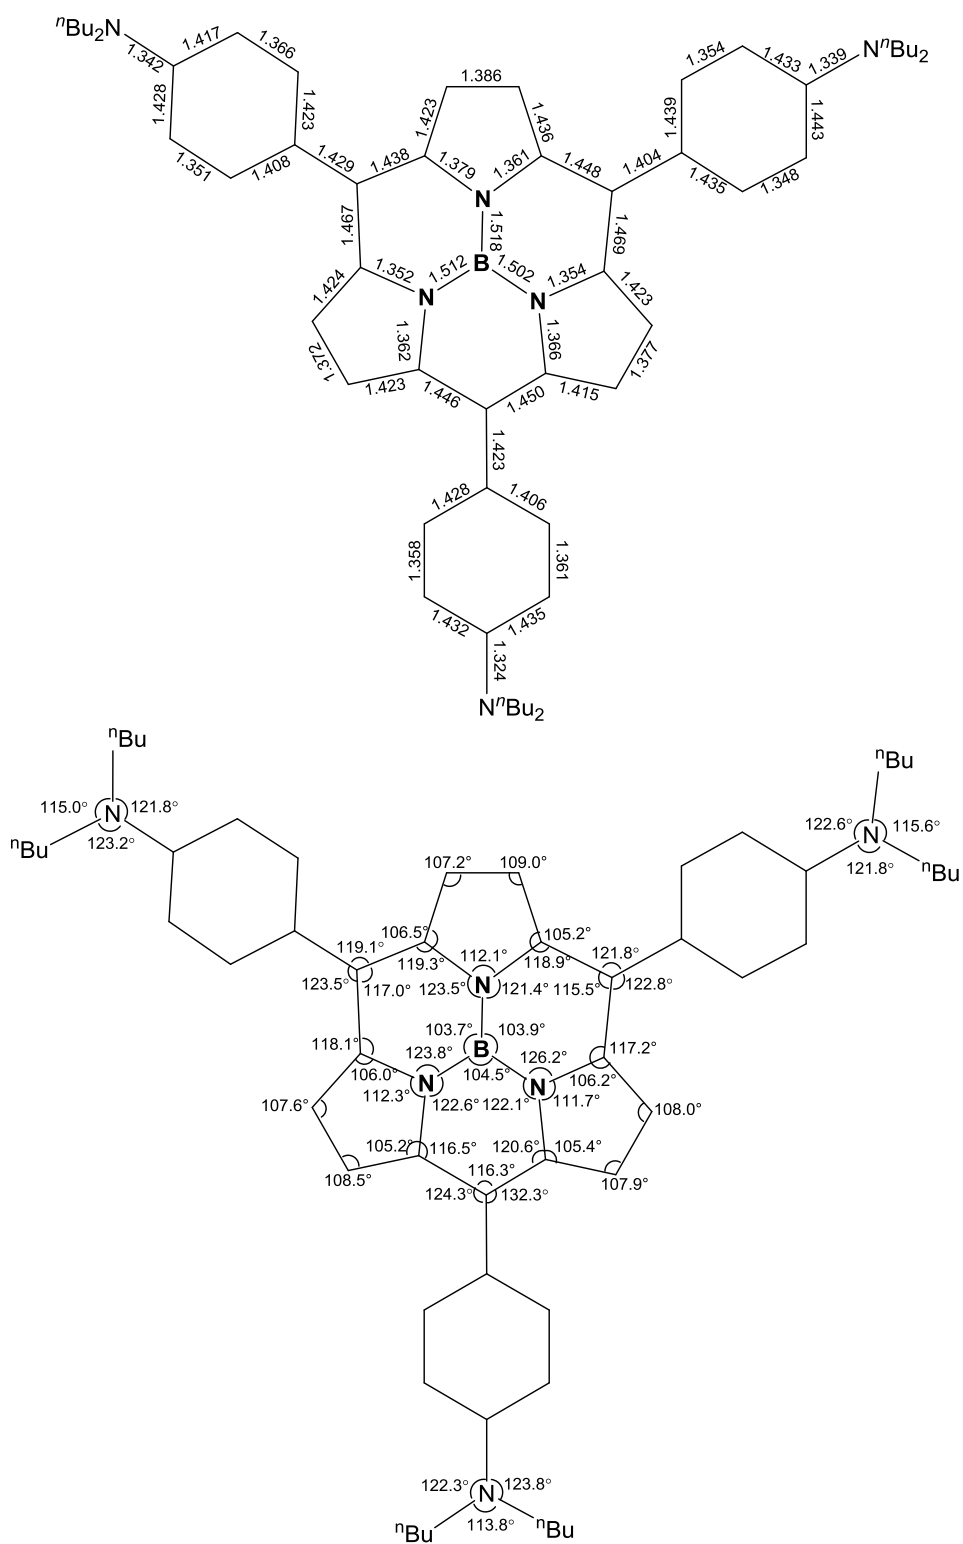

**Fig. S54** Selected bond lengths and bond angles of 7c. Bond lengths and bond angles are measured based on single crystal data.

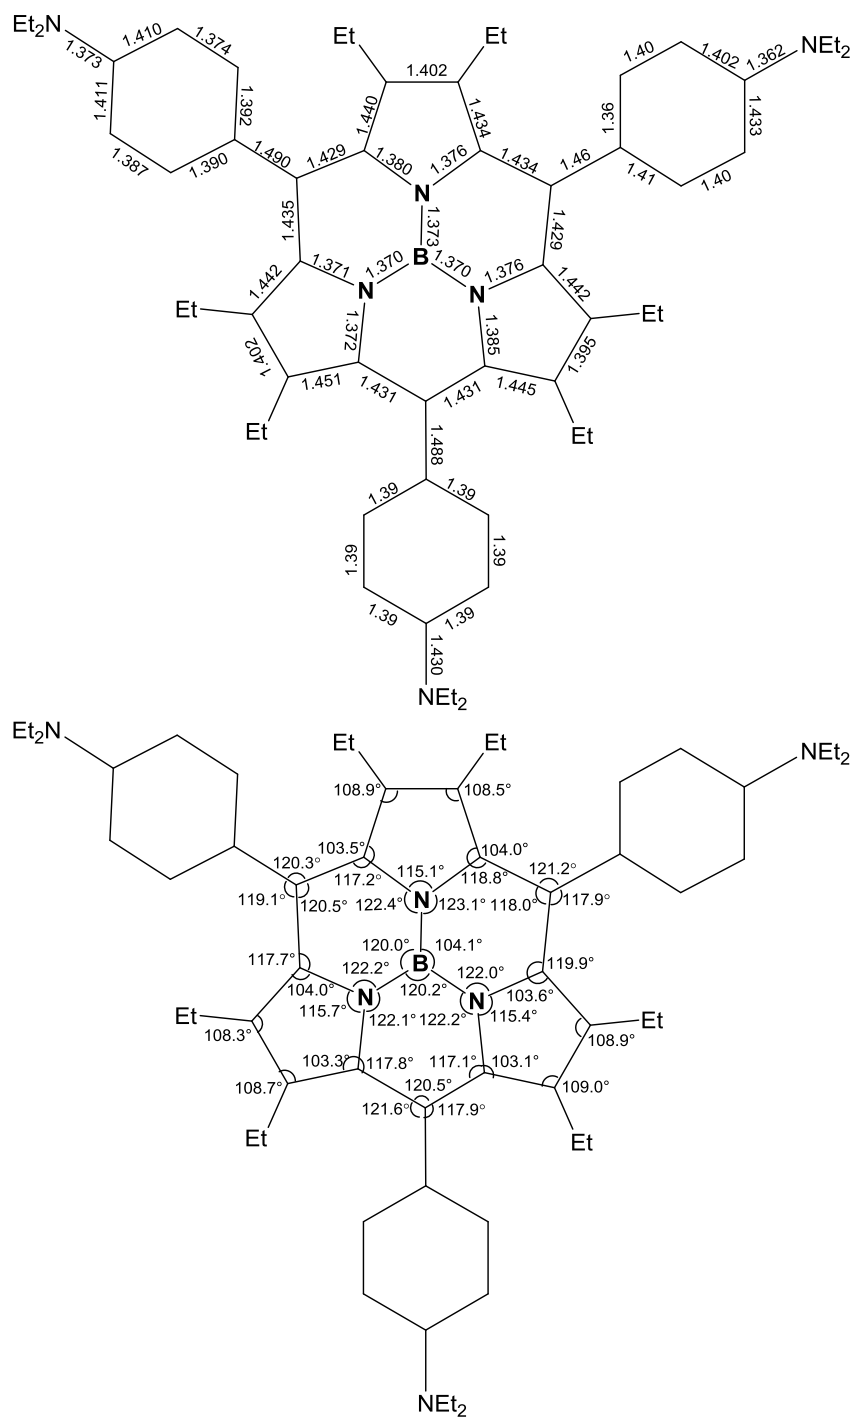

**Fig. S55** Selected bond lengths and bond angles of **2d-SbF<sub>6</sub>**. Bond lengths and bond angles are measured based on single crystal data.



**Table S6** Crystal data and refinement results for compound **2a-SbCl<sub>6</sub>**.

|                                   |                                                                     |                  |
|-----------------------------------|---------------------------------------------------------------------|------------------|
| Identification code               | <b>2a-SbCl<sub>6</sub></b>                                          |                  |
| Empirical formula                 | C <sub>36</sub> H <sub>27</sub> B Cl <sub>6</sub> N <sub>3</sub> Sb |                  |
| Formula weight                    | 846.86                                                              |                  |
| Temperature                       | 100.01(10) K                                                        |                  |
| Wavelength                        | 1.54184 Å                                                           |                  |
| Crystal system                    | Monoclinic                                                          |                  |
| Space group                       | P 1 21/n 1                                                          |                  |
| Unit cell dimensions              | a = 12.2079(3) Å                                                    | α = 90 °         |
|                                   | b = 33.4621(9) Å                                                    | β = 100.125(2) ° |
|                                   | c = 17.1132(4) Å                                                    | γ = 90 °         |
| Volume                            | 6881.9(3) Å <sup>3</sup>                                            |                  |
| Z                                 | 8                                                                   |                  |
| Density (calculated)              | 1.635 Mg/m <sup>3</sup>                                             |                  |
| Absorption coefficient            | 10.899 mm <sup>-1</sup>                                             |                  |
| F(000)                            | 3376                                                                |                  |
| Crystal size                      | 0.25 x 0.1 x 0.02 mm <sup>3</sup>                                   |                  |
| Theta range for data collection   | 2.641 to 66.600 °                                                   |                  |
| Index ranges                      | -14<=h<=13, -39<=k<=38, -13<=l<=20                                  |                  |
| Reflections collected             | 25814                                                               |                  |
| Independent reflections           | 12121 [R(int) = 0.0626]                                             |                  |
| Completeness to theta = 66.600 °  | 99.6 %                                                              |                  |
| Absorption correction             | Semi-empirical from equivalents                                     |                  |
| Max. and min. transmission        | 1.00000 and 0.30136                                                 |                  |
| Refinement method                 | Full-matrix least-squares on F <sup>2</sup>                         |                  |
| Data / restraints / parameters    | 12121 / 0 / 856                                                     |                  |
| Goodness-of-fit on F <sup>2</sup> | 1.002                                                               |                  |
| Final R indices [I>2sigma(I)]     | R1 = 0.0564, wR2 = 0.1421                                           |                  |
| R indices (all data)              | R1 = 0.0781, wR2 = 0.1675                                           |                  |
| Largest diff. peak and hole       | 1.632 and -1.217 e.Å <sup>-3</sup>                                  |                  |
| CCDC number                       | 2381939                                                             |                  |

**Table S7** Crystal data and refinement results for compound **2a-BAr<sup>F</sup>**.

|                                   |                                                                               |                 |
|-----------------------------------|-------------------------------------------------------------------------------|-----------------|
| Identification code               | <b>2a-BAr<sup>F</sup></b>                                                     |                 |
| Empirical formula                 | C <sub>74</sub> H <sub>43</sub> B <sub>2</sub> F <sub>20</sub> N <sub>3</sub> |                 |
| Formula weight                    | 1375.73                                                                       |                 |
| Temperature                       | 101(2) K                                                                      |                 |
| Wavelength                        | 1.54184 Å                                                                     |                 |
| Crystal system                    | Monoclinic                                                                    |                 |
| Space group                       | P 1 21/c 1                                                                    |                 |
| Unit cell dimensions              | a = 15.2317(3) Å                                                              | α = 90 °        |
|                                   | b = 12.8913(2) Å                                                              | β = 90.302(2) ° |
|                                   | c = 31.0070(8) Å                                                              | γ = 90 °        |
| Volume                            | 6088.3(2) Å <sup>3</sup>                                                      |                 |
| Z                                 | 4                                                                             |                 |
| Density (calculated)              | 1.501 Mg/m <sup>3</sup>                                                       |                 |
| Absorption coefficient            | 1.133 mm <sup>-1</sup>                                                        |                 |
| F(000)                            | 2792                                                                          |                 |
| Crystal size                      | 0.3 x 0.15 x 0.02 mm <sup>3</sup>                                             |                 |
| Theta range for data collection   | 3.713 to 66.600 °                                                             |                 |
| Index ranges                      | -9<=h<=18, -15<=k<=15, -36<=l<=36                                             |                 |
| Reflections collected             | 23268                                                                         |                 |
| Independent reflections           | 10735 [R(int) = 0.0384]                                                       |                 |
| Completeness to theta = 66.600 °  | 99.9 %                                                                        |                 |
| Absorption correction             | Semi-empirical from equivalents                                               |                 |
| Max. and min. transmission        | 1.00000 and 0.72332                                                           |                 |
| Refinement method                 | Full-matrix least-squares on F <sup>2</sup>                                   |                 |
| Data / restraints / parameters    | 10735 / 0 / 897                                                               |                 |
| Goodness-of-fit on F <sup>2</sup> | 1.008                                                                         |                 |
| Final R indices [I>2sigma(I)]     | R1 = 0.0477, wR2 = 0.1094                                                     |                 |
| R indices (all data)              | R1 = 0.0665, wR2 = 0.1202                                                     |                 |
| Largest diff. peak and hole       | 0.228 and -0.276 e.Å <sup>-3</sup>                                            |                 |
| CCDC number                       | 2381940                                                                       |                 |

**Table S8** Crystal data and refinement results for compound **2a-SbF<sub>6</sub>**.

|                                   |                                                                                                         |                   |
|-----------------------------------|---------------------------------------------------------------------------------------------------------|-------------------|
| Identification code               | <b>2a-SbF<sub>6</sub></b>                                                                               |                   |
| Empirical formula                 | <b>C<sub>75</sub>H<sub>60</sub>B<sub>2</sub>Cl<sub>6</sub>F<sub>12</sub>N<sub>6</sub>Sb<sub>2</sub></b> |                   |
| Formula weight                    | 1751.11                                                                                                 |                   |
| Temperature                       | 100.01(10) K                                                                                            |                   |
| Wavelength                        | 1.54184 Å                                                                                               |                   |
| Crystal system                    | Monoclinic                                                                                              |                   |
| Space group                       | P 1 21/n 1                                                                                              |                   |
| Unit cell dimensions              | a = 7.79716(14) Å                                                                                       | α = 90 °          |
|                                   | b = 24.2551(4) Å                                                                                        | β = 94.9370(17) ° |
|                                   | c = 36.7052(6) Å                                                                                        | γ = 90 °          |
| Volume                            | 6916.0(2) Å <sup>3</sup>                                                                                |                   |
| Z                                 | 4                                                                                                       |                   |
| Density (calculated)              | 1.682 Mg/m <sup>3</sup>                                                                                 |                   |
| Absorption coefficient            | 9.041 mm <sup>-1</sup>                                                                                  |                   |
| F(000)                            | 3496                                                                                                    |                   |
| Crystal size                      | 0.3 x 0.12 x 0.03 mm <sup>3</sup>                                                                       |                   |
| Theta range for data collection   | 2.186 to 66.600 °                                                                                       |                   |
| Index ranges                      | -8<=h<=9, -28<=k<=17, -43<=l<=38                                                                        |                   |
| Reflections collected             | 29830                                                                                                   |                   |
| Independent reflections           | 12218 [R(int) = 0.0546]                                                                                 |                   |
| Completeness to theta = 66.600 °  | 100.0 %                                                                                                 |                   |
| Absorption correction             | Semi-empirical from equivalents                                                                         |                   |
| Max. and min. transmission        | 1.00000 and 0.43791                                                                                     |                   |
| Refinement method                 | Full-matrix least-squares on F <sup>2</sup>                                                             |                   |
| Data / restraints / parameters    | 12218 / 0 / 954                                                                                         |                   |
| Goodness-of-fit on F <sup>2</sup> | 1.070                                                                                                   |                   |
| Final R indices [I>2sigma(I)]     | R1 = 0.0484, wR2 = 0.1109                                                                               |                   |
| R indices (all data)              | R1 = 0.0578, wR2 = 0.1170                                                                               |                   |
| Largest diff. peak and hole       | 0.980 and -0.928 e.Å <sup>-3</sup>                                                                      |                   |
| CCDC number                       | 2381941                                                                                                 |                   |

**Table S9** Crystal data and refinement results for compound **3a**.

|                                   |                                                    |                  |
|-----------------------------------|----------------------------------------------------|------------------|
| Identification code               | <b>3a</b>                                          |                  |
| Empirical formula                 | C <sub>42</sub> H <sub>33</sub> B F N <sub>3</sub> |                  |
| Formula weight                    | 609.52                                             |                  |
| Temperature                       | 100.00(10) K                                       |                  |
| Wavelength                        | 1.54184 Å                                          |                  |
| Crystal system                    | Monoclinic                                         |                  |
| Space group                       | P 1 21/c 1                                         |                  |
| Unit cell dimensions              | a = 20.2522(6) Å                                   | α = 90 °         |
|                                   | b = 13.9389(4) Å                                   | β = 104.932(4) ° |
|                                   | c = 23.0024(9) Å                                   | γ = 90 °         |
| Volume                            | 6274.2(4) Å <sup>3</sup>                           |                  |
| Z                                 | 8                                                  |                  |
| Density (calculated)              | 1.291 Mg/m <sup>3</sup>                            |                  |
| Absorption coefficient            | 0.619 mm <sup>-1</sup>                             |                  |
| F(000)                            | 2560                                               |                  |
| Crystal size                      | 0.2 x 0.14 x 0.1 mm <sup>3</sup>                   |                  |
| Theta range for data collection   | 3.743 to 66.587 °                                  |                  |
| Index ranges                      | -24 ≤ h ≤ 24, -15 ≤ k ≤ 16, -27 ≤ l ≤ 27           |                  |
| Reflections collected             | 40930                                              |                  |
| Independent reflections           | 11069 [R(int) = 0.0615]                            |                  |
| Completeness to theta = 66.587 °  | 100.0 %                                            |                  |
| Absorption correction             | Semi-empirical from equivalents                    |                  |
| Max. and min. transmission        | 1.00000 and 0.50278                                |                  |
| Refinement method                 | Full-matrix least-squares on F <sup>2</sup>        |                  |
| Data / restraints / parameters    | 11069 / 0 / 853                                    |                  |
| Goodness-of-fit on F <sup>2</sup> | 1.037                                              |                  |
| Final R indices [I > 2σ(I)]       | R1 = 0.0652, wR2 = 0.1622                          |                  |
| R indices (all data)              | R1 = 0.0866, wR2 = 0.1762                          |                  |
| Largest diff. peak and hole       | 0.273 and -0.268 e.Å <sup>-3</sup>                 |                  |
| CCDC number                       | 2381942                                            |                  |

**Table S10** Crystal data and refinement results for compound **1b**.

|                                        |                                                                  |                            |
|----------------------------------------|------------------------------------------------------------------|----------------------------|
| Identification code                    | <b>1b</b>                                                        |                            |
| Empirical formula                      | $C_{43}H_{34}BN_3O_3$                                            |                            |
| Formula weight                         | 651.54                                                           |                            |
| Temperature                            | 99.98(18) K                                                      |                            |
| Wavelength                             | 1.54184 Å                                                        |                            |
| Crystal system                         | Triclinic                                                        |                            |
| Space group                            | P-1                                                              |                            |
| Unit cell dimensions                   | $a = 7.9203(3)$ Å                                                | $\alpha = 77.130(4)^\circ$ |
|                                        | $b = 11.6190(6)$ Å                                               | $\beta = 87.008(3)^\circ$  |
|                                        | $c = 18.9943(8)$ Å                                               | $\gamma = 71.179(4)^\circ$ |
| Volume                                 | $1612.58(13)$ Å <sup>3</sup>                                     |                            |
| Z                                      | 2                                                                |                            |
| Density (calculated)                   | $1.342$ Mg/m <sup>3</sup>                                        |                            |
| Absorption coefficient                 | $0.665$ mm <sup>-1</sup>                                         |                            |
| F(000)                                 | 684                                                              |                            |
| Crystal size                           | $0.2 \times 0.04 \times 0.02$ mm <sup>3</sup>                    |                            |
| Theta range for data collection        | $2.387$ to $66.595^\circ$                                        |                            |
| Index ranges                           | $-9 \leq h \leq 7$ , $-12 \leq k \leq 13$ , $-20 \leq l \leq 22$ |                            |
| Reflections collected                  | 9587                                                             |                            |
| Independent reflections                | 5668 [R(int) = 0.0947]                                           |                            |
| Completeness to theta = $66.595^\circ$ | 99.6 %                                                           |                            |
| Absorption correction                  | Semi-empirical from equivalents                                  |                            |
| Max. and min. transmission             | 1.00000 and 0.19508                                              |                            |
| Refinement method                      | Full-matrix least-squares on F <sup>2</sup>                      |                            |
| Data / restraints / parameters         | 5668 / 0 / 455                                                   |                            |
| Goodness-of-fit on F <sup>2</sup>      | 1.066                                                            |                            |
| Final R indices [I > 2sigma(I)]        | R1 = 0.0696, wR2 = 0.1808                                        |                            |
| R indices (all data)                   | R1 = 0.1037, wR2 = 0.2039                                        |                            |
| Largest diff. peak and hole            | $0.331$ and $-0.391$ e.Å <sup>-3</sup>                           |                            |
| CCDC number                            | 2381943                                                          |                            |

**Table S11** Crystal data and refinement results for compound **4b**.

|                                   |                                             |                             |
|-----------------------------------|---------------------------------------------|-----------------------------|
| Identification code               | <b>4b</b>                                   |                             |
| Empirical formula                 | $C_{87}H_{70}B_2Cl_2F_{12}N_6O_6Sb_2$       |                             |
| Formula weight                    | 1859.51                                     |                             |
| Temperature                       | 100.00(10) K                                |                             |
| Wavelength                        | 1.54184 Å                                   |                             |
| Crystal system                    | Monoclinic                                  |                             |
| Space group                       | P 1 2/n 1                                   |                             |
| Unit cell dimensions              | a = 12.5687(2) Å                            | $\alpha = 90^\circ$         |
|                                   | b = 18.9045(4) Å                            | $\beta = 98.6600(10)^\circ$ |
|                                   | c = 18.1252(2) Å                            | $\gamma = 90^\circ$         |
| Volume                            | 4257.54(12) Å <sup>3</sup>                  |                             |
| Z                                 | 2                                           |                             |
| Density (calculated)              | 1.451 Mg/m <sup>3</sup>                     |                             |
| Absorption coefficient            | 6.307 mm <sup>-1</sup>                      |                             |
| F(000)                            | 1872                                        |                             |
| Crystal size                      | 0.3 x 0.2 x 0.2 mm <sup>3</sup>             |                             |
| Theta range for data collection   | 2.337 to 66.595 °.                          |                             |
| Index ranges                      | -9<=h<=14, -22<=k<=19, -21<=l<=18           |                             |
| Reflections collected             | 15936                                       |                             |
| Independent reflections           | 7520 [R(int) = 0.0409]                      |                             |
| Completeness to theta = 66.595 °  | 99.9 %                                      |                             |
| Absorption correction             | Semi-empirical from equivalents             |                             |
| Max. and min. transmission        | 1.00000 and 0.36202                         |                             |
| Refinement method                 | Full-matrix least-squares on F <sup>2</sup> |                             |
| Data / restraints / parameters    | 7520 / 0 / 534                              |                             |
| Goodness-of-fit on F <sup>2</sup> | 1.039                                       |                             |
| Final R indices [I>2sigma(I)]     | R1 = 0.0630, wR2 = 0.1603                   |                             |
| R indices (all data)              | R1 = 0.0745, wR2 = 0.1695                   |                             |
| Largest diff. peak and hole       | 3.914 and -1.365 e.Å <sup>-3</sup>          |                             |
| CCDC number                       | 2381944                                     |                             |

**Table S12** Crystal data and refinement results for compound **2b-SbF<sub>6</sub>**.

|                                   |                                                                                  |          |
|-----------------------------------|----------------------------------------------------------------------------------|----------|
| Identification code               | <b>2b-SbF<sub>6</sub></b>                                                        |          |
| Empirical formula                 | C <sub>36</sub> H <sub>27</sub> BF <sub>6</sub> N <sub>3</sub> O <sub>3</sub> Sb |          |
| Formula weight                    | 796.16                                                                           |          |
| Temperature                       | 100.01(10) K                                                                     |          |
| Wavelength                        | 0.710 Å                                                                          |          |
| Crystal system                    | Orthorhombic                                                                     |          |
| Space group                       | Pna2 <sub>1</sub>                                                                |          |
| Unit cell dimensions              | a = 17.917 Å                                                                     | α = 90 ° |
|                                   | b = 21.981 Å                                                                     | β = 90 ° |
|                                   | c = 8.366 Å                                                                      | γ = 90 ° |
| Volume                            | 3294.9 Å <sup>3</sup>                                                            |          |
| Z                                 | 4                                                                                |          |
| Density (calculated)              | 1.605 Mg/m <sup>3</sup>                                                          |          |
| Absorption coefficient            | 0.899 mm <sup>-1</sup>                                                           |          |
| F(000)                            | 1592                                                                             |          |
| Crystal size                      | 0.3 x 0.07 x 0.06 mm <sup>3</sup>                                                |          |
| Theta range for data collection   | 1.465 to 25.000 °                                                                |          |
| Index ranges                      | -11 ≤ h ≤ 21, -26 ≤ k ≤ 26, -9 ≤ l ≤ 9                                           |          |
| Reflections collected             | 19951                                                                            |          |
| Independent reflections           | 5696 [R(int) = 0.0772]                                                           |          |
| Completeness to theta = 25.000 °  | 100.0 %                                                                          |          |
| Absorption correction             | Semi-empirical from equivalents                                                  |          |
| Max. and min. transmission        | 1.00000 and 0.40204                                                              |          |
| Refinement method                 | Full-matrix least-squares on F <sup>2</sup>                                      |          |
| Data / restraints / parameters    | 5696 / 202 / 545                                                                 |          |
| Goodness-of-fit on F <sup>2</sup> | 1.170                                                                            |          |
| Final R indices [I > 2σ(I)]       | R1 = 0.0835, wR2 = 0.1912                                                        |          |
| R indices (all data)              | R1 = 0.0850, wR2 = 0.1921                                                        |          |
| Largest diff. peak and hole       | 1.532 and -1.916 e.Å <sup>-3</sup>                                               |          |
| CCDC                              | 2382017                                                                          |          |

**Table S13** Crystal data and refinement results for compound **1c**

|                                   |                                                  |                  |
|-----------------------------------|--------------------------------------------------|------------------|
| Identification code               | <b>1c</b>                                        |                  |
| Empirical formula                 | C <sub>64</sub> H <sub>79</sub> B N <sub>6</sub> |                  |
| Formula weight                    | 943.14                                           |                  |
| Temperature                       | 99.97(18) K                                      |                  |
| Wavelength                        | 1.54184 Å                                        |                  |
| Crystal system                    | Triclinic                                        |                  |
| Space group                       | P-1                                              |                  |
| Unit cell dimensions              | a = 13.4008(3) Å                                 | α = 112.584(2) ° |
|                                   | b = 15.0857(4) Å                                 | β = 96.219(2) °  |
|                                   | c = 16.5388(3) Å                                 | γ = 110.308(2) ° |
| Volume                            | 2780.22(12) Å <sup>3</sup>                       |                  |
| Z                                 | 2                                                |                  |
| Density (calculated)              | 1.127 Mg/m <sup>3</sup>                          |                  |
| Absorption coefficient            | 0.495 mm <sup>-1</sup>                           |                  |
| F(000)                            | 1020                                             |                  |
| Crystal size                      | 0.3 x 0.3 x 0.1 mm <sup>3</sup>                  |                  |
| Theta range for data collection   | 3.014 to 66.595 °                                |                  |
| Index ranges                      | -15 ≤ h ≤ 15, -17 ≤ k ≤ 16, -15 ≤ l ≤ 19         |                  |
| Reflections collected             | 18006                                            |                  |
| Independent reflections           | 9802 [R(int) = 0.0281]                           |                  |
| Completeness to theta = 66.595 °  | 99.9 %                                           |                  |
| Absorption correction             | Semi-empirical from equivalents                  |                  |
| Max. and min. transmission        | 1.00000 and 0.38896                              |                  |
| Refinement method                 | Full-matrix least-squares on F <sup>2</sup>      |                  |
| Data / restraints / parameters    | 9802 / 141 / 725                                 |                  |
| Goodness-of-fit on F <sup>2</sup> | 1.046                                            |                  |
| Final R indices [I > 2σ(I)]       | R1 = 0.0724, wR2 = 0.1973                        |                  |
| R indices (all data)              | R1 = 0.0784, wR2 = 0.2041                        |                  |
| Largest diff. peak and hole       | 0.981 and -0.525 e.Å <sup>-3</sup>               |                  |
| CCDC number                       | 2381946                                          |                  |



**Table S14** Crystal data and refinement results for compound **7c**.

|                                   |                                             |                            |
|-----------------------------------|---------------------------------------------|----------------------------|
| Identification code               | <b>7c</b>                                   |                            |
| Empirical formula                 | $C_{64}H_{77}BF_{12}N_6Sb_2$                |                            |
| Formula weight                    | 1412.62                                     |                            |
| Temperature                       | 100.01(10) K                                |                            |
| Wavelength                        | 1.54184 Å                                   |                            |
| Crystal system                    | Triclinic                                   |                            |
| Space group                       | P-1                                         |                            |
| Unit cell dimensions              | a = 14.1950(12) Å                           | $\alpha = 70.971(9)^\circ$ |
|                                   | b = 14.7581(16) Å                           | $\beta = 78.991(8)^\circ$  |
|                                   | c = 19.694(2) Å                             | $\gamma = 79.512(8)^\circ$ |
| Volume                            | 3796.4(7) Å <sup>3</sup>                    |                            |
| Z                                 | 2                                           |                            |
| Density (calculated)              | 1.236 Mg/m <sup>3</sup>                     |                            |
| Absorption coefficient            | 6.209 mm <sup>-1</sup>                      |                            |
| F(000)                            | 1436                                        |                            |
| Crystal size                      | 0.15 x 0.03 x 0 mm <sup>3</sup>             |                            |
| Theta range for data collection   | 2.397 to 66.601 °                           |                            |
| Index ranges                      | -16<=h<=16, -12<=k<=17, -20<=l<=23          |                            |
| Reflections collected             | 26991                                       |                            |
| Independent reflections           | 13402 [R(int) = 0.0861]                     |                            |
| Completeness to theta = 66.601 °  | 99.9 %                                      |                            |
| Absorption correction             | Semi-empirical from equivalents             |                            |
| Max. and min. transmission        | 1.00000 and 0.51554                         |                            |
| Refinement method                 | Full-matrix least-squares on F <sup>2</sup> |                            |
| Data / restraints / parameters    | 13402 / 206 / 883                           |                            |
| Goodness-of-fit on F <sup>2</sup> | 0.984                                       |                            |
| Final R indices [I>2sigma(I)]     | R1 = 0.0712, wR2 = 0.1731                   |                            |
| R indices (all data)              | R1 = 0.1144, wR2 = 0.2056                   |                            |
| Largest diff. peak and hole       | 1.195 and -0.684 e.Å <sup>-3</sup>          |                            |
| CCDC number                       | 2381948                                     |                            |

**Table S15** Crystal data and refinement results for compound **2d-SbF<sub>6</sub>**

|                                   |                                                                                                               |
|-----------------------------------|---------------------------------------------------------------------------------------------------------------|
| Identification code               | <b>2d-SbF<sub>6</sub></b>                                                                                     |
| Empirical formula                 | C <sub>58</sub> H <sub>74</sub> B Cl <sub>2</sub> F <sub>6</sub> N <sub>6</sub> Sb                            |
| Formula weight                    | 1172.69                                                                                                       |
| Temperature                       | 100.01(10) K                                                                                                  |
| Wavelength                        | 1.54184 Å                                                                                                     |
| Crystal system                    | Monoclinic                                                                                                    |
| Space group                       | P 1 21/c 1                                                                                                    |
| Unit cell dimensions              | a = 12.12180(10) Å      α = 90 °<br>b = 13.8905(2) Å      β = 97.8130(10) °<br>c = 32.6445(5) Å      γ = 90 ° |
| Volume                            | 5445.59(12) Å <sup>3</sup>                                                                                    |
| Z                                 | 4                                                                                                             |
| Density (calculated)              | 1.430 Mg/m <sup>3</sup>                                                                                       |
| Absorption coefficient            | 5.458 mm <sup>-1</sup>                                                                                        |
| F(000)                            | 2432                                                                                                          |
| Crystal size                      | 0.3 x 0.25 x 0.08 mm <sup>3</sup>                                                                             |
| Theta range for data collection   | 2.733 to 66.595 °                                                                                             |
| Index ranges                      | -9<=h<=14, -16<=k<=16, -38<=l<=38                                                                             |
| Reflections collected             | 32778                                                                                                         |
| Independent reflections           | 9614 [R(int) = 0.0394]                                                                                        |
| Completeness to theta = 66.595 °  | 100.0 %                                                                                                       |
| Absorption correction             | Semi-empirical from equivalents                                                                               |
| Max. and min. transmission        | 1.00000 and 0.18654                                                                                           |
| Refinement method                 | Full-matrix least-squares on F <sup>2</sup>                                                                   |
| Data / restraints / parameters    | 9614 / 465 / 896                                                                                              |
| Goodness-of-fit on F <sup>2</sup> | 1.064                                                                                                         |
| Final R indices [I>2sigma(I)]     | R1 = 0.0597, wR2 = 0.1563                                                                                     |
| R indices (all data)              | R1 = 0.0638, wR2 = 0.1597                                                                                     |
| Largest diff. peak and hole       | 0.876 and -1.097 e.Å <sup>-3</sup>                                                                            |
| CCDC number                       | 2381949                                                                                                       |

## 6. Copy of MALDI-TOF-MS

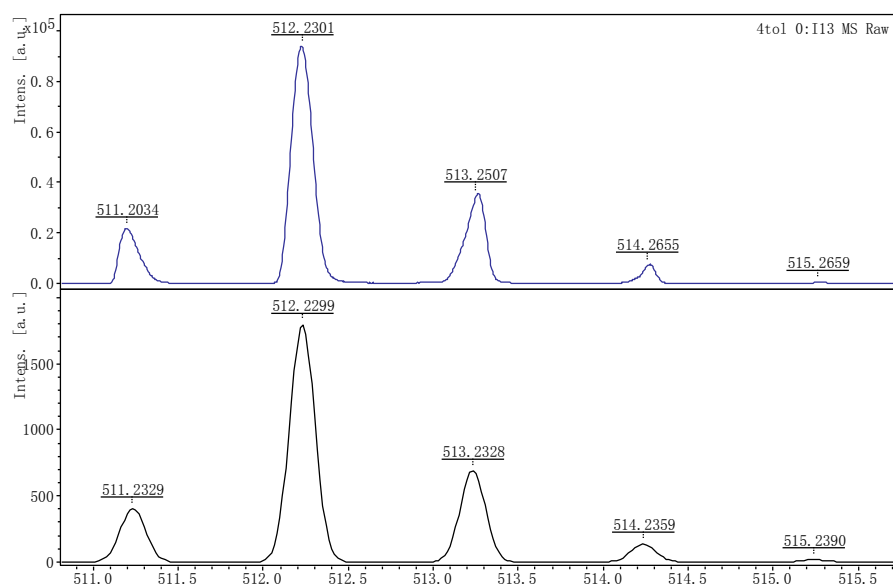

**Fig. S56** MALDI-TOF-MS spectrum of **1a**

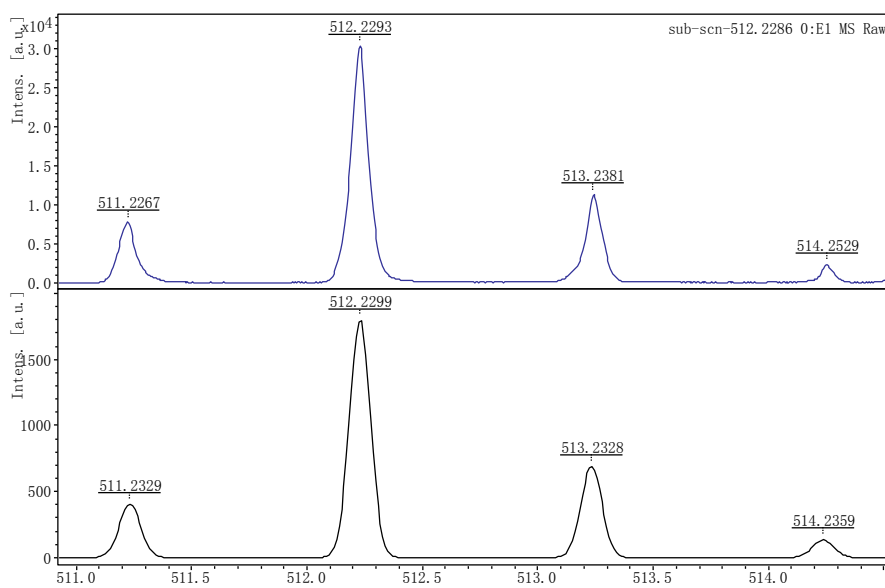

**Fig. S57** MALDI-TOF-MS spectrum of **2a-SbCl<sub>6</sub>**.

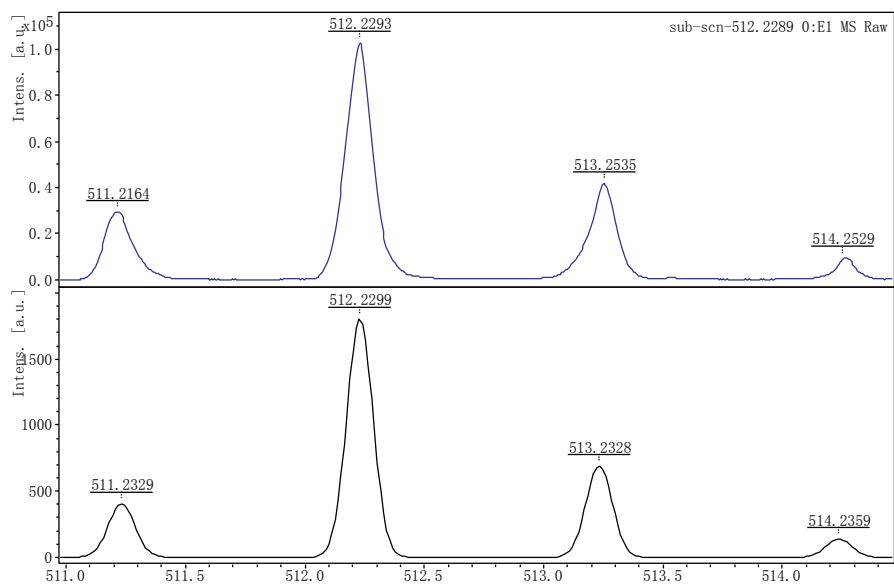

Fig. S58 MALDI-TOF-MS spectrum of **2a-BAr<sup>F</sup>**.

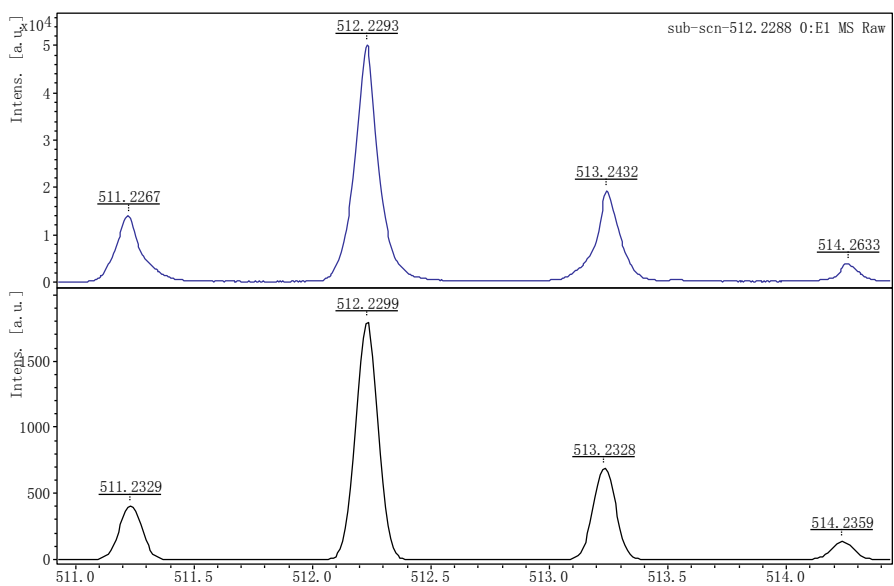

Fig. S59 MALDI-TOF-MS spectrum of **2a-SbF<sub>6</sub>**.

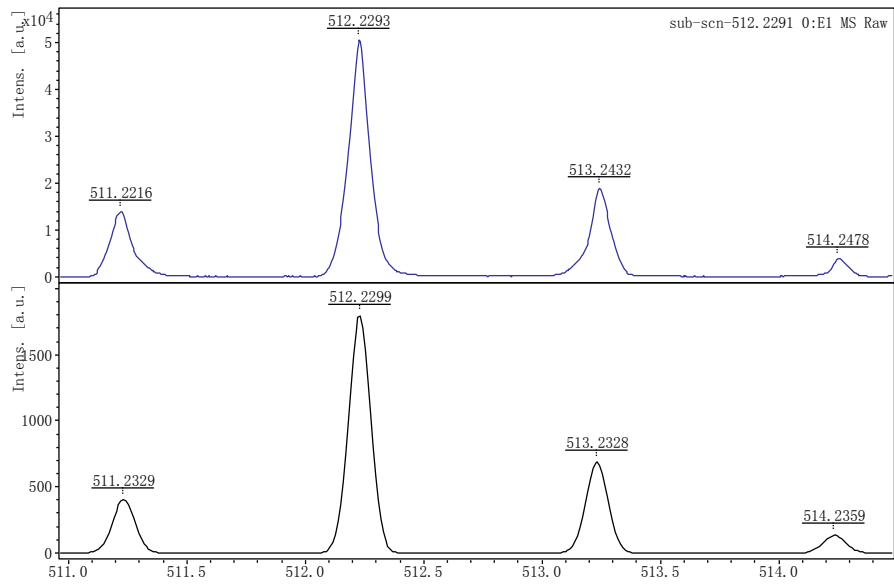

**Fig. S60** MALDI-TOF-MS spectrum of **3a**.

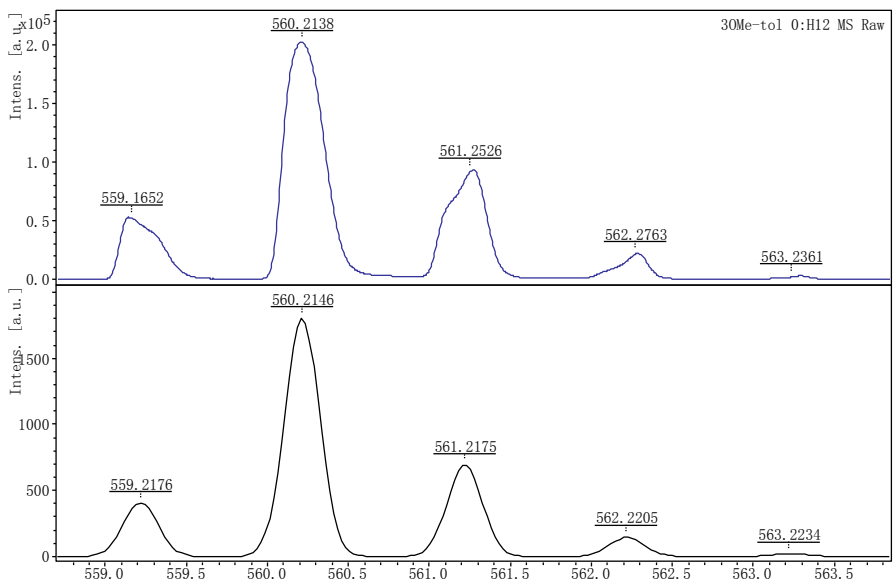

**Fig. S61** MALDI-TOF-MS spectrum of **1b**.

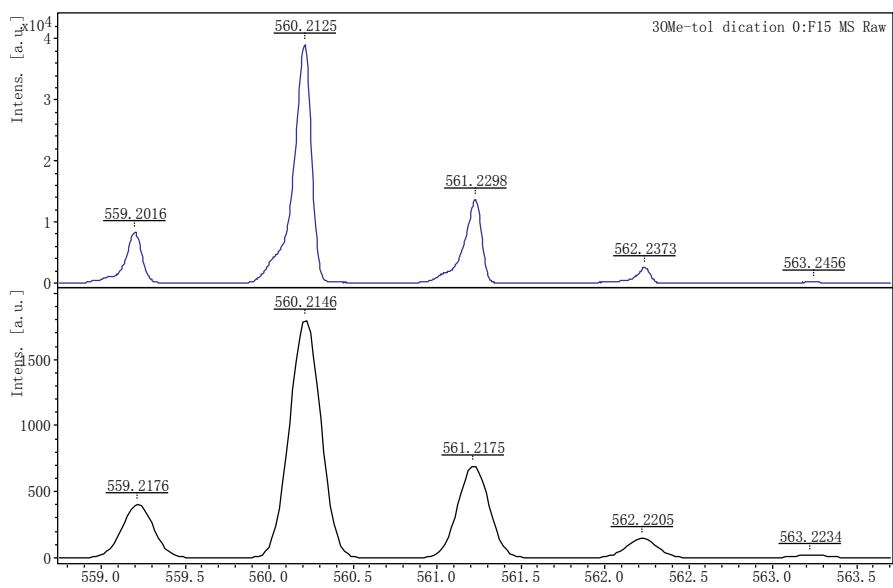

**Fig. S62** MALDI-TOF-MS spectrum of **4b**.

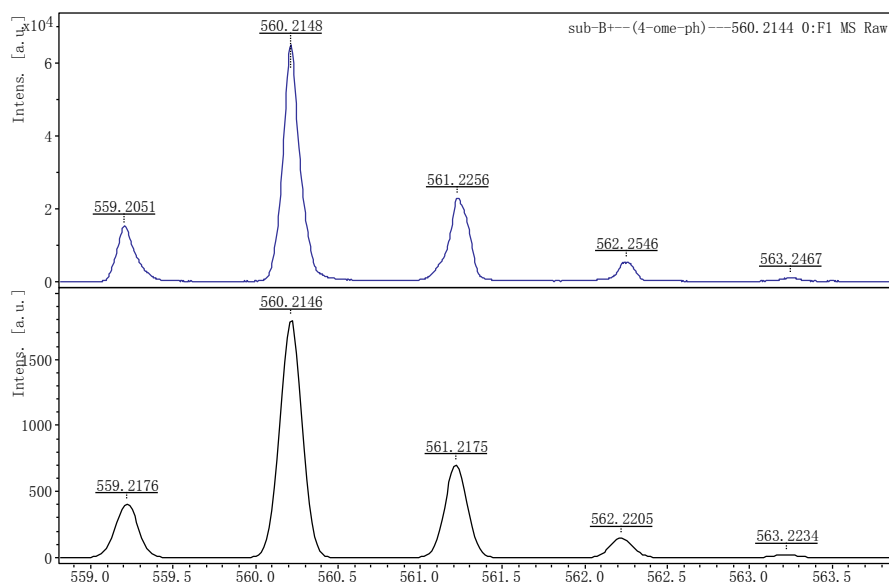

**Fig. S63** MALDI-TOF-MS spectrum of **2b-SbF<sub>6</sub>**.

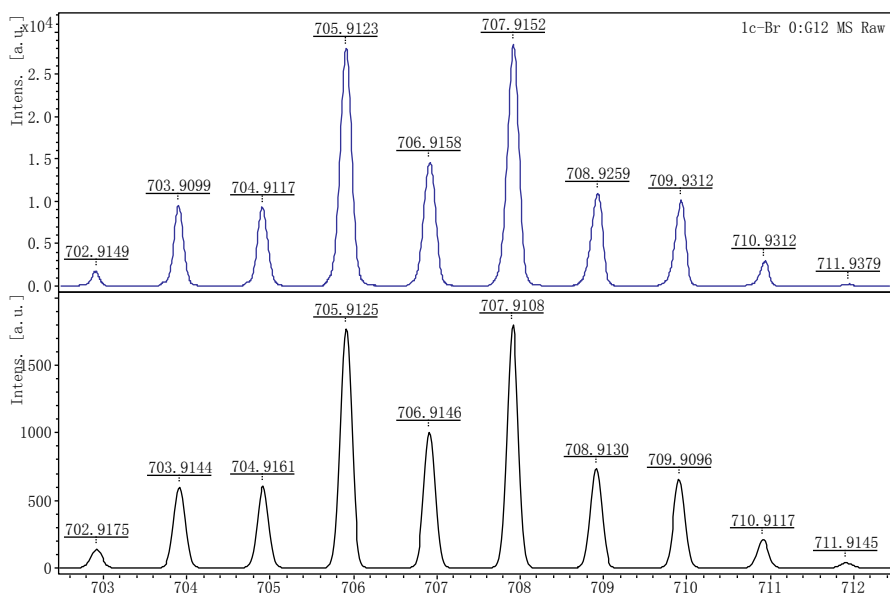

**Fig. S64** MALDI-TOF-MS spectrum of **1c-Br**.

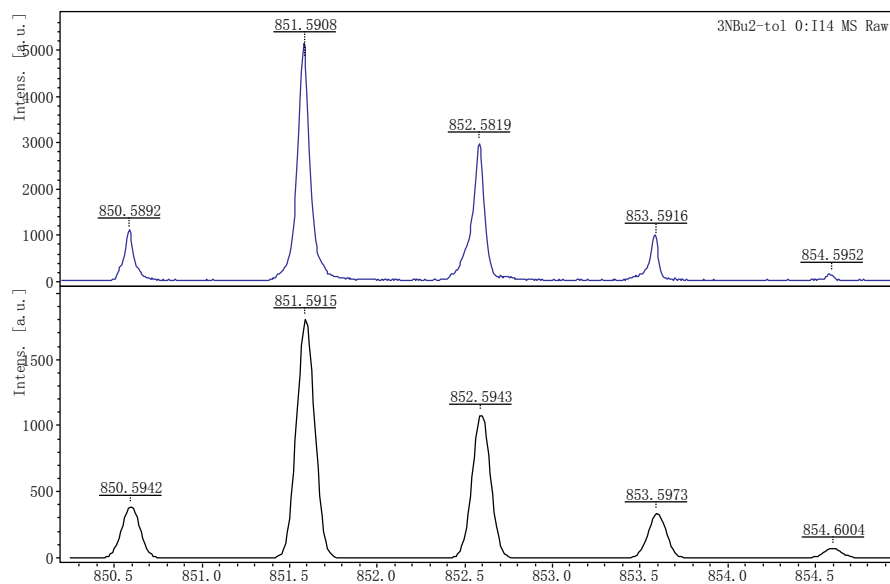

**Fig. S65** MALDI-TOF-MS spectrum of **1c**.

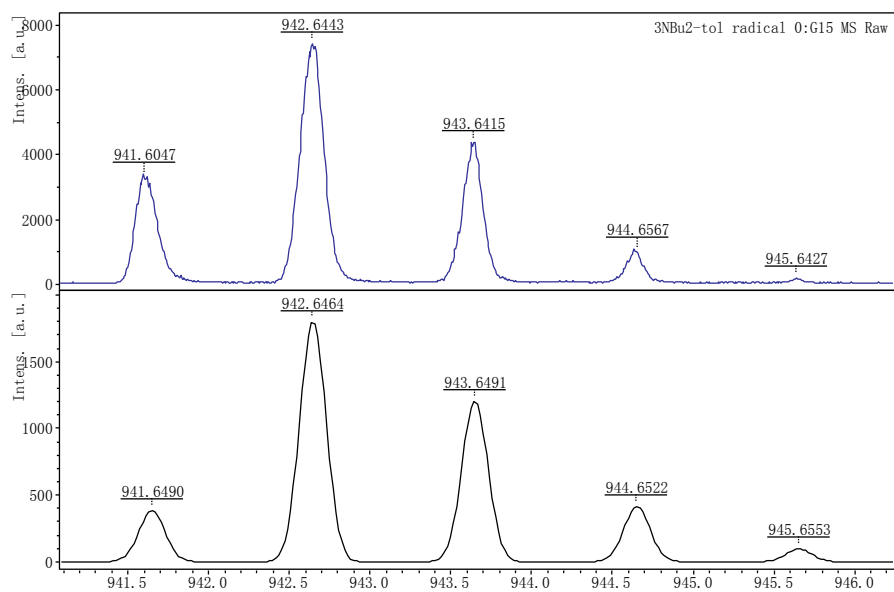

**Fig. S66** MALDI-TOF-MS spectrum of **4c**.

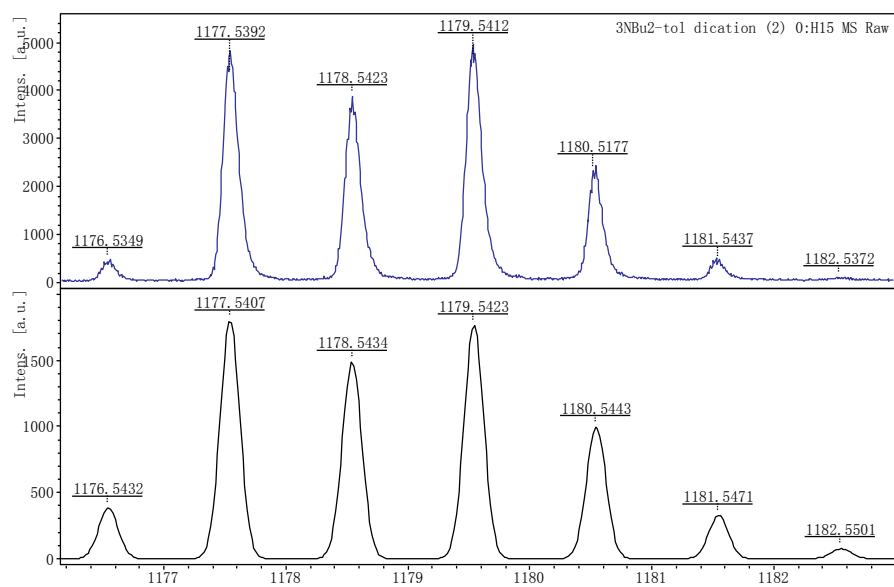

**Fig. S67** MALDI-TOF-MS spectrum of **7c**.



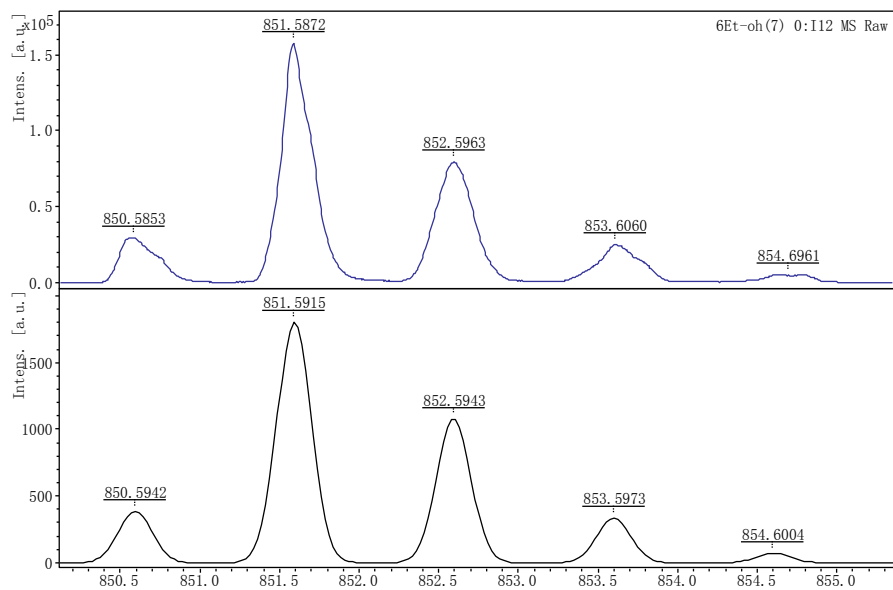

**Fig. S68** MALDI-TOF-MS spectrum of **1d-OH**.

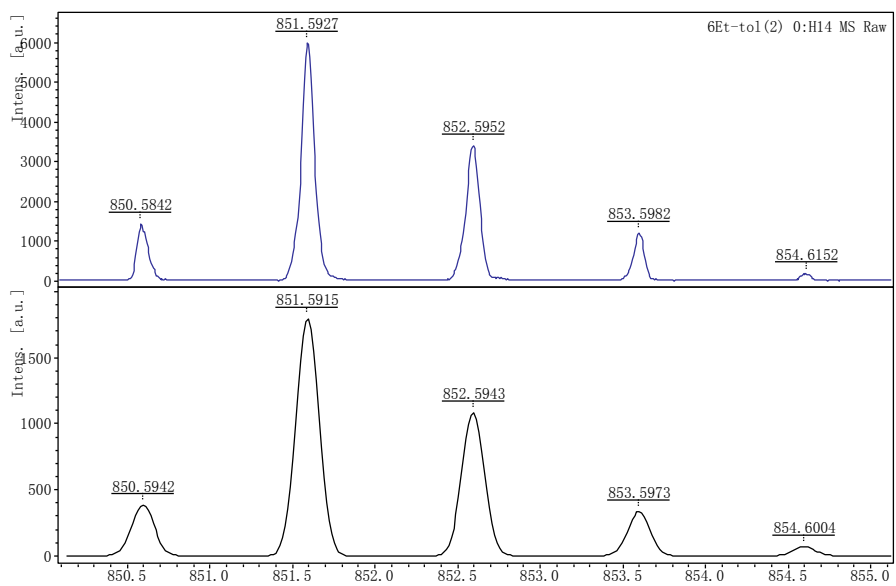

**Fig. S69** MALDI-TOF-MS spectrum of **1d**.

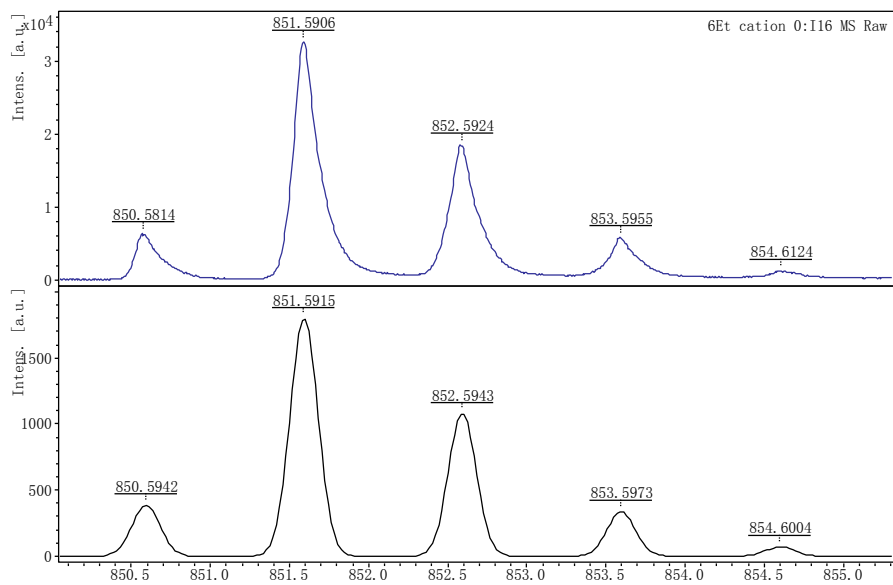

**Fig. S70** MALDI-TOF-MS spectrum of **2d-SbF<sub>6</sub>**.

## 7. Cyclic Voltammetry and Differential Pulse Voltammogram

Conditions: 0.1M  $n\text{Bu}_4\text{NPF}_6$  as electrolyte. Working electrode: Glassy carbon, counter electrode: Pt wire. Reference electrode: Ag/AgNO<sub>3</sub>. Scan rate: 0.05 V/s. Potentials (V) vs. ferrocene/ferrocenium ion couple.

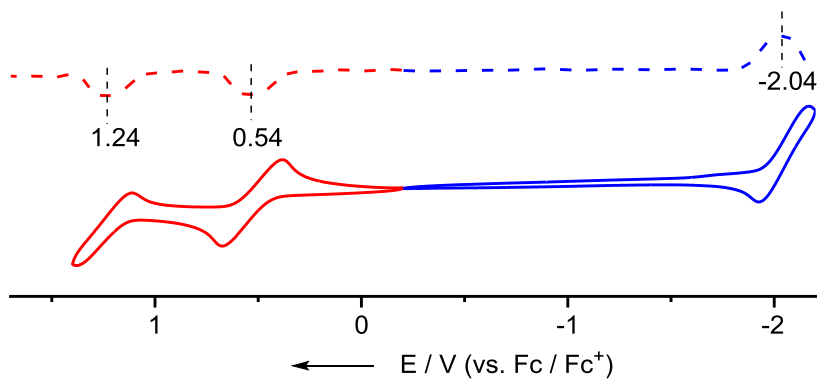

Fig. S71 Cyclic voltammogram and differential-pulse voltammogram of **1a**.

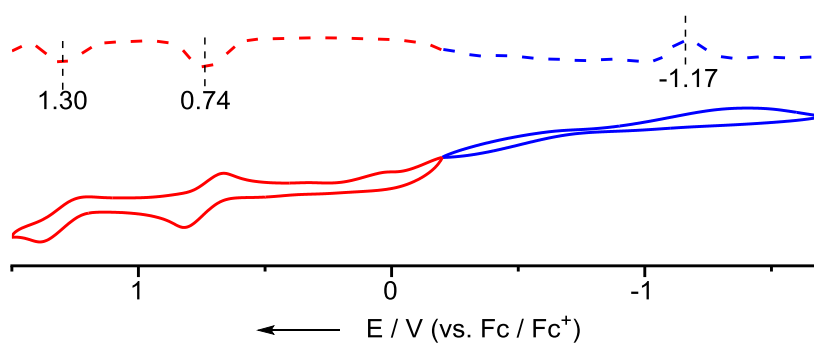

Fig. S72 Cyclic voltammogram and differential-pulse voltammogram of **2a-SbCl<sub>6</sub>**.

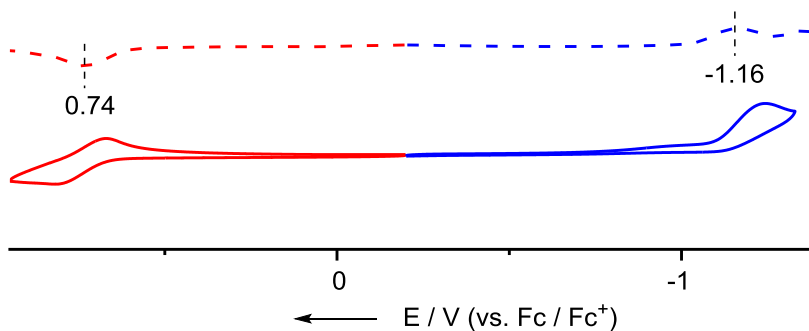

Fig. S73 Cyclic voltammogram and differential-pulse voltammogram of **2a-BAr<sup>F</sup>**.

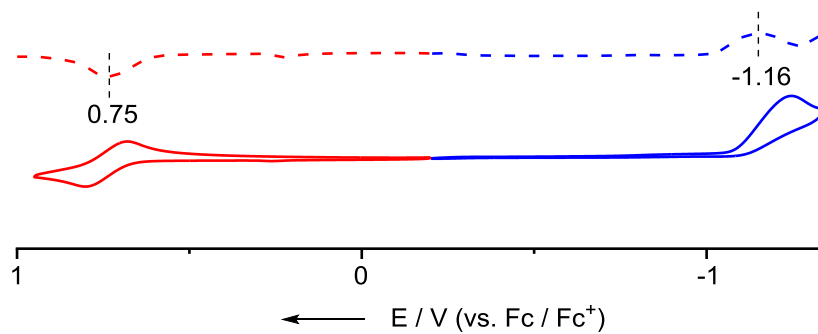

**Fig. S74** Cyclic voltammogram and differential-pulse voltammogram of **2a-SbF<sub>6</sub>**.

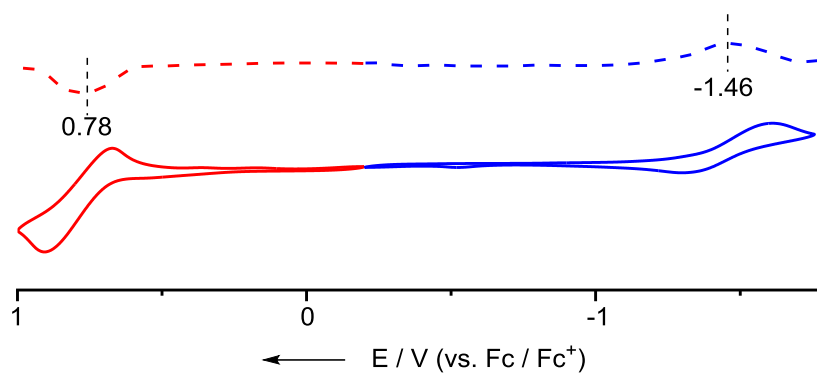

**Fig. S75** Cyclic voltammogram and differential-pulse voltammogram of **3a**.

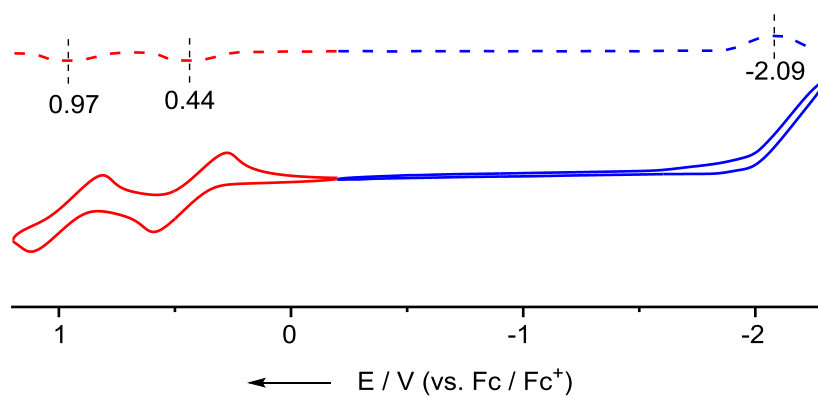

**Fig. S76** Cyclic voltammogram and differential-pulse voltammogram of **1b**.

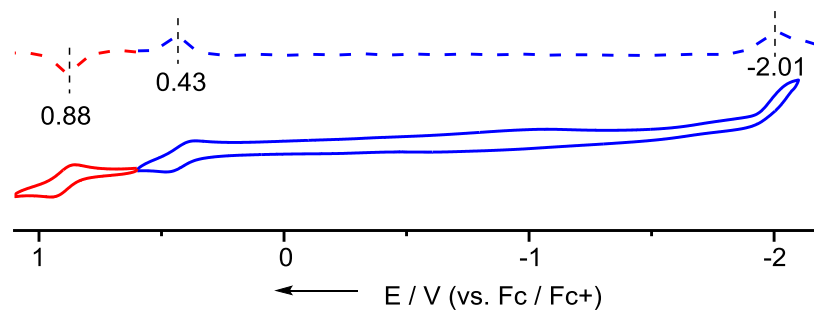

**Fig. S77** Cyclic voltammogram and differential-pulse voltammogram of **4b**.

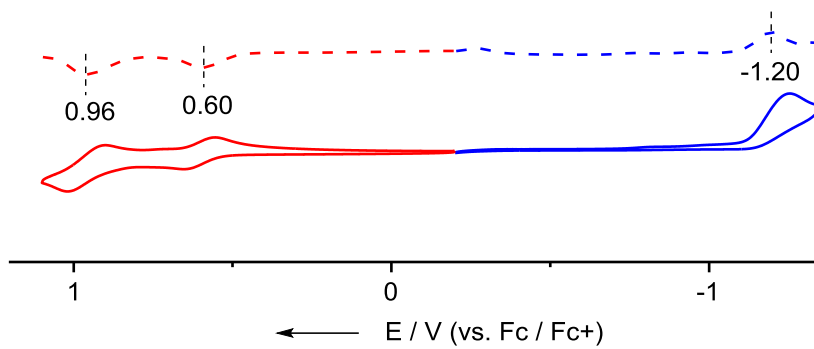

Fig. S78 Cyclic voltammogram and differential-pulse voltammogram of **2b-SbF<sub>6</sub>**.

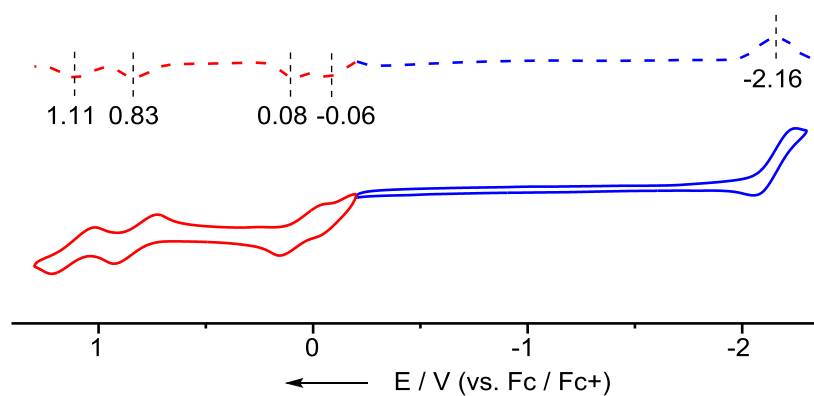

Fig. S79 Cyclic voltammogram and differential-pulse voltammogram of **1c**.

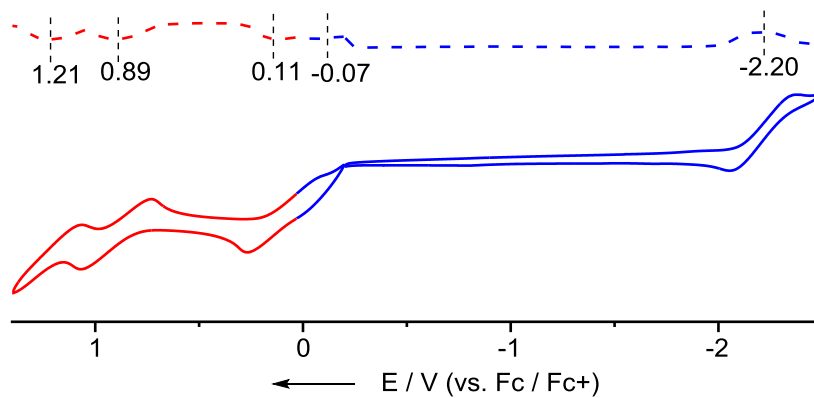

Fig. S80 Cyclic voltammogram and differential-pulse voltammogram of **4c**.

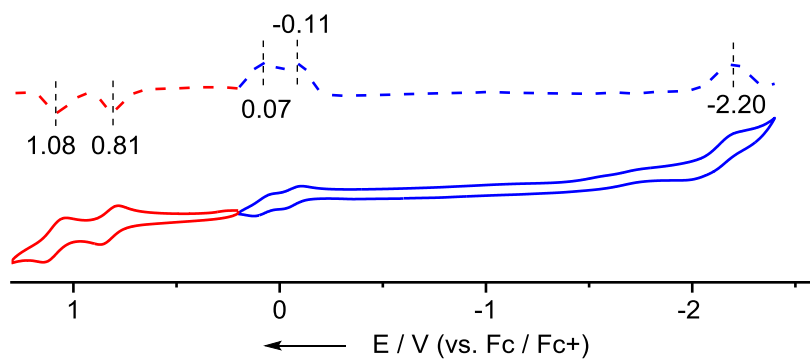

Fig. S81 Cyclic voltammogram and differential-pulse voltammogram of **7c**.

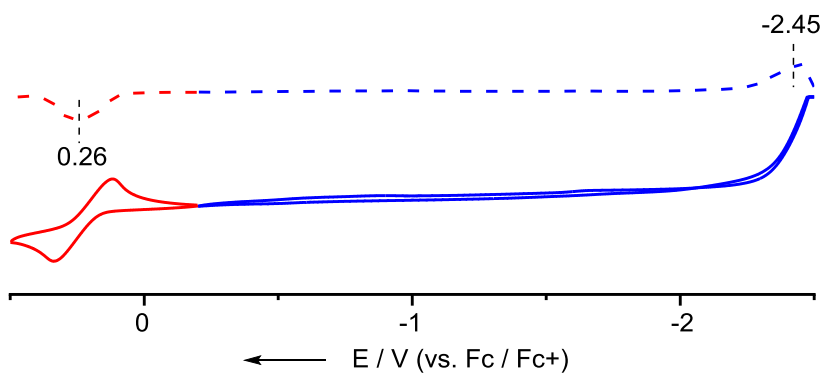

Fig. S82 Cyclic voltammogram and differential-pulse voltammogram of **1d-OH**.

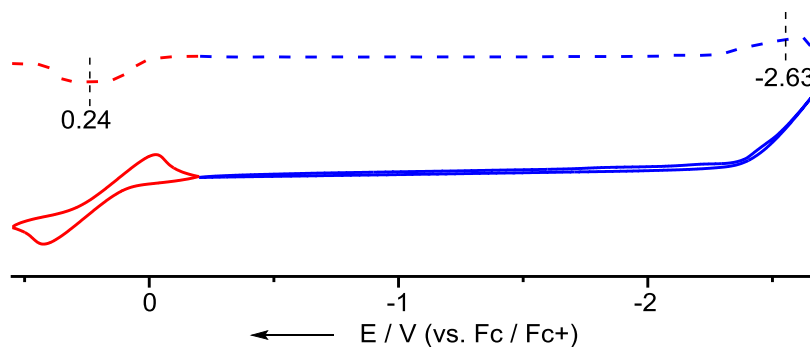

Fig. S83 Cyclic voltammogram and differential-pulse voltammogram of **1d**.

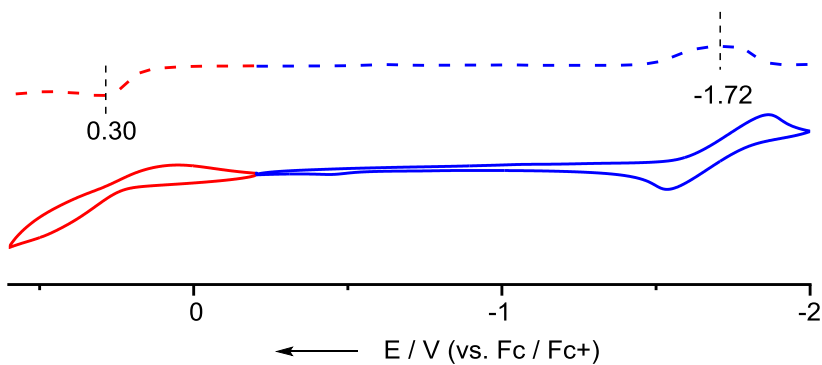

Fig. S84 Cyclic voltammogram and differential-pulse voltammogram of **2d-SbF<sub>6</sub>**.

**Table S16** Redox potentials and electrochemical HOMO–LUMO gaps

| sample                     | $E_{\text{Ox3}}$ [V] | $E_{\text{Ox2}}$ [V] | $E_{\text{Ox1}}$ [V] | $E_{\text{Red1}}$ [V] | $\Delta E$ [eV] <sup>[a]</sup> |
|----------------------------|----------------------|----------------------|----------------------|-----------------------|--------------------------------|
| <b>1a</b>                  | -                    | 1.24                 | 0.54                 | -2.04                 | 2.58                           |
| <b>2a-SbCl<sub>6</sub></b> | -                    | 1.30                 | 0.74                 | -1.17                 | 1.91                           |
| <b>2a-BAr<sup>F</sup></b>  | -                    | -                    | 0.74                 | -1.16                 | 1.90                           |
| <b>2a-SbF<sub>6</sub></b>  | -                    | -                    | 0.75                 | -1.16                 | 1.91                           |
| <b>3a</b>                  | -                    | -                    | 0.78                 | -1.46                 | 2.24                           |
| <b>1b</b>                  | -                    | 0.97                 | 0.44                 | -2.09                 | 2.53                           |
| <b>4b</b>                  | -                    | -                    | 0.88                 | 0.43                  | 0.45                           |
| <b>2b-SbF<sub>6</sub></b>  | -                    | 0.96                 | 0.60                 | -1.20                 | 1.80                           |
| <b>1c</b>                  | 0.83                 | 0.08                 | -0.06                | -2.16                 | 2.10                           |
| <b>4c</b>                  | 1.21                 | 0.89                 | 0.11                 | -0.07                 | 0.18                           |
| <b>7c</b>                  | -                    | 1.08                 | 0.81                 | 0.07                  | 0.74                           |
| <b>1d-OH</b>               | -                    | -                    | 0.26                 | -2.45                 | 2.71                           |
| <b>1d</b>                  | -                    | -                    | 0.24                 | -2.63                 | 2.87                           |
| <b>2d-SbF<sub>6</sub></b>  | -                    | -                    | 0.30                 | -1.72                 | 2.02                           |

[a]  $\Delta E = e(E_{\text{Ox1}} - E_{\text{Red1}})$ , that is, electrochemical HOMO–LUMO gaps.

## 8. Copy of EPR Spectra

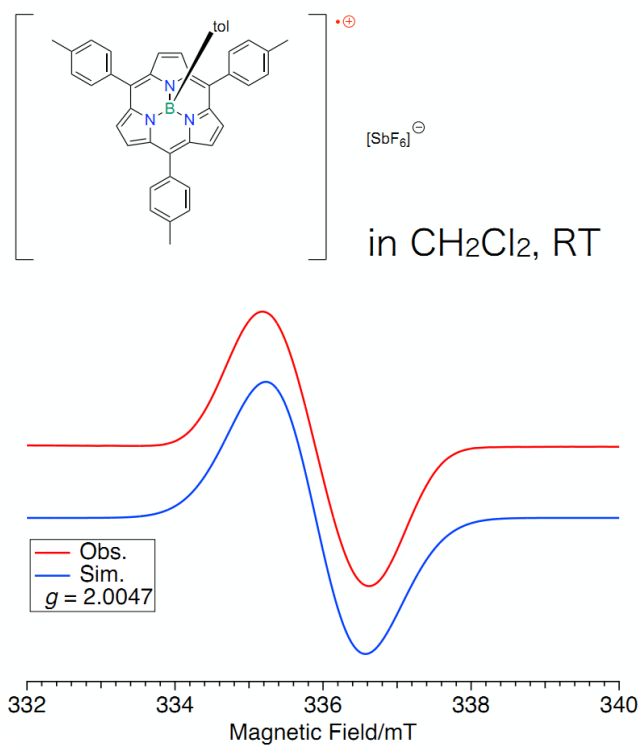

Fig. S85 EPR spectrum of **4a** (generated *in situ*) in DCM solution at room temperature.

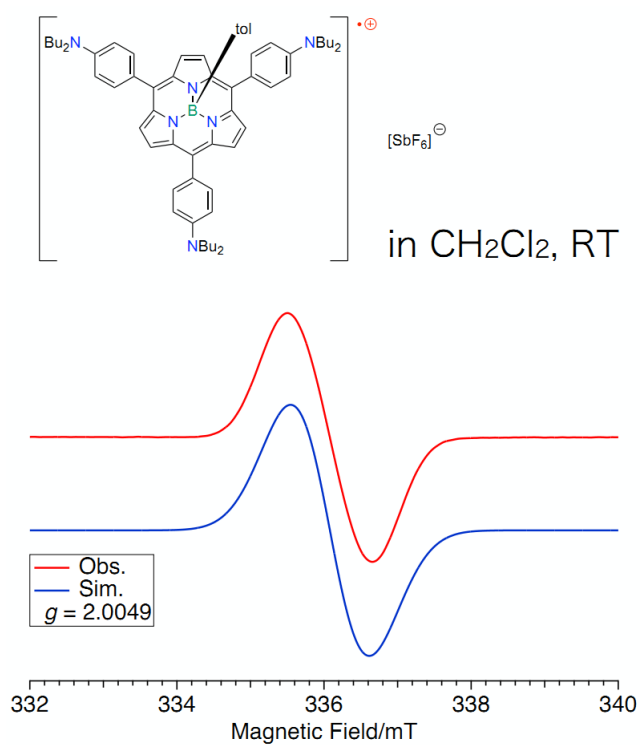

Fig. S86 EPR spectrum of **4c** in DCM solution at room temperature.



## 9. DFT Calculations

All calculations were carried out using the Gaussian 09 program (D.01 version).<sup>[5]</sup> Initial geometries of **1b**, **1c**, **2a**, **2b**, **2d**, **4b**, and **7c** were from corresponding X-ray structures. The optimization structure of all the minima and transition states were performed by the density functional theory (DFT) with B3LYP (Becke's three-parameter hybrid exchange functionals and the Lee-Yang-Parr correlation functional)<sup>[6]</sup> level using the 6-31G(d) basis set for all the atoms without any symmetry restriction. Harmonic frequency calculations were performed at the same level for every structure to confirm it as a local minimum or transition state and to derive the thermochemical corrections for enthalpies and free energies. The intrinsic reaction coordinate (IRC) analysis was carried out throughout the pathways to confirm that all stationary points are smoothly connected to each other. The effects of solvent CH<sub>2</sub>Cl<sub>2</sub> were considered by performing solvation model based on density (SMD) for all the structures (including transition states) in optimization and harmonic frequency calculation. All enthalpies, zero-point Energies and the Gibbs free energies in the text below were given in Hartree. All distances were given in Å.

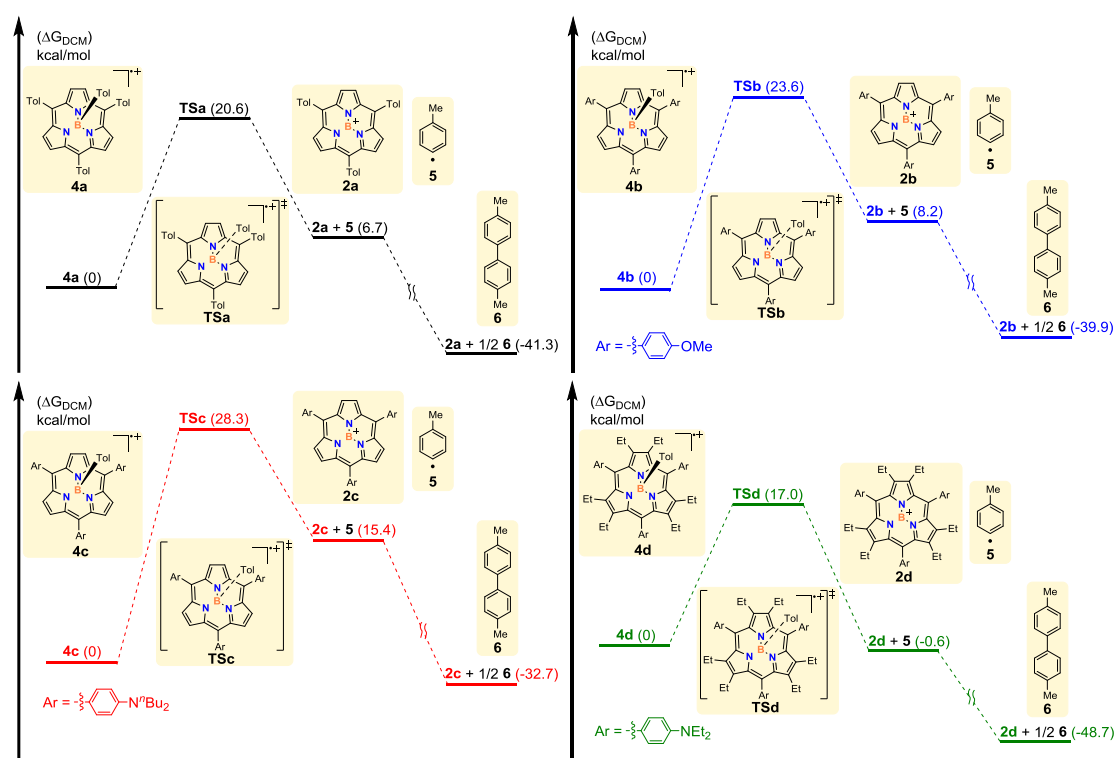

Fig. S87 DFT-calculated potential-energy surfaces of the transformation from **4a-d** to **2a-d**.  $\text{SbF}_6^-$  is not included in the calculations.

## Calculated Total Energies and Geometrical Coordinates

1a

|                                              |                             |
|----------------------------------------------|-----------------------------|
| Zero-point correction=                       | 0.656111 (Hartree/Particle) |
| Thermal correction to Energy=                | 0.694935                    |
| Thermal correction to Enthalpy=              | 0.695879                    |
| Thermal correction to Gibbs Free Energy=     | 0.578829                    |
| Sum of electronic and zero-point Energies=   | -1847.642773                |
| Sum of electronic and thermal Energies=      | -1847.603949                |
| Sum of electronic and thermal Enthalpies=    | -1847.603004                |
| Sum of electronic and thermal Free Energies= | -1847.720055                |

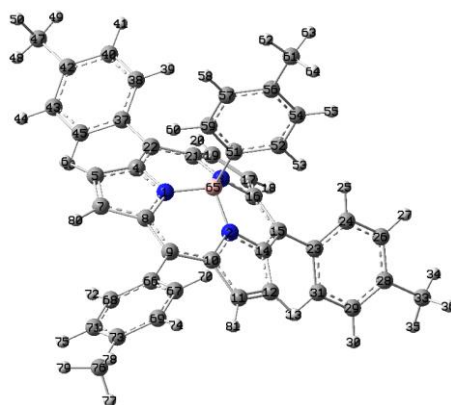

Fig. S88 Optimized structures of 1a.

Table S17 Coordinates of atoms in 1a.

| Center Number | Atomic Number | Atomic Type | Coordinates (Angstroms) |          |          |
|---------------|---------------|-------------|-------------------------|----------|----------|
|               |               |             | X                       | Y        | Z        |
| 1             | 7             | 0           | 4.394832                | 5.292740 | 3.880253 |
| 2             | 7             | 0           | 4.254266                | 6.766471 | 5.737379 |
| 3             | 7             | 0           | 6.374097                | 5.893955 | 5.062633 |
| 4             | 6             | 0           | 5.044522                | 4.301730 | 3.200598 |
| 5             | 6             | 0           | 4.011407                | 3.556856 | 2.523929 |
| 6             | 1             | 0           | 4.169427                | 2.708347 | 1.873661 |
| 7             | 6             | 0           | 2.789678                | 4.083806 | 2.899116 |
| 8             | 6             | 0           | 3.035448                | 5.167613 | 3.817890 |
| 9             | 6             | 0           | 2.230668                | 5.936354 | 4.709099 |
| 10            | 6             | 0           | 2.892440                | 6.661942 | 5.742630 |
| 11            | 6             | 0           | 2.466677                | 7.138490 | 7.034594 |
| 12            | 6             | 0           | 3.595852                | 7.435056 | 7.771194 |
| 13            | 1             | 0           | 3.621375                | 7.775585 | 8.796252 |
| 14            | 6             | 0           | 4.749170                | 7.128178 | 6.959286 |
| 15            | 6             | 0           | 6.136406                | 6.942671 | 7.230760 |
| 16            | 6             | 0           | 6.908830                | 6.216522 | 6.277883 |
| 17            | 6             | 0           | 8.117691                | 5.439042 | 6.397764 |
| 18            | 1             | 0           | 8.776147                | 5.442961 | 7.255398 |
| 19            | 6             | 0           | 8.207948                | 4.622646 | 5.289430 |
| 20            | 1             | 0           | 8.950652                | 3.858606 | 5.105680 |
| 21            | 6             | 0           | 7.056134                | 4.874703 | 4.459123 |
| 22            | 6             | 0           | 6.441863                | 4.119566 | 3.417374 |
| 23            | 6             | 0           | 6.749467                | 7.327191 | 8.522945 |

|    |   |   |            |            |            |
|----|---|---|------------|------------|------------|
| 24 | 6 | 0 | 7. 978517  | 8. 009965  | 8. 543323  |
| 25 | 1 | 0 | 8. 454188  | 8. 270902  | 7. 602149  |
| 26 | 6 | 0 | 8. 581293  | 8. 370160  | 9. 746462  |
| 27 | 1 | 0 | 9. 530537  | 8. 901368  | 9. 727618  |
| 28 | 6 | 0 | 7. 984807  | 8. 068283  | 10. 977258 |
| 29 | 6 | 0 | 6. 766398  | 7. 376329  | 10. 957899 |
| 30 | 1 | 0 | 6. 291195  | 7. 105623  | 11. 898407 |
| 31 | 6 | 0 | 6. 159725  | 7. 009503  | 9. 759093  |
| 32 | 1 | 0 | 5. 238070  | 6. 436486  | 9. 779901  |
| 33 | 6 | 0 | 8. 622766  | 8. 490591  | 12. 279592 |
| 34 | 1 | 0 | 9. 714556  | 8. 525517  | 12. 199276 |
| 35 | 1 | 0 | 8. 364707  | 7. 804858  | 13. 093727 |
| 36 | 1 | 0 | 8. 287601  | 9. 492400  | 12. 580702 |
| 37 | 6 | 0 | 7. 219011  | 3. 072229  | 2. 717579  |
| 38 | 6 | 0 | 8. 481713  | 3. 373617  | 2. 178247  |
| 39 | 1 | 0 | 8. 864591  | 4. 386609  | 2. 262943  |
| 40 | 6 | 0 | 9. 232613  | 2. 401373  | 1. 520732  |
| 41 | 1 | 0 | 10. 203841 | 2. 667323  | 1. 109169  |
| 42 | 6 | 0 | 8. 757092  | 1. 092567  | 1. 372436  |
| 43 | 6 | 0 | 7. 504168  | 0. 788075  | 1. 922260  |
| 44 | 1 | 0 | 7. 119156  | -0. 226565 | 1. 844414  |
| 45 | 6 | 0 | 6. 749139  | 1. 753444  | 2. 582934  |
| 46 | 1 | 0 | 5. 801051  | 1. 475712  | 3. 032977  |
| 47 | 6 | 0 | 9. 556435  | 0. 048834  | 0. 628708  |
| 48 | 1 | 0 | 9. 414453  | -0. 948315 | 1. 059734  |
| 49 | 1 | 0 | 10. 627497 | 0. 276166  | 0. 646153  |
| 50 | 1 | 0 | 9. 252888  | -0. 008404 | -0. 425405 |
| 51 | 6 | 0 | 5. 291648  | 7. 743837  | 3. 510698  |
| 52 | 6 | 0 | 5. 850711  | 8. 951157  | 3. 972286  |
| 53 | 1 | 0 | 6. 146564  | 9. 040904  | 5. 016159  |
| 54 | 6 | 0 | 6. 036961  | 10. 047425 | 3. 134193  |
| 55 | 1 | 0 | 6. 471702  | 10. 962984 | 3. 533096  |
| 56 | 6 | 0 | 5. 669997  | 9. 992193  | 1. 781045  |
| 57 | 6 | 0 | 5. 112607  | 8. 800828  | 1. 308943  |
| 58 | 1 | 0 | 4. 815712  | 8. 727912  | 0. 263932  |
| 59 | 6 | 0 | 4. 928724  | 7. 704601  | 2. 157022  |
| 60 | 1 | 0 | 4. 487698  | 6. 798720  | 1. 746263  |
| 61 | 6 | 0 | 5. 872633  | 11. 183660 | 0. 873152  |
| 62 | 1 | 0 | 5. 519356  | 10. 976210 | -0. 142351 |
| 63 | 1 | 0 | 6. 931886  | 11. 463872 | 0. 805789  |
| 64 | 1 | 0 | 5. 332549  | 12. 066175 | 1. 239584  |
| 65 | 5 | 0 | 5. 091332  | 6. 479009  | 4. 506991  |
| 66 | 6 | 0 | 0. 751678  | 5. 874431  | 4. 691290  |
| 67 | 6 | 0 | -0. 003885 | 7. 058785  | 4. 751186  |
| 68 | 6 | 0 | 0. 052987  | 4. 656189  | 4. 629716  |
| 69 | 6 | 0 | -1. 396264 | 7. 023472  | 4. 739289  |
| 70 | 1 | 0 | 0. 512476  | 8. 013970  | 4. 781188  |
| 71 | 6 | 0 | -1. 339604 | 4. 629147  | 4. 615735  |
| 72 | 1 | 0 | 0. 606625  | 3. 722295  | 4. 622196  |
| 73 | 6 | 0 | -2. 092260 | 5. 809549  | 4. 671201  |
| 74 | 1 | 0 | -1. 952464 | 7. 957857  | 4. 773986  |
| 75 | 1 | 0 | -1. 852445 | 3. 670612  | 4. 572079  |
| 76 | 6 | 0 | -3. 602335 | 5. 773838  | 4. 687768  |
| 77 | 1 | 0 | -3. 989149 | 5. 755218  | 5. 715725  |
| 78 | 1 | 0 | -4. 029542 | 6. 655513  | 4. 197926  |
| 79 | 1 | 0 | -3. 988494 | 4. 883741  | 4. 179848  |
| 80 | 1 | 0 | 1. 817222  | 3. 722526  | 2. 596333  |

**1b**

|                                              |                             |
|----------------------------------------------|-----------------------------|
| Zero-point correction=                       | 0.672303 (Hartree/Particle) |
| Thermal correction to Energy=                | 0.712747                    |
| Thermal correction to Enthalpy=              | 0.713691                    |
| Thermal correction to Gibbs Free Energy=     | 0.598171                    |
| Sum of electronic and zero-point Energies=   | -2073.290872                |
| Sum of electronic and thermal Energies=      | -2073.250429                |
| Sum of electronic and thermal Enthalpies=    | -2073.249485                |
| Sum of electronic and thermal Free Energies= | -2073.365005                |

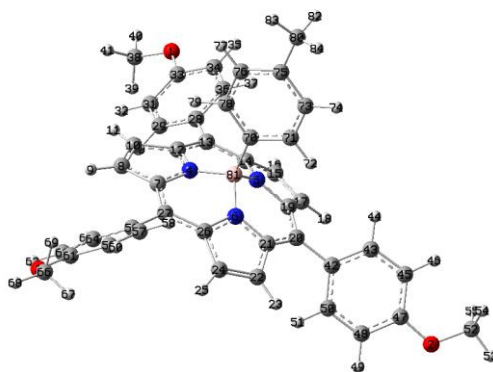**Fig. S89** Optimized structures of **1b**.**Table S18** Coordinates of atoms in **1b**.

| Center Number | Atomic Number | Atomic Type | Coordinates (Angstroms) |           |           |
|---------------|---------------|-------------|-------------------------|-----------|-----------|
|               |               |             | X                       | Y         | Z         |
| 1             | 8             | 0           | 6.678664                | 14.323976 | 5.549494  |
| 2             | 8             | 0           | 7.833547                | 1.323847  | 0.125915  |
| 3             | 8             | 0           | -1.630013               | 3.430977  | 10.790261 |
| 4             | 7             | 0           | 4.558102                | 6.944344  | 7.413968  |
| 5             | 7             | 0           | 6.233436                | 6.523945  | 5.772708  |
| 6             | 7             | 0           | 4.864421                | 4.741069  | 6.583649  |
| 7             | 6             | 0           | 3.406457                | 6.590014  | 8.063004  |
| 8             | 6             | 0           | 2.807591                | 7.830986  | 8.487856  |
| 9             | 1             | 0           | 1.886636                | 7.932054  | 9.044815  |
| 10            | 6             | 0           | 3.581672                | 8.869060  | 8.001454  |
| 11            | 1             | 0           | 3.371726                | 9.923711  | 8.112010  |
| 12            | 6             | 0           | 4.680405                | 8.298676  | 7.261998  |
| 13            | 6             | 0           | 5.661913                | 8.806413  | 6.358445  |
| 14            | 6             | 0           | 6.348718                | 7.866037  | 5.532241  |
| 15            | 6             | 0           | 6.962195                | 7.982606  | 4.233221  |
| 16            | 1             | 0           | 7.181482                | 8.913160  | 3.727276  |
| 17            | 6             | 0           | 7.104490                | 6.710406  | 3.714793  |
| 18            | 1             | 0           | 7.456575                | 6.452754  | 2.725045  |
| 19            | 6             | 0           | 6.585559                | 5.776073  | 4.682309  |
| 20            | 6             | 0           | 6.165022                | 4.416419  | 4.577407  |
| 21            | 6             | 0           | 5.206625                | 3.944195  | 5.523863  |

|    |   |   |            |            |            |
|----|---|---|------------|------------|------------|
| 22 | 6 | 0 | 4. 276291  | 2. 841905  | 5. 551258  |
| 23 | 1 | 0 | 4. 262576  | 2. 010781  | 4. 860549  |
| 24 | 6 | 0 | 3. 357618  | 3. 084245  | 6. 554707  |
| 25 | 1 | 0 | 2. 484463  | 2. 488755  | 6. 784865  |
| 26 | 6 | 0 | 3. 708093  | 4. 330608  | 7. 187087  |
| 27 | 6 | 0 | 2. 994285  | 5. 223145  | 8. 043033  |
| 28 | 6 | 0 | 5. 875919  | 10. 255625 | 6. 147288  |
| 29 | 6 | 0 | 4. 814546  | 11. 163122 | 5. 995952  |
| 30 | 1 | 0 | 3. 792008  | 10. 799226 | 6. 001207  |
| 31 | 6 | 0 | 5. 035970  | 12. 526609 | 5. 795637  |
| 32 | 1 | 0 | 4. 186871  | 13. 188889 | 5. 670934  |
| 33 | 6 | 0 | 6. 347300  | 13. 017881 | 5. 738035  |
| 34 | 6 | 0 | 7. 422340  | 12. 125036 | 5. 875424  |
| 35 | 1 | 0 | 8. 435264  | 12. 514616 | 5. 832451  |
| 36 | 6 | 0 | 7. 187279  | 10. 771677 | 6. 074341  |
| 37 | 1 | 0 | 8. 031112  | 10. 098948 | 6. 196951  |
| 38 | 6 | 0 | 5. 626687  | 15. 277534 | 5. 409583  |
| 39 | 1 | 0 | 5. 004527  | 15. 063673 | 4. 531981  |
| 40 | 1 | 0 | 6. 117270  | 16. 243854 | 5. 276416  |
| 41 | 1 | 0 | 4. 995188  | 15. 312943 | 6. 306039  |
| 42 | 6 | 0 | 6. 606883  | 3. 603367  | 3. 420662  |
| 43 | 6 | 0 | 7. 968862  | 3. 536426  | 3. 083466  |
| 44 | 1 | 0 | 8. 694695  | 4. 065352  | 3. 694518  |
| 45 | 6 | 0 | 8. 424321  | 2. 788303  | 1. 996065  |
| 46 | 1 | 0 | 9. 486289  | 2. 759426  | 1. 780167  |
| 47 | 6 | 0 | 7. 506855  | 2. 082112  | 1. 207498  |
| 48 | 6 | 0 | 6. 139306  | 2. 143454  | 1. 522953  |
| 49 | 1 | 0 | 5. 433542  | 1. 607916  | 0. 894576  |
| 50 | 6 | 0 | 5. 700897  | 2. 891530  | 2. 606521  |
| 51 | 1 | 0 | 4. 635939  | 2. 951026  | 2. 806256  |
| 52 | 6 | 0 | 9. 208595  | 1. 223159  | -0. 241375 |
| 53 | 1 | 0 | 9. 233916  | 0. 584721  | -1. 126758 |
| 54 | 1 | 0 | 9. 803697  | 0. 760837  | 0. 555680  |
| 55 | 1 | 0 | 9. 630334  | 2. 204327  | -0. 491539 |
| 56 | 6 | 0 | 1. 787358  | 4. 748134  | 8. 756481  |
| 57 | 6 | 0 | 1. 833146  | 3. 561814  | 9. 507290  |
| 58 | 1 | 0 | 2. 766543  | 3. 010192  | 9. 572285  |
| 59 | 6 | 0 | 0. 719310  | 3. 083895  | 10. 200012 |
| 60 | 1 | 0 | 0. 804859  | 2. 168633  | 10. 774715 |
| 61 | 6 | 0 | -0. 485493 | 3. 796966  | 10. 151738 |
| 62 | 6 | 0 | -0. 555365 | 4. 978561  | 9. 394909  |
| 63 | 1 | 0 | -1. 499406 | 5. 513728  | 9. 347509  |
| 64 | 6 | 0 | 0. 559770  | 5. 441275  | 8. 710184  |
| 65 | 1 | 0 | 0. 471286  | 6. 339487  | 8. 107258  |
| 66 | 6 | 0 | -1. 610297 | 2. 251604  | 11. 593371 |
| 67 | 1 | 0 | -1. 389813 | 1. 360681  | 10. 992574 |
| 68 | 1 | 0 | -2. 613540 | 2. 161815  | 12. 014802 |
| 69 | 1 | 0 | -0. 880319 | 2. 333396  | 12. 408136 |
| 70 | 6 | 0 | 6. 721543  | 5. 669298  | 8. 228687  |
| 71 | 6 | 0 | 7. 759138  | 4. 731693  | 8. 058720  |
| 72 | 1 | 0 | 7. 833388  | 4. 177328  | 7. 124651  |
| 73 | 6 | 0 | 8. 704056  | 4. 482560  | 9. 054152  |
| 74 | 1 | 0 | 9. 488280  | 3. 746955  | 8. 881197  |
| 75 | 6 | 0 | 8. 659721  | 5. 163490  | 10. 280839 |
| 76 | 6 | 0 | 7. 630933  | 6. 094682  | 10. 466945 |
| 77 | 1 | 0 | 7. 563902  | 6. 634974  | 11. 409947 |
| 78 | 6 | 0 | 6. 687949  | 6. 337789  | 9. 463121  |

|    |   |   |           |          |           |
|----|---|---|-----------|----------|-----------|
| 79 | 1 | 0 | 5.905100  | 7.068994 | 9.654180  |
| 80 | 6 | 0 | 9.699713  | 4.915559 | 11.348743 |
| 81 | 5 | 0 | 5.639182  | 5.957028 | 7.044434  |
| 82 | 1 | 0 | 10.617379 | 5.488705 | 11.155651 |
| 83 | 1 | 0 | 9.336020  | 5.210414 | 12.339218 |
| 84 | 1 | 0 | 9.987201  | 3.858574 | 11.392997 |

### 1c

|                                              |                             |
|----------------------------------------------|-----------------------------|
| Zero-point correction=                       | 1.308583 (Hartree/Particle) |
| Thermal correction to Energy=                | 1.378308                    |
| Thermal correction to Enthalpy=              | 1.379252                    |
| Thermal correction to Gibbs Free Energy=     | 1.193058                    |
| Sum of electronic and zero-point Energies=   | -2838.667961                |
| Sum of electronic and thermal Energies=      | -2838.598236                |
| Sum of electronic and thermal Enthalpies=    | -2838.597292                |
| Sum of electronic and thermal Free Energies= | -2838.783486                |

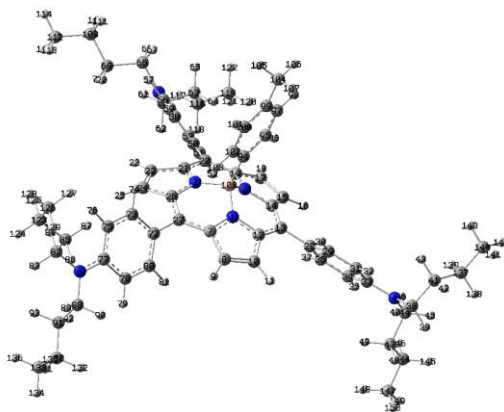

Fig. S90 Optimized structures of 1c.

Table S19 Coordinates of atoms in 1c.

| Center Number | Atomic Number | Atomic Type | Coordinates (Angstroms) |           |          |
|---------------|---------------|-------------|-------------------------|-----------|----------|
|               |               |             | X                       | Y         | Z        |
| 1             | 7             | 0           | 23.526487               | 13.133367 | 5.112208 |
| 2             | 7             | 0           | 24.625465               | 14.842939 | 6.336428 |
| 3             | 7             | 0           | 22.246825               | 14.697808 | 6.389414 |
| 4             | 7             | 0           | 30.831723               | 11.722068 | 2.436926 |
| 5             | 7             | 0           | 22.909067               | 21.725935 | 9.949906 |
| 6             | 7             | 0           | 16.282086               | 11.813482 | 2.077181 |
| 7             | 6             | 0           | 22.421877               | 12.752986 | 4.397026 |
| 8             | 6             | 0           | 22.926971               | 11.989185 | 3.283742 |
| 9             | 1             | 0           | 22.328106               | 11.521098 | 2.515473 |
| 10            | 6             | 0           | 24.308486               | 12.036705 | 3.324773 |
| 11            | 1             | 0           | 24.987397               | 11.629762 | 2.587559 |
| 12            | 6             | 0           | 24.693921               | 12.810403 | 4.475975 |
| 13            | 6             | 0           | 25.919708               | 13.435584 | 4.865375 |
| 14            | 6             | 0           | 25.833493               | 14.544886 | 5.764176 |
| 15            | 6             | 0           | 26.713629               | 15.617789 | 6.150307 |
| 16            | 1             | 0           | 27.759186               | 15.705254 | 5.890542 |

|    |   |   |            |            |            |
|----|---|---|------------|------------|------------|
| 17 | 6 | 0 | 25. 973038 | 16. 547092 | 6. 860999  |
| 18 | 1 | 0 | 26. 340537 | 17. 484839 | 7. 253165  |
| 19 | 6 | 0 | 24. 614148 | 16. 073895 | 6. 935436  |
| 20 | 6 | 0 | 23. 361653 | 16. 644335 | 7. 323833  |
| 21 | 6 | 0 | 22. 173456 | 15. 959737 | 6. 916368  |
| 22 | 6 | 0 | 20. 836027 | 16. 420221 | 6. 646096  |
| 23 | 1 | 0 | 20. 445666 | 17. 393850 | 6. 909899  |
| 24 | 6 | 0 | 20. 194944 | 15. 452583 | 5. 895717  |
| 25 | 1 | 0 | 19. 207622 | 15. 523755 | 5. 459749  |
| 26 | 6 | 0 | 21. 120418 | 14. 369980 | 5. 683385  |
| 27 | 6 | 0 | 21. 146124 | 13. 301084 | 4. 734879  |
| 28 | 6 | 0 | 27. 187322 | 13. 017063 | 4. 235183  |
| 29 | 6 | 0 | 27. 514703 | 11. 652739 | 4. 115019  |
| 30 | 1 | 0 | 26. 834865 | 10. 906748 | 4. 517814  |
| 31 | 6 | 0 | 28. 698882 | 11. 222302 | 3. 529946  |
| 32 | 1 | 0 | 28. 893268 | 10. 157330 | 3. 498439  |
| 33 | 6 | 0 | 29. 645817 | 12. 142500 | 3. 009985  |
| 34 | 6 | 0 | 29. 305731 | 13. 517069 | 3. 113437  |
| 35 | 1 | 0 | 29. 959857 | 14. 276205 | 2. 702175  |
| 36 | 6 | 0 | 28. 120581 | 13. 930362 | 3. 708034  |
| 37 | 1 | 0 | 27. 897446 | 14. 992904 | 3. 722903  |
| 38 | 6 | 0 | 31. 102104 | 10. 298771 | 2. 209127  |
| 39 | 1 | 0 | 31. 800339 | 10. 233374 | 1. 367804  |
| 40 | 1 | 0 | 30. 183227 | 9. 799589  | 1. 879495  |
| 41 | 6 | 0 | 31. 694257 | 9. 546908  | 3. 415514  |
| 42 | 1 | 0 | 31. 762159 | 8. 484698  | 3. 138090  |
| 43 | 1 | 0 | 30. 996835 | 9. 601420  | 4. 261553  |
| 44 | 6 | 0 | 31. 778166 | 12. 675927 | 1. 852969  |
| 45 | 1 | 0 | 32. 763339 | 12. 199764 | 1. 859068  |
| 46 | 1 | 0 | 31. 864155 | 13. 550772 | 2. 506698  |
| 47 | 6 | 0 | 31. 435186 | 13. 113501 | 0. 419253  |
| 48 | 1 | 0 | 31. 366684 | 12. 220572 | -0. 218011 |
| 49 | 1 | 0 | 30. 442696 | 13. 582870 | 0. 406258  |
| 50 | 6 | 0 | 23. 257678 | 17. 959532 | 7. 984319  |
| 51 | 6 | 0 | 24. 034537 | 19. 071464 | 7. 605014  |
| 52 | 1 | 0 | 24. 725010 | 18. 984035 | 6. 771898  |
| 53 | 6 | 0 | 23. 926129 | 20. 301186 | 8. 240444  |
| 54 | 1 | 0 | 24. 561274 | 21. 109740 | 7. 898939  |
| 55 | 6 | 0 | 23. 015214 | 20. 507515 | 9. 309623  |
| 56 | 6 | 0 | 22. 219255 | 19. 392401 | 9. 680136  |
| 57 | 1 | 0 | 21. 489154 | 19. 478865 | 10. 476248 |
| 58 | 6 | 0 | 22. 343943 | 18. 167952 | 9. 036233  |
| 59 | 1 | 0 | 21. 724555 | 17. 340574 | 9. 372326  |
| 60 | 6 | 0 | 23. 646162 | 22. 905702 | 9. 494834  |
| 61 | 1 | 0 | 23. 054599 | 23. 785660 | 9. 772664  |
| 62 | 1 | 0 | 23. 692560 | 22. 908209 | 8. 400398  |
| 63 | 6 | 0 | 25. 058142 | 23. 032706 | 10. 088699 |
| 64 | 1 | 0 | 25. 645823 | 22. 143472 | 9. 824913  |
| 65 | 1 | 0 | 24. 982514 | 23. 042420 | 11. 185152 |
| 66 | 6 | 0 | 22. 072315 | 21. 905098 | 11. 136931 |
| 67 | 1 | 0 | 22. 103966 | 20. 995244 | 11. 746133 |
| 68 | 1 | 0 | 22. 533988 | 22. 691226 | 11. 745608 |
| 69 | 6 | 0 | 20. 616708 | 22. 290483 | 10. 828937 |
| 70 | 1 | 0 | 20. 153251 | 21. 504802 | 10. 217786 |
| 71 | 1 | 0 | 20. 613234 | 23. 204039 | 10. 217661 |
| 72 | 6 | 0 | 19. 904127 | 12. 921612 | 4. 030884  |
| 73 | 6 | 0 | 18. 714472 | 12. 687986 | 4. 747497  |

|     |   |   |            |            |            |
|-----|---|---|------------|------------|------------|
| 74  | 1 | 0 | 18. 724664 | 12. 764410 | 5. 831632  |
| 75  | 6 | 0 | 17. 529549 | 12. 323477 | 4. 120425  |
| 76  | 1 | 0 | 16. 663511 | 12. 123835 | 4. 740112  |
| 77  | 6 | 0 | 17. 452760 | 12. 179198 | 2. 710835  |
| 78  | 6 | 0 | 18. 646519 | 12. 436693 | 1. 986900  |
| 79  | 1 | 0 | 18. 650583 | 12. 389251 | 0. 904543  |
| 80  | 6 | 0 | 19. 825383 | 12. 788575 | 2. 631251  |
| 81  | 1 | 0 | 20. 697074 | 13. 007652 | 2. 022179  |
| 82  | 6 | 0 | 15. 024415 | 11. 654318 | 2. 808384  |
| 83  | 1 | 0 | 14. 210438 | 11. 886013 | 2. 111840  |
| 84  | 1 | 0 | 14. 965596 | 12. 407350 | 3. 601813  |
| 85  | 6 | 0 | 14. 809622 | 10. 248326 | 3. 391579  |
| 86  | 1 | 0 | 14. 870949 | 9. 512388  | 2. 577581  |
| 87  | 1 | 0 | 15. 627017 | 10. 013004 | 4. 085994  |
| 88  | 6 | 0 | 16. 233388 | 11. 537333 | 0. 640099  |
| 89  | 1 | 0 | 15. 448178 | 10. 790846 | 0. 483911  |
| 90  | 1 | 0 | 17. 169475 | 11. 062142 | 0. 326081  |
| 91  | 6 | 0 | 15. 956530 | 12. 781476 | -0. 221534 |
| 92  | 1 | 0 | 16. 719212 | 13. 539150 | -0. 001626 |
| 93  | 1 | 0 | 14. 991810 | 13. 214444 | 0. 078699  |
| 94  | 6 | 0 | 23. 588318 | 12. 862939 | 7. 743394  |
| 95  | 6 | 0 | 24. 554019 | 13. 018516 | 8. 749922  |
| 96  | 1 | 0 | 25. 291214 | 13. 814711 | 8. 667114  |
| 97  | 6 | 0 | 24. 604805 | 12. 179360 | 9. 868888  |
| 98  | 1 | 0 | 25. 371431 | 12. 338243 | 10. 625601 |
| 99  | 6 | 0 | 23. 684693 | 11. 138260 | 10. 033900 |
| 100 | 6 | 0 | 22. 714060 | 10. 966299 | 9. 033353  |
| 101 | 1 | 0 | 21. 983899 | 10. 163822 | 9. 129938  |
| 102 | 6 | 0 | 22. 672083 | 11. 806602 | 7. 921775  |
| 103 | 1 | 0 | 21. 902230 | 11. 632779 | 7. 171838  |
| 104 | 6 | 0 | 23. 731035 | 10. 223867 | 11. 235977 |
| 105 | 1 | 0 | 22. 763881 | 10. 189580 | 11. 753489 |
| 106 | 1 | 0 | 24. 485840 | 10. 551773 | 11. 958727 |
| 107 | 1 | 0 | 23. 973367 | 9. 191991  | 10. 948149 |
| 108 | 5 | 0 | 23. 497140 | 13. 846683 | 6. 445362  |
| 109 | 6 | 0 | 19. 787222 | 22. 517181 | 12. 098894 |
| 110 | 1 | 0 | 20. 262328 | 23. 299524 | 12. 708100 |
| 111 | 1 | 0 | 19. 799882 | 21. 603311 | 12. 710053 |
| 112 | 6 | 0 | 18. 336819 | 22. 911637 | 11. 806369 |
| 113 | 1 | 0 | 17. 822543 | 22. 134663 | 11. 226588 |
| 114 | 1 | 0 | 17. 770416 | 23. 064239 | 12. 732997 |
| 115 | 1 | 0 | 18. 286327 | 23. 843540 | 11. 228801 |
| 116 | 6 | 0 | 25. 788105 | 24. 294838 | 9. 611597  |
| 117 | 1 | 0 | 25. 187732 | 25. 180628 | 9. 864931  |
| 118 | 1 | 0 | 25. 863144 | 24. 279439 | 8. 514708  |
| 119 | 6 | 0 | 27. 188487 | 24. 440391 | 10. 214224 |
| 120 | 1 | 0 | 27. 825943 | 23. 586904 | 9. 950383  |
| 121 | 1 | 0 | 27. 684922 | 25. 349592 | 9. 854305  |
| 122 | 1 | 0 | 27. 146339 | 24. 495565 | 11. 309470 |
| 123 | 6 | 0 | 13. 463005 | 10. 107132 | 4. 111927  |
| 124 | 1 | 0 | 12. 648912 | 10. 349519 | 3. 413730  |
| 125 | 1 | 0 | 13. 403388 | 10. 849325 | 4. 920880  |
| 126 | 6 | 0 | 13. 237985 | 8. 706673  | 4. 689185  |
| 127 | 1 | 0 | 14. 018615 | 8. 446227  | 5. 415099  |
| 128 | 1 | 0 | 12. 270874 | 8. 636208  | 5. 201541  |
| 129 | 1 | 0 | 13. 252487 | 7. 944324  | 3. 899748  |
| 130 | 6 | 0 | 15. 946385 | 12. 500986 | -1. 733416 |



|     |   |   |           |           |           |
|-----|---|---|-----------|-----------|-----------|
| 131 | 1 | 0 | 15.864724 | 13.460476 | -2.261215 |
| 132 | 1 | 0 | 16.915264 | 12.073079 | -2.029313 |
| 133 | 6 | 0 | 14.816556 | 11.578266 | -2.205535 |
| 134 | 1 | 0 | 14.822801 | 11.479493 | -3.297787 |
| 135 | 1 | 0 | 14.904636 | 10.568826 | -1.786742 |
| 136 | 1 | 0 | 13.834793 | 11.973979 | -1.914296 |
| 137 | 6 | 0 | 33.073429 | 10.043408 | 3.866078  |
| 138 | 1 | 0 | 33.779513 | 9.973163  | 3.025908  |
| 139 | 1 | 0 | 33.009114 | 11.106860 | 4.131488  |
| 140 | 6 | 0 | 33.625468 | 9.258451  | 5.060186  |
| 141 | 1 | 0 | 33.729246 | 8.191679  | 4.823416  |
| 142 | 1 | 0 | 34.613111 | 9.629772  | 5.359807  |
| 143 | 1 | 0 | 32.961864 | 9.341230  | 5.930334  |
| 144 | 6 | 0 | 32.473067 | 14.081913 | -0.162428 |
| 145 | 1 | 0 | 33.465443 | 13.609252 | -0.137004 |
| 146 | 1 | 0 | 32.541303 | 14.971321 | 0.480257  |
| 147 | 6 | 0 | 32.153566 | 14.514831 | -1.596069 |
| 148 | 1 | 0 | 31.182197 | 15.022306 | -1.651966 |
| 149 | 1 | 0 | 32.911955 | 15.206750 | -1.982112 |
| 150 | 1 | 0 | 32.115478 | 13.652269 | -2.273521 |

### 1d

|                                              |                             |
|----------------------------------------------|-----------------------------|
| Zero-point correction=                       | 1.304947 (Hartree/Particle) |
| Thermal correction to Energy=                | 1.376812                    |
| Thermal correction to Enthalpy=              | 1.377756                    |
| Thermal correction to Gibbs Free Energy=     | 1.190071                    |
| Sum of electronic and zero-point Energies=   | -2838.653205                |
| Sum of electronic and thermal Energies=      | -2838.581339                |
| Sum of electronic and thermal Enthalpies=    | -2838.580395                |
| Sum of electronic and thermal Free Energies= | -2838.768080                |

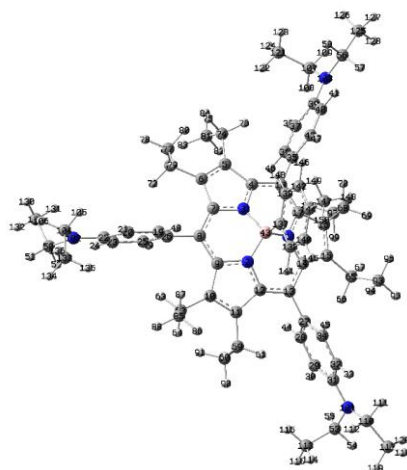

Fig. S91 Optimized structures of 1d.

Table S20 Coordinates of atoms in 1d.

| Center Number | Atomic Number | Atomic Type | Coordinates (Angstroms) |   |   |
|---------------|---------------|-------------|-------------------------|---|---|
|               |               |             | X                       | Y | Z |

---

|    |   |   |            |            |            |
|----|---|---|------------|------------|------------|
| 1  | 7 | 0 | 4. 441854  | 9. 437153  | 3. 935343  |
| 2  | 7 | 0 | 2. 492121  | 10. 431013 | 4. 866249  |
| 3  | 7 | 0 | 3. 432690  | 11. 299418 | 2. 862000  |
| 4  | 6 | 0 | 4. 194041  | 11. 120697 | 1. 741849  |
| 5  | 6 | 0 | 3. 628598  | 12. 013853 | 0. 740346  |
| 6  | 6 | 0 | 2. 509143  | 12. 628404 | 1. 302376  |
| 7  | 6 | 0 | 2. 353748  | 12. 113421 | 2. 655058  |
| 8  | 6 | 0 | 1. 316749  | 12. 136954 | 3. 637905  |
| 9  | 6 | 0 | 1. 367758  | 11. 194466 | 4. 712537  |
| 10 | 6 | 0 | 0. 396194  | 10. 650009 | 5. 649312  |
| 11 | 6 | 0 | 0. 967240  | 9. 526308  | 6. 247222  |
| 12 | 6 | 0 | 2. 307372  | 9. 366161  | 5. 702376  |
| 13 | 6 | 0 | 3. 305256  | 8. 342254  | 5. 749593  |
| 14 | 6 | 0 | 4. 352643  | 8. 363867  | 4. 779371  |
| 15 | 6 | 0 | 5. 314997  | 7. 391498  | 4. 277799  |
| 16 | 6 | 0 | 5. 851240  | 7. 898161  | 3. 095139  |
| 17 | 6 | 0 | 5. 244334  | 9. 199545  | 2. 854217  |
| 18 | 6 | 0 | 5. 199202  | 10. 104123 | 1. 750148  |
| 19 | 6 | 0 | 0. 067067  | 14. 289728 | 4. 067536  |
| 20 | 6 | 0 | -1. 037657 | 15. 126070 | 3. 923378  |
| 21 | 1 | 0 | -1. 025469 | 16. 082470 | 4. 432260  |
| 22 | 6 | 0 | -2. 161574 | 14. 737436 | 3. 152003  |
| 23 | 6 | 0 | -2. 097871 | 13. 456879 | 2. 543334  |
| 24 | 1 | 0 | -2. 914363 | 13. 102293 | 1. 925332  |
| 25 | 6 | 0 | -0. 986737 | 12. 633868 | 2. 703658  |
| 26 | 6 | 0 | 0. 125245  | 13. 024468 | 3. 466089  |
| 27 | 6 | 0 | 3. 176437  | 7. 211154  | 6. 720251  |
| 28 | 6 | 0 | 2. 558850  | 5. 998085  | 6. 376880  |
| 29 | 6 | 0 | 2. 425574  | 4. 954793  | 7. 287434  |
| 30 | 1 | 0 | 1. 940054  | 4. 046709  | 6. 950734  |
| 31 | 6 | 0 | 2. 918552  | 5. 059388  | 8. 612467  |
| 32 | 6 | 0 | 3. 521300  | 6. 292681  | 8. 960381  |
| 33 | 1 | 0 | 3. 888019  | 6. 465122  | 9. 964277  |
| 34 | 6 | 0 | 3. 650008  | 7. 327077  | 8. 033518  |
| 35 | 6 | 0 | 6. 135626  | 9. 950523  | 0. 593265  |
| 36 | 6 | 0 | 5. 828314  | 9. 173727  | -0. 533479 |
| 37 | 6 | 0 | 6. 702204  | 9. 057331  | -1. 610406 |
| 38 | 1 | 0 | 6. 394094  | 8. 444866  | -2. 449027 |
| 39 | 6 | 0 | 7. 959207  | 9. 712420  | -1. 619736 |
| 40 | 6 | 0 | 8. 260307  | 10. 504661 | -0. 483785 |
| 41 | 1 | 0 | 9. 187123  | 11. 060900 | -0. 426955 |
| 42 | 6 | 0 | 7. 373312  | 10. 608551 | 0. 586376  |
| 43 | 5 | 0 | 3. 806839  | 10. 777105 | 4. 222262  |
| 44 | 1 | 0 | 2. 172855  | 5. 862210  | 5. 369687  |
| 45 | 1 | 0 | 4. 120773  | 8. 254030  | 8. 352205  |
| 46 | 1 | 0 | 4. 879030  | 8. 646973  | -0. 576173 |
| 47 | 1 | 0 | 7. 652312  | 11. 229418 | 1. 434313  |
| 48 | 1 | 0 | 0. 903679  | 14. 631318 | 4. 672462  |
| 49 | 1 | 0 | -0. 983648 | 11. 661340 | 2. 216695  |
| 50 | 6 | 0 | -4. 474620 | 15. 111979 | 2. 316995  |
| 51 | 1 | 0 | -5. 317548 | 15. 658402 | 2. 753989  |
| 52 | 1 | 0 | -4. 650477 | 14. 055373 | 2. 544906  |
| 53 | 6 | 0 | 1. 773485  | 2. 997383  | 9. 343244  |
| 54 | 1 | 0 | 2. 040972  | 2. 117822  | 9. 931497  |
| 55 | 1 | 0 | 1. 762918  | 2. 657713  | 8. 304880  |
| 56 | 6 | 0 | 10. 092626 | 10. 366518 | -2. 640651 |

|     |   |   |            |            |            |
|-----|---|---|------------|------------|------------|
| 57  | 1 | 0 | 10. 552910 | 10. 213330 | -1. 659282 |
| 58  | 1 | 0 | 9. 866638  | 11. 443611 | -2. 715061 |
| 59  | 6 | 0 | 0. 252859  | 8. 620047  | 7. 219986  |
| 60  | 1 | 0 | -0. 358939 | 9. 235564  | 7. 890843  |
| 61  | 1 | 0 | 0. 978560  | 8. 106708  | 7. 855112  |
| 62  | 6 | 0 | -0. 979577 | 11. 181865 | 5. 961799  |
| 63  | 1 | 0 | -1. 433960 | 11. 607909 | 5. 064383  |
| 64  | 1 | 0 | -1. 626038 | 10. 353995 | 6. 272347  |
| 65  | 6 | 0 | 5. 717889  | 6. 086847  | 4. 915806  |
| 66  | 1 | 0 | 4. 842820  | 5. 571373  | 5. 319321  |
| 67  | 1 | 0 | 6. 141858  | 5. 424854  | 4. 153441  |
| 68  | 6 | 0 | 6. 825524  | 7. 163256  | 2. 207884  |
| 69  | 1 | 0 | 7. 565701  | 6. 654804  | 2. 837906  |
| 70  | 1 | 0 | 7. 383338  | 7. 876532  | 1. 596707  |
| 71  | 6 | 0 | 1. 664624  | 13. 670314 | 0. 614479  |
| 72  | 1 | 0 | 0. 613400  | 13. 549707 | 0. 886344  |
| 73  | 1 | 0 | 1. 722614  | 13. 528440 | -0. 469861 |
| 74  | 6 | 0 | 4. 094084  | 12. 216628 | -0. 680874 |
| 75  | 1 | 0 | 3. 993083  | 13. 278761 | -0. 936305 |
| 76  | 1 | 0 | 5. 158669  | 11. 983996 | -0. 760908 |
| 77  | 6 | 0 | 2. 103959  | 15. 109288 | 0. 947121  |
| 78  | 1 | 0 | 1. 469269  | 15. 835492 | 0. 424587  |
| 79  | 1 | 0 | 2. 030507  | 15. 308259 | 2. 021650  |
| 80  | 1 | 0 | 3. 142593  | 15. 287141 | 0. 644129  |
| 81  | 6 | 0 | 3. 317085  | 11. 387373 | -1. 720636 |
| 82  | 1 | 0 | 3. 390767  | 10. 315646 | -1. 510790 |
| 83  | 1 | 0 | 2. 253391  | 11. 651174 | -1. 728595 |
| 84  | 1 | 0 | 3. 716128  | 11. 562388 | -2. 727356 |
| 85  | 6 | 0 | -0. 977833 | 12. 248529 | 7. 073985  |
| 86  | 1 | 0 | -0. 572663 | 11. 847451 | 8. 010615  |
| 87  | 1 | 0 | -0. 371727 | 13. 116029 | 6. 791913  |
| 88  | 1 | 0 | -1. 998478 | 12. 599360 | 7. 270059  |
| 89  | 6 | 0 | -0. 657439 | 7. 573956  | 6. 549386  |
| 90  | 1 | 0 | -1. 143091 | 6. 946302  | 7. 306857  |
| 91  | 1 | 0 | -1. 443281 | 8. 051478  | 5. 952906  |
| 92  | 1 | 0 | -0. 086793 | 6. 917451  | 5. 884685  |
| 93  | 6 | 0 | 6. 753337  | 6. 267493  | 6. 042146  |
| 94  | 1 | 0 | 6. 358658  | 6. 896503  | 6. 847032  |
| 95  | 1 | 0 | 7. 025085  | 5. 296349  | 6. 473727  |
| 96  | 1 | 0 | 7. 668624  | 6. 739481  | 5. 665855  |
| 97  | 6 | 0 | 6. 163560  | 6. 120257  | 1. 288380  |
| 98  | 1 | 0 | 6. 915066  | 5. 631435  | 0. 656345  |
| 99  | 1 | 0 | 5. 653449  | 5. 343520  | 1. 869365  |
| 100 | 1 | 0 | 5. 421153  | 6. 584626  | 0. 631464  |
| 101 | 7 | 0 | 2. 841333  | 3. 991237  | 9. 510163  |
| 102 | 7 | 0 | -3. 262135 | 15. 561746 | 3. 001058  |
| 103 | 7 | 0 | 8. 859185  | 9. 565079  | -2. 676546 |
| 104 | 6 | 0 | -3. 276056 | 16. 931248 | 3. 515591  |
| 105 | 1 | 0 | -2. 280622 | 17. 373127 | 3. 401682  |
| 106 | 1 | 0 | -3. 940359 | 17. 515484 | 2. 869500  |
| 107 | 6 | 0 | 8. 355849  | 9. 135621  | -3. 986132 |
| 108 | 1 | 0 | 7. 747558  | 8. 236796  | -3. 853323 |
| 109 | 1 | 0 | 9. 210824  | 8. 818111  | -4. 584915 |
| 110 | 6 | 0 | 3. 369214  | 4. 196330  | 10. 867051 |
| 111 | 1 | 0 | 4. 354959  | 4. 659631  | 10. 763183 |
| 112 | 1 | 0 | 2. 746832  | 4. 907036  | 11. 436982 |
| 113 | 6 | 0 | 0. 378802  | 3. 487904  | 9. 750313  |

|     |   |   |           |           |           |
|-----|---|---|-----------|-----------|-----------|
| 114 | 1 | 0 | 0.351845  | 3.777664  | 10.807340 |
| 115 | 1 | 0 | 0.070414  | 4.353791  | 9.153586  |
| 116 | 1 | 0 | -0.361062 | 2.691906  | 9.600980  |
| 117 | 6 | 0 | 3.550179  | 2.917000  | 11.683314 |
| 118 | 1 | 0 | 4.095728  | 3.166487  | 12.600575 |
| 119 | 1 | 0 | 2.602067  | 2.459698  | 11.983628 |
| 120 | 1 | 0 | 4.138642  | 2.172410  | 11.134876 |
| 121 | 6 | 0 | 7.561482  | 10.204227 | -4.746684 |
| 122 | 1 | 0 | 6.680187  | 10.526092 | -4.180878 |
| 123 | 1 | 0 | 8.177641  | 11.088826 | -4.946156 |
| 124 | 1 | 0 | 7.219417  | 9.807855  | -5.710694 |
| 125 | 6 | 0 | 11.134901 | 9.997525  | -3.694736 |
| 126 | 1 | 0 | 10.826633 | 10.256440 | -4.712696 |
| 127 | 1 | 0 | 12.052538 | 10.557001 | -3.480344 |
| 128 | 1 | 0 | 11.379048 | 8.929571  | -3.664086 |
| 129 | 6 | 0 | -4.454629 | 15.334096 | 0.800464  |
| 130 | 1 | 0 | -4.332375 | 16.397270 | 0.561947  |
| 131 | 1 | 0 | -3.634066 | 14.785337 | 0.325611  |
| 132 | 1 | 0 | -5.396862 | 14.993439 | 0.353686  |
| 133 | 6 | 0 | -3.747115 | 17.048160 | 4.969719  |
| 134 | 1 | 0 | -4.765168 | 16.657626 | 5.085110  |
| 135 | 1 | 0 | -3.092671 | 16.491080 | 5.648845  |
| 136 | 1 | 0 | -3.750422 | 18.099107 | 5.284279  |
| 137 | 6 | 0 | 4.730186  | 11.805544 | 5.102210  |
| 138 | 6 | 0 | 4.695641  | 11.823491 | 6.508531  |
| 139 | 6 | 0 | 5.617637  | 12.716979 | 4.499535  |
| 140 | 6 | 0 | 5.502938  | 12.677469 | 7.265036  |
| 141 | 1 | 0 | 4.010656  | 11.162202 | 7.035500  |
| 142 | 6 | 0 | 6.428654  | 13.574570 | 5.246090  |
| 143 | 1 | 0 | 5.670839  | 12.773450 | 3.414280  |
| 144 | 6 | 0 | 6.391937  | 13.567203 | 6.647566  |
| 145 | 1 | 0 | 5.436787  | 12.657569 | 8.351903  |
| 146 | 1 | 0 | 7.095606  | 14.266326 | 4.733264  |
| 147 | 6 | 0 | 7.290297  | 14.472476 | 7.458149  |
| 148 | 1 | 0 | 8.292350  | 14.037762 | 7.580157  |
| 149 | 1 | 0 | 7.421959  | 15.447399 | 6.974302  |
| 150 | 1 | 0 | 6.887314  | 14.643786 | 8.462525  |

---

## 2a

|                                              |                             |
|----------------------------------------------|-----------------------------|
| Zero-point correction=                       | 0.539251 (Hartree/Particle) |
| Thermal correction to Energy=                | 0.570574                    |
| Thermal correction to Enthalpy=              | 0.571519                    |
| Thermal correction to Gibbs Free Energy=     | 0.475296                    |
| Sum of electronic and zero-point Energies=   | -1576.706517                |
| Sum of electronic and thermal Energies=      | -1576.675194                |
| Sum of electronic and thermal Enthalpies=    | -1576.674249                |
| Sum of electronic and thermal Free Energies= | -1576.770472                |

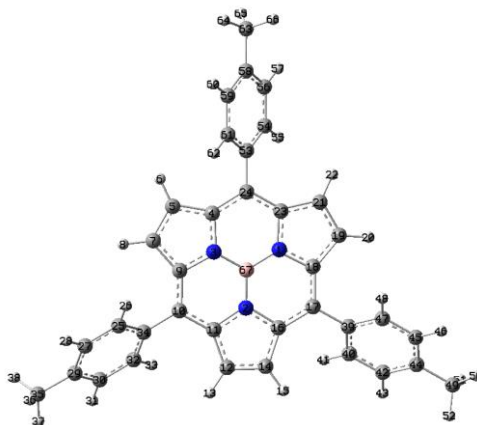

**Fig. S92** Optimized structures of **2a**.

**Table S21** Coordinates of atoms in **2a**.

| Center Number | Atomic Number | Atomic Type | Coordinates (Angstroms) |           |          |
|---------------|---------------|-------------|-------------------------|-----------|----------|
|               |               |             | X                       | Y         | Z        |
| 1             | 7             | 0           | 4.149979                | 9.787943  | 4.218163 |
| 2             | 7             | 0           | 2.137381                | 9.713552  | 5.485353 |
| 3             | 7             | 0           | 3.151949                | 7.692031  | 4.741403 |
| 4             | 6             | 0           | 4.198969                | 6.996036  | 4.178470 |
| 5             | 6             | 0           | 3.883751                | 5.625755  | 4.479322 |
| 6             | 1             | 0           | 4.484381                | 4.768852  | 4.207553 |
| 7             | 6             | 0           | 2.691223                | 5.582190  | 5.197813 |
| 8             | 1             | 0           | 2.217261                | 4.686616  | 5.574366 |
| 9             | 6             | 0           | 2.204551                | 6.922665  | 5.380091 |
| 10            | 6             | 0           | 1.121188                | 7.597155  | 6.041851 |
| 11            | 6             | 0           | 1.087165                | 9.034121  | 6.062034 |
| 12            | 6             | 0           | 0.212197                | 10.088952 | 6.496849 |
| 13            | 1             | 0           | -0.739087               | 9.951594  | 6.991751 |
| 14            | 6             | 0           | 0.777994                | 11.316336 | 6.159516 |
| 15            | 1             | 0           | 0.335264                | 12.284011 | 6.349994 |
| 16            | 6             | 0           | 2.034701                | 11.087308 | 5.499575 |
| 17            | 6             | 0           | 3.075315                | 11.848558 | 4.864065 |
| 18            | 6             | 0           | 4.163334                | 11.164922 | 4.220819 |
| 19            | 6             | 0           | 5.377347                | 11.483015 | 3.518761 |
| 20            | 1             | 0           | 5.746730                | 12.479942 | 3.323577 |
| 21            | 6             | 0           | 6.002340                | 10.299373 | 3.133137 |
| 22            | 1             | 0           | 6.928762                | 10.230501 | 2.580410 |
| 23            | 6             | 0           | 5.217592                | 9.184713  | 3.591437 |
| 24            | 6             | 0           | 5.259541                | 7.748666  | 3.566713 |
| 25            | 6             | 0           | -0.502198               | 5.681834  | 6.086884 |
| 26            | 1             | 0           | -0.177658               | 5.396559  | 5.090835 |
| 27            | 6             | 0           | -1.498588               | 4.944449  | 6.719953 |
| 28            | 1             | 0           | -1.923348               | 4.080559  | 6.214377 |
| 29            | 6             | 0           | -1.972398               | 5.300394  | 7.991919 |
| 30            | 6             | 0           | -1.416974               | 6.432962  | 8.604628 |
| 31            | 1             | 0           | -1.762141               | 6.730778  | 9.591877 |
| 32            | 6             | 0           | -0.421695               | 7.179315  | 7.978493 |
| 33            | 1             | 0           | 0.007718                | 8.033316  | 8.493365 |
| 34            | 6             | 0           | 0.057043                | 6.815420  | 6.706328 |
| 35            | 6             | 0           | -3.025830               | 4.473713  | 8.685853 |

|    |   |   |           |           |          |
|----|---|---|-----------|-----------|----------|
| 36 | 1 | 0 | -3.750517 | 4.067699  | 7.971642 |
| 37 | 1 | 0 | -3.568946 | 5.060787  | 9.433493 |
| 38 | 1 | 0 | -2.572759 | 3.619186  | 9.207049 |
| 39 | 6 | 0 | 3.020318  | 13.326148 | 4.863454 |
| 40 | 6 | 0 | 2.692154  | 14.037942 | 6.033536 |
| 41 | 1 | 0 | 2.506533  | 13.499159 | 6.957891 |
| 42 | 6 | 0 | 2.638773  | 15.427945 | 6.028207 |
| 43 | 1 | 0 | 2.394278  | 15.954117 | 6.948137 |
| 44 | 6 | 0 | 2.906398  | 16.163424 | 4.862313 |
| 45 | 6 | 0 | 3.230907  | 15.452257 | 3.699366 |
| 46 | 1 | 0 | 3.431889  | 15.995654 | 2.779324 |
| 47 | 6 | 0 | 3.290296  | 14.059693 | 3.694836 |
| 48 | 1 | 0 | 3.516314  | 13.537799 | 2.769782 |
| 49 | 6 | 0 | 2.844098  | 17.670295 | 4.870425 |
| 50 | 1 | 0 | 3.071596  | 18.084973 | 3.883684 |
| 51 | 1 | 0 | 3.559083  | 18.092853 | 5.587719 |
| 52 | 1 | 0 | 1.849082  | 18.025469 | 5.166515 |
| 53 | 6 | 0 | 6.387396  | 7.044807  | 2.919790 |
| 54 | 6 | 0 | 7.718367  | 7.446450  | 3.140486 |
| 55 | 1 | 0 | 7.928491  | 8.266245  | 3.820798 |
| 56 | 6 | 0 | 8.773383  | 6.775101  | 2.529637 |
| 57 | 1 | 0 | 9.793535  | 7.095447  | 2.728162 |
| 58 | 6 | 0 | 8.546752  | 5.684550  | 1.675169 |
| 59 | 6 | 0 | 7.220109  | 5.287751  | 1.457569 |
| 60 | 1 | 0 | 7.013732  | 4.449518  | 0.796626 |
| 61 | 6 | 0 | 6.156994  | 5.951025  | 2.066865 |
| 62 | 1 | 0 | 5.139145  | 5.635670  | 1.857996 |
| 63 | 6 | 0 | 9.696244  | 4.975067  | 1.003749 |
| 64 | 1 | 0 | 9.392990  | 3.995422  | 0.620828 |
| 65 | 1 | 0 | 10.533796 | 4.829761  | 1.695438 |
| 66 | 1 | 0 | 10.078203 | 5.558191  | 0.155003 |
| 67 | 5 | 0 | 3.143609  | 9.064487  | 4.810978 |

---

## 2b

|                                              |                             |
|----------------------------------------------|-----------------------------|
| Zero-point correction=                       | 0.554449 (Hartree/Particle) |
| Thermal correction to Energy=                | 0.588340                    |
| Thermal correction to Enthalpy=              | 0.589284                    |
| Thermal correction to Gibbs Free Energy=     | 0.486792                    |
| Sum of electronic and zero-point Energies=   | -1802.309264                |
| Sum of electronic and thermal Energies=      | -1802.275374                |
| Sum of electronic and thermal Enthalpies=    | -1802.274430                |
| Sum of electronic and thermal Free Energies= | -1802.376921                |

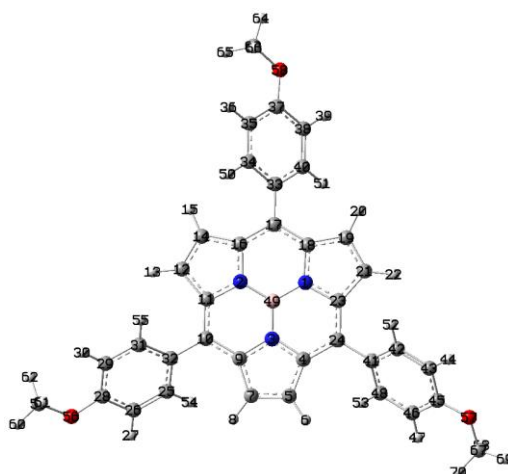

Fig. S93 Optimized structures of **2b**.

Table S22 Coordinates of atoms in **2b**.

| Center Number | Atomic Number | Atomic Type | Coordinates (Angstroms) |           |          |
|---------------|---------------|-------------|-------------------------|-----------|----------|
|               |               |             | X                       | Y         | Z        |
| 1             | 7             | 0           | 4.350582                | 9.838028  | 4.109260 |
| 2             | 7             | 0           | 2.379939                | 9.690436  | 5.434559 |
| 3             | 7             | 0           | 3.374114                | 7.712610  | 4.552929 |
| 4             | 6             | 0           | 4.419050                | 7.050749  | 3.945021 |
| 5             | 6             | 0           | 4.134227                | 5.667956  | 4.212200 |
| 6             | 1             | 0           | 4.742826                | 4.829969  | 3.901889 |
| 7             | 6             | 0           | 2.962385                | 5.582437  | 4.961650 |
| 8             | 1             | 0           | 2.516423                | 4.667478  | 5.325780 |
| 9             | 6             | 0           | 2.460286                | 6.907498  | 5.198280 |
| 10            | 6             | 0           | 1.393795                | 7.541835  | 5.925768 |
| 11            | 6             | 0           | 1.350706                | 8.977494  | 6.009394 |
| 12            | 6             | 0           | 0.479513                | 10.003572 | 6.511425 |
| 13            | 1             | 0           | -0.458287               | 9.837293  | 7.023021 |
| 14            | 6             | 0           | 1.026701                | 11.250189 | 6.212818 |
| 15            | 1             | 0           | 0.579138                | 12.203846 | 6.455394 |
| 16            | 6             | 0           | 2.267222                | 11.061708 | 5.512603 |
| 17            | 6             | 0           | 3.284164                | 11.861273 | 4.882536 |
| 18            | 6             | 0           | 4.358840                | 11.213798 | 4.179340 |
| 19            | 6             | 0           | 5.552792                | 11.571561 | 3.463037 |
| 20            | 1             | 0           | 5.914063                | 12.578063 | 3.305414 |
| 21            | 6             | 0           | 6.172926                | 10.410935 | 3.004698 |
| 22            | 1             | 0           | 7.085504                | 10.374824 | 2.426366 |
| 23            | 6             | 0           | 5.406511                | 9.271659  | 3.429341 |
| 24            | 6             | 0           | 5.461951                | 7.837330  | 3.343421 |
| 25            | 6             | 0           | -0.197375               | 5.594700  | 5.963623 |
| 26            | 6             | 0           | -1.160982               | 4.825857  | 6.597042 |
| 27            | 1             | 0           | -1.599953               | 3.964530  | 6.102752 |
| 28            | 6             | 0           | -1.597532               | 5.158215  | 7.891983 |
| 29            | 6             | 0           | -1.050861               | 6.277836  | 8.536496 |
| 30            | 1             | 0           | -1.357101               | 6.549275  | 9.539835 |
| 31            | 6             | 0           | -0.086446               | 7.045660  | 7.887517 |
| 32            | 6             | 0           | 0.363248                | 6.726326  | 6.594372 |
| 33            | 6             | 0           | 3.216967                | 13.333818 | 4.943569 |

|    |   |   |           |           |           |
|----|---|---|-----------|-----------|-----------|
| 34 | 6 | 0 | 2.882250  | 14.000442 | 6.134664  |
| 35 | 6 | 0 | 2.811068  | 15.390939 | 6.198498  |
| 36 | 1 | 0 | 2.561396  | 15.866719 | 7.139620  |
| 37 | 6 | 0 | 3.075417  | 16.154390 | 5.051749  |
| 38 | 6 | 0 | 3.411959  | 15.503305 | 3.851821  |
| 39 | 1 | 0 | 3.602211  | 16.103023 | 2.966873  |
| 40 | 6 | 0 | 3.482980  | 14.120334 | 3.801895  |
| 41 | 6 | 0 | 6.588365  | 7.171835  | 2.660272  |
| 42 | 6 | 0 | 7.920310  | 7.587170  | 2.872874  |
| 43 | 6 | 0 | 8.976270  | 6.962066  | 2.228533  |
| 44 | 1 | 0 | 10.000862 | 7.275242  | 2.405217  |
| 45 | 6 | 0 | 8.737183  | 5.898748  | 1.339960  |
| 46 | 6 | 0 | 7.420320  | 5.470329  | 1.116698  |
| 47 | 1 | 0 | 7.206032  | 4.659207  | 0.430371  |
| 48 | 6 | 0 | 6.367154  | 6.103629  | 1.774593  |
| 49 | 5 | 0 | 3.363086  | 9.080481  | 4.691870  |
| 50 | 1 | 0 | 2.702022  | 13.428166 | 7.039640  |
| 51 | 1 | 0 | 3.713889  | 13.637839 | 2.857242  |
| 52 | 1 | 0 | 8.130325  | 8.386696  | 3.576714  |
| 53 | 1 | 0 | 5.351959  | 5.778511  | 1.567990  |
| 54 | 1 | 0 | 0.104998  | 5.335528  | 4.953622  |
| 55 | 1 | 0 | 0.347441  | 7.889794  | 8.414299  |
| 56 | 8 | 0 | -2.537940 | 4.343008  | 8.427684  |
| 57 | 8 | 0 | 9.834136  | 5.358996  | 0.754996  |
| 58 | 8 | 0 | 3.031857  | 17.507698 | 4.997515  |
| 59 | 6 | 0 | -3.033205 | 4.636377  | 9.736337  |
| 60 | 1 | 0 | -3.766104 | 3.858020  | 9.955567  |
| 61 | 1 | 0 | -2.231578 | 4.601458  | 10.483451 |
| 62 | 1 | 0 | -3.522989 | 5.616725  | 9.766545  |
| 63 | 6 | 0 | 2.672164  | 18.229791 | 6.177538  |
| 64 | 1 | 0 | 2.689202  | 19.283969 | 5.895291  |
| 65 | 1 | 0 | 1.665056  | 17.960383 | 6.516791  |
| 66 | 1 | 0 | 3.392230  | 18.058562 | 6.986420  |
| 67 | 6 | 0 | 9.657958  | 4.274327  | -0.158748 |
| 68 | 1 | 0 | 9.054228  | 4.575304  | -1.023248 |
| 69 | 1 | 0 | 10.660936 | 4.004399  | -0.493980 |
| 70 | 1 | 0 | 9.194664  | 3.410673  | 0.332652  |

## 2c

|                                              |                             |
|----------------------------------------------|-----------------------------|
| Zero-point correction=                       | 1.192341 (Hartree/Particle) |
| Thermal correction to Energy=                | 1.254843                    |
| Thermal correction to Enthalpy=              | 1.255788                    |
| Thermal correction to Gibbs Free Energy=     | 1.087021                    |
| Sum of electronic and zero-point Energies=   | -2567.692200                |
| Sum of electronic and thermal Energies=      | -2567.629698                |
| Sum of electronic and thermal Enthalpies=    | -2567.628754                |
| Sum of electronic and thermal Free Energies= | -2567.797521                |



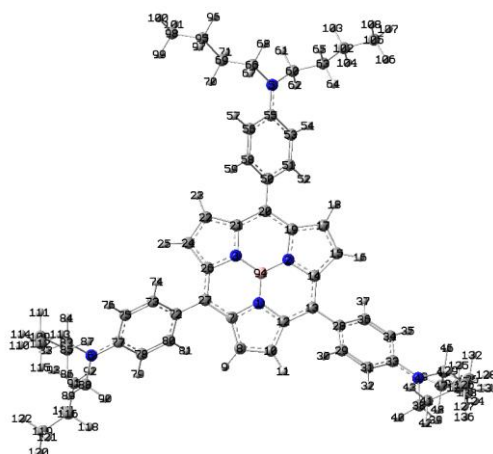

Fig. S94 Optimized structures of **2c**.

Table S23 Coordinates of atoms in **2c**.

| Center Number | Atomic Number | Atomic Type | Coordinates (Angstroms) |           |           |
|---------------|---------------|-------------|-------------------------|-----------|-----------|
|               |               |             | X                       | Y         | Z         |
| 1             | 7             | 0           | 23.360740               | 13.958357 | 4.042399  |
| 2             | 7             | 0           | 24.500477               | 15.611770 | 5.324268  |
| 3             | 7             | 0           | 22.121491               | 15.469827 | 5.403658  |
| 4             | 7             | 0           | 30.811432               | 11.738456 | 2.521565  |
| 5             | 7             | 0           | 23.028525               | 21.672114 | 10.215835 |
| 6             | 7             | 0           | 16.074502               | 11.549823 | 2.120510  |
| 7             | 6             | 0           | 22.212757               | 13.356995 | 3.570211  |
| 8             | 6             | 0           | 22.714088               | 12.302783 | 2.736386  |
| 9             | 1             | 0           | 22.112106               | 11.590522 | 2.189821  |
| 10            | 6             | 0           | 24.108972               | 12.339323 | 2.745094  |
| 11            | 1             | 0           | 24.753128               | 11.669287 | 2.193591  |
| 12            | 6             | 0           | 24.544590               | 13.401702 | 3.605402  |
| 13            | 6             | 0           | 25.779721               | 13.961910 | 4.093770  |
| 14            | 6             | 0           | 25.733555               | 15.085704 | 4.996610  |
| 15            | 6             | 0           | 26.641167               | 15.845245 | 5.805917  |
| 16            | 1             | 0           | 27.713209               | 15.712780 | 5.843703  |
| 17            | 6             | 0           | 25.914567               | 16.762753 | 6.566457  |
| 18            | 1             | 0           | 26.336984               | 17.451075 | 7.284850  |
| 19            | 6             | 0           | 24.519752               | 16.618093 | 6.268166  |
| 20            | 6             | 0           | 23.258466               | 17.157762 | 6.716087  |
| 21            | 6             | 0           | 22.032826               | 16.574187 | 6.225885  |
| 22            | 6             | 0           | 20.622576               | 16.826595 | 6.286315  |
| 23            | 1             | 0           | 20.149267               | 17.634765 | 6.825851  |
| 24            | 6             | 0           | 19.955729               | 15.876896 | 5.510279  |
| 25            | 1             | 0           | 18.886703               | 15.835222 | 5.355741  |
| 26            | 6             | 0           | 20.918718               | 14.988283 | 4.929237  |
| 27            | 6             | 0           | 20.942651               | 13.882031 | 4.004546  |
| 28            | 6             | 0           | 27.070274               | 13.389462 | 3.692360  |
| 29            | 6             | 0           | 27.261788               | 11.997774 | 3.568589  |
| 30            | 1             | 0           | 26.448873               | 11.321640 | 3.814942  |
| 31            | 6             | 0           | 28.478939               | 11.452818 | 3.193285  |
| 32            | 1             | 0           | 28.562177               | 10.374262 | 3.152017  |
| 33            | 6             | 0           | 29.602630               | 12.273788 | 2.898656  |
| 34            | 6             | 0           | 29.405018               | 13.677225 | 3.019270  |
| 35            | 1             | 0           | 30.205862               | 14.365873 | 2.781176  |

|    |   |   |            |            |            |
|----|---|---|------------|------------|------------|
| 36 | 6 | 0 | 28. 185200 | 14. 205674 | 3. 409300  |
| 37 | 1 | 0 | 28. 081216 | 15. 285868 | 3. 451684  |
| 38 | 6 | 0 | 30. 965388 | 10. 300632 | 2. 264770  |
| 39 | 1 | 0 | 31. 794654 | 10. 189726 | 1. 558559  |
| 40 | 1 | 0 | 30. 074619 | 9. 926561  | 1. 747816  |
| 41 | 6 | 0 | 31. 242294 | 9. 439803  | 3. 510243  |
| 42 | 1 | 0 | 31. 264815 | 8. 391463  | 3. 178902  |
| 43 | 1 | 0 | 30. 402553 | 9. 523696  | 4. 212494  |
| 44 | 6 | 0 | 31. 958461 | 12. 591721 | 2. 191479  |
| 45 | 1 | 0 | 32. 861562 | 11. 997172 | 2. 356966  |
| 46 | 1 | 0 | 32. 009527 | 13. 422769 | 2. 902628  |
| 47 | 6 | 0 | 31. 952327 | 13. 118952 | 0. 747731  |
| 48 | 1 | 0 | 31. 906285 | 12. 264761 | 0. 057805  |
| 49 | 1 | 0 | 31. 041643 | 13. 707783 | 0. 576004  |
| 50 | 6 | 0 | 23. 220524 | 18. 294645 | 7. 639990  |
| 51 | 6 | 0 | 24. 152197 | 19. 351452 | 7. 551922  |
| 52 | 1 | 0 | 24. 913910 | 19. 331032 | 6. 778425  |
| 53 | 6 | 0 | 24. 104078 | 20. 448639 | 8. 395021  |
| 54 | 1 | 0 | 24. 850700 | 21. 222691 | 8. 268720  |
| 55 | 6 | 0 | 23. 101195 | 20. 573572 | 9. 396142  |
| 56 | 6 | 0 | 22. 176496 | 19. 497050 | 9. 498489  |
| 57 | 1 | 0 | 21. 396382 | 19. 515442 | 10. 249426 |
| 58 | 6 | 0 | 22. 238645 | 18. 406314 | 8. 647659  |
| 59 | 1 | 0 | 21. 522584 | 17. 602753 | 8. 790428  |
| 60 | 6 | 0 | 23. 918297 | 22. 825983 | 10. 051877 |
| 61 | 1 | 0 | 23. 364822 | 23. 709911 | 10. 386941 |
| 62 | 1 | 0 | 24. 123034 | 22. 983166 | 8. 987947  |
| 63 | 6 | 0 | 25. 231557 | 22. 715604 | 10. 840528 |
| 64 | 1 | 0 | 25. 777748 | 21. 819663 | 10. 516582 |
| 65 | 1 | 0 | 24. 996129 | 22. 570817 | 11. 904062 |
| 66 | 6 | 0 | 22. 034598 | 21. 775891 | 11. 289073 |
| 67 | 1 | 0 | 21. 905278 | 20. 798538 | 11. 765646 |
| 68 | 1 | 0 | 22. 457590 | 22. 432861 | 12. 056331 |
| 69 | 6 | 0 | 20. 677772 | 22. 331800 | 10. 829739 |
| 70 | 1 | 0 | 20. 261283 | 21. 678867 | 10. 051307 |
| 71 | 1 | 0 | 20. 834738 | 23. 314060 | 10. 362819 |
| 72 | 6 | 0 | 19. 687368 | 13. 304661 | 3. 511588  |
| 73 | 6 | 0 | 18. 576559 | 13. 120329 | 4. 361615  |
| 74 | 1 | 0 | 18. 656740 | 13. 386995 | 5. 411435  |
| 75 | 6 | 0 | 17. 395634 | 12. 549955 | 3. 915876  |
| 76 | 1 | 0 | 16. 598492 | 12. 399428 | 4. 633263  |
| 77 | 6 | 0 | 17. 236648 | 12. 129329 | 2. 566563  |
| 78 | 6 | 0 | 18. 349348 | 12. 339246 | 1. 705217  |
| 79 | 1 | 0 | 18. 283815 | 12. 085755 | 0. 654252  |
| 80 | 6 | 0 | 19. 529345 | 12. 895557 | 2. 171029  |
| 81 | 1 | 0 | 20. 336806 | 13. 056885 | 1. 463121  |
| 82 | 6 | 0 | 14. 896114 | 11. 407991 | 2. 981300  |
| 83 | 1 | 0 | 14. 017684 | 11. 408048 | 2. 326723  |
| 84 | 1 | 0 | 14. 799885 | 12. 294329 | 3. 617081  |
| 85 | 6 | 0 | 14. 896665 | 10. 131264 | 3. 836932  |
| 86 | 1 | 0 | 15. 008995 | 9. 259717  | 3. 177027  |
| 87 | 1 | 0 | 15. 771969 | 10. 135338 | 4. 499814  |
| 88 | 6 | 0 | 15. 952126 | 10. 998793 | 0. 767033  |
| 89 | 1 | 0 | 15. 238752 | 10. 171437 | 0. 823765  |
| 90 | 1 | 0 | 16. 907107 | 10. 556119 | 0. 464804  |
| 91 | 6 | 0 | 15. 485622 | 12. 027075 | -0. 276670 |
| 92 | 1 | 0 | 16. 186915 | 12. 871009 | -0. 279050 |

|     |   |   |           |           |           |
|-----|---|---|-----------|-----------|-----------|
| 93  | 1 | 0 | 14.511817 | 12.431329 | 0.033659  |
| 94  | 5 | 0 | 23.327322 | 15.017820 | 4.918779  |
| 95  | 6 | 0 | 19.676434 | 22.462879 | 11.984046 |
| 96  | 1 | 0 | 20.097398 | 23.120362 | 12.758045 |
| 97  | 1 | 0 | 19.537569 | 21.480777 | 12.458499 |
| 98  | 6 | 0 | 18.317393 | 23.008521 | 11.536636 |
| 99  | 1 | 0 | 17.854624 | 22.355596 | 10.785796 |
| 100 | 1 | 0 | 17.622612 | 23.088142 | 12.381319 |
| 101 | 1 | 0 | 18.416471 | 24.006776 | 11.091821 |
| 102 | 6 | 0 | 26.120758 | 23.954254 | 10.673136 |
| 103 | 1 | 0 | 25.555985 | 24.849728 | 10.969644 |
| 104 | 1 | 0 | 26.365630 | 24.085194 | 9.609446  |
| 105 | 6 | 0 | 27.415349 | 23.878399 | 11.487251 |
| 106 | 1 | 0 | 28.018809 | 23.008666 | 11.197695 |
| 107 | 1 | 0 | 28.030227 | 24.774144 | 11.338866 |
| 108 | 1 | 0 | 27.205439 | 23.793080 | 12.560930 |
| 109 | 6 | 0 | 13.617978 | 9.983281  | 4.671360  |
| 110 | 1 | 0 | 12.747379 | 9.960760  | 4.000584  |
| 111 | 1 | 0 | 13.492356 | 10.871401 | 5.307172  |
| 112 | 6 | 0 | 13.618483 | 8.727697  | 5.548022  |
| 113 | 1 | 0 | 14.450094 | 8.742506  | 6.263969  |
| 114 | 1 | 0 | 12.687896 | 8.642659  | 6.121901  |
| 115 | 1 | 0 | 13.719054 | 7.818372  | 4.941979  |
| 116 | 6 | 0 | 15.376389 | 11.456390 | -1.700366 |
| 117 | 1 | 0 | 15.168595 | 12.286467 | -2.388560 |
| 118 | 1 | 0 | 16.350995 | 11.046795 | -2.003148 |
| 119 | 6 | 0 | 14.295368 | 10.383885 | -1.876695 |
| 120 | 1 | 0 | 14.224792 | 10.069387 | -2.924864 |
| 121 | 1 | 0 | 14.501263 | 9.486541  | -1.281354 |
| 122 | 1 | 0 | 13.309617 | 10.762815 | -1.577205 |
| 123 | 6 | 0 | 32.548514 | 9.767774  | 4.244151  |
| 124 | 1 | 0 | 33.390681 | 9.692829  | 3.541399  |
| 125 | 1 | 0 | 32.523125 | 10.809632 | 4.590116  |
| 126 | 6 | 0 | 32.801660 | 8.844104  | 5.439641  |
| 127 | 1 | 0 | 32.871157 | 7.795060  | 5.124635  |
| 128 | 1 | 0 | 33.737435 | 9.100342  | 5.950760  |
| 129 | 1 | 0 | 31.991171 | 8.914824  | 6.176381  |
| 130 | 6 | 0 | 33.188308 | 13.970905 | 0.432313  |
| 131 | 1 | 0 | 34.095081 | 13.376266 | 0.613406  |
| 132 | 1 | 0 | 33.234143 | 14.818407 | 1.131159  |
| 133 | 6 | 0 | 33.204511 | 14.497512 | -1.005633 |
| 134 | 1 | 0 | 32.328361 | 15.126050 | -1.209608 |
| 135 | 1 | 0 | 34.099014 | 15.102207 | -1.197297 |
| 136 | 1 | 0 | 33.198005 | 13.674665 | -1.731715 |

## 2d

|                                            |                             |
|--------------------------------------------|-----------------------------|
| Zero-point correction=                     | 1.187995 (Hartree/Particle) |
| Thermal correction to Energy=              | 1.252827                    |
| Thermal correction to Enthalpy=            | 1.253771                    |
| Thermal correction to Gibbs Free Energy=   | 1.082339                    |
| Sum of electronic and zero-point Energies= | -2567.686803                |
| Sum of electronic and thermal Energies=    | -2567.621971                |
| Sum of electronic and thermal Enthalpies=  | -2567.621027                |

Sum of electronic and thermal Free Energies= -2567.792459

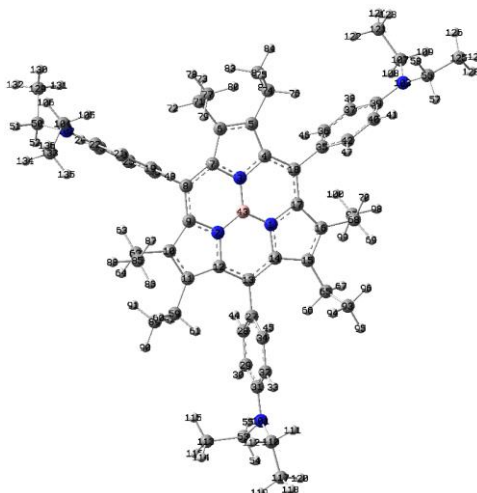

Fig. S95 Optimized structures of **2d**.

Table S24 Coordinates of atoms in **2d**.

| Center Number | Atomic Number | Atomic Type | Coordinates (Angstroms) |           |          |
|---------------|---------------|-------------|-------------------------|-----------|----------|
|               |               |             | X                       | Y         | Z        |
| 1             | 7             | 0           | 3.934214                | 8.945429  | 3.493681 |
| 2             | 7             | 0           | 2.021571                | 9.982361  | 4.464114 |
| 3             | 7             | 0           | 2.946779                | 10.842184 | 2.444230 |
| 4             | 6             | 0           | 3.886542                | 10.842063 | 1.436968 |
| 5             | 6             | 0           | 3.507424                | 11.974243 | 0.615775 |
| 6             | 6             | 0           | 2.370679                | 12.578947 | 1.183415 |
| 7             | 6             | 0           | 2.002708                | 11.842801 | 2.375731 |
| 8             | 6             | 0           | 1.004773                | 11.888350 | 3.405001 |
| 9             | 6             | 0           | 1.023044                | 10.931633 | 4.473131 |
| 10            | 6             | 0           | 0.243512                | 10.595650 | 5.647088 |
| 11            | 6             | 0           | 0.816915                | 9.465504  | 6.258608 |
| 12            | 6             | 0           | 1.979325                | 9.064944  | 5.491061 |
| 13            | 6             | 0           | 2.998907                | 8.055797  | 5.523209 |
| 14            | 6             | 0           | 4.001463                | 8.005318  | 4.498579 |
| 15            | 6             | 0           | 5.166369                | 7.216237  | 4.150067 |
| 16            | 6             | 0           | 5.719629                | 7.732838  | 2.964061 |
| 17            | 6             | 0           | 4.921112                | 8.863679  | 2.535958 |
| 18            | 6             | 0           | 4.906395                | 9.834627  | 1.480725 |
| 19            | 6             | 0           | 0.035970                | 14.156348 | 3.982417 |
| 20            | 6             | 0           | -0.973908               | 15.111397 | 3.913165 |
| 21            | 1             | 0           | -0.833164               | 16.044243 | 4.445938 |
| 22            | 6             | 0           | -2.169192               | 14.872019 | 3.186679 |
| 23            | 6             | 0           | -2.277633               | 13.610851 | 2.543334 |
| 24            | 1             | 0           | -3.155992               | 13.367559 | 1.957862 |
| 25            | 6             | 0           | -1.259647               | 12.667126 | 2.624514 |
| 26            | 6             | 0           | -0.078847               | 12.914635 | 3.341395 |
| 27            | 6             | 0           | 3.012545                | 7.049984  | 6.627553 |
| 28            | 6             | 0           | 2.413103                | 5.790354  | 6.474901 |
| 29            | 6             | 0           | 2.408896                | 4.854339  | 7.502882 |
| 30            | 1             | 0           | 1.919366                | 3.905943  | 7.320865 |
| 31            | 6             | 0           | 3.027570                | 5.119449  | 8.752710 |
| 32            | 6             | 0           | 3.612880                | 6.403214  | 8.902794 |

|    |   |   |            |            |            |
|----|---|---|------------|------------|------------|
| 33 | 1 | 0 | 4. 072937  | 6. 695932  | 9. 837575  |
| 34 | 6 | 0 | 3. 607155  | 7. 331544  | 7. 864279  |
| 35 | 6 | 0 | 5. 981634  | 9. 823519  | 0. 443793  |
| 36 | 6 | 0 | 5. 835098  | 9. 136220  | -0. 769849 |
| 37 | 6 | 0 | 6. 835245  | 9. 139769  | -1. 736595 |
| 38 | 1 | 0 | 6. 652587  | 8. 592702  | -2. 653092 |
| 39 | 6 | 0 | 8. 058942  | 9. 830520  | -1. 537980 |
| 40 | 6 | 0 | 8. 188939  | 10. 536410 | -0. 313694 |
| 41 | 1 | 0 | 9. 077369  | 11. 116240 | -0. 100769 |
| 42 | 6 | 0 | 7. 179695  | 10. 522078 | 0. 645167  |
| 43 | 5 | 0 | 2. 966935  | 9. 922710  | 3. 466976  |
| 44 | 1 | 0 | 1. 934160  | 5. 534075  | 5. 533058  |
| 45 | 1 | 0 | 4. 067384  | 8. 302509  | 8. 030378  |
| 46 | 1 | 0 | 4. 918546  | 8. 587004  | -0. 970171 |
| 47 | 1 | 0 | 7. 328876  | 11. 078594 | 1. 567355  |
| 48 | 1 | 0 | 0. 931961  | 14. 385421 | 4. 553829  |
| 49 | 1 | 0 | -1. 386199 | 11. 717820 | 2. 109616  |
| 50 | 6 | 0 | -4. 468406 | 15. 513657 | 2. 491212  |
| 51 | 1 | 0 | -5. 217133 | 16. 139366 | 2. 989077  |
| 52 | 1 | 0 | -4. 745220 | 14. 477993 | 2. 713603  |
| 53 | 6 | 0 | 2. 142402  | 3. 036120  | 9. 739484  |
| 54 | 1 | 0 | 2. 527055  | 2. 270228  | 10. 414174 |
| 55 | 1 | 0 | 2. 162301  | 2. 581284  | 8. 745568  |
| 56 | 6 | 0 | 10. 270401 | 10. 636152 | -2. 230717 |
| 57 | 1 | 0 | 10. 616535 | 10. 418518 | -1. 215209 |
| 58 | 1 | 0 | 10. 006822 | 11. 706483 | -2. 250099 |
| 59 | 6 | 0 | 0. 249286  | 8. 775539  | 7. 470754  |
| 60 | 1 | 0 | -0. 206553 | 9. 524709  | 8. 127121  |
| 61 | 1 | 0 | 1. 053430  | 8. 306092  | 8. 042685  |
| 62 | 6 | 0 | -0. 955883 | 11. 336318 | 6. 177210  |
| 63 | 1 | 0 | -1. 489369 | 11. 814796 | 5. 351916  |
| 64 | 1 | 0 | -1. 650398 | 10. 617325 | 6. 625631  |
| 65 | 6 | 0 | 5. 743417  | 6. 062365  | 4. 927033  |
| 66 | 1 | 0 | 4. 942832  | 5. 525113  | 5. 441679  |
| 67 | 1 | 0 | 6. 195864  | 5. 352475  | 4. 226134  |
| 68 | 6 | 0 | 6. 914857  | 7. 152965  | 2. 255007  |
| 69 | 1 | 0 | 7. 613169  | 6. 754045  | 2. 998814  |
| 70 | 1 | 0 | 7. 446565  | 7. 943909  | 1. 720135  |
| 71 | 6 | 0 | 1. 708989  | 13. 822413 | 0. 651290  |
| 72 | 1 | 0 | 0. 647264  | 13. 816435 | 0. 910582  |
| 73 | 1 | 0 | 1. 764397  | 13. 817473 | -0. 442753 |
| 74 | 6 | 0 | 4. 171791  | 12. 431044 | -0. 656504 |
| 75 | 1 | 0 | 4. 125135  | 13. 524451 | -0. 710063 |
| 76 | 1 | 0 | 5. 231542  | 12. 164045 | -0. 635834 |
| 77 | 6 | 0 | 2. 351410  | 15. 119313 | 1. 179193  |
| 78 | 1 | 0 | 1. 841784  | 15. 993194 | 0. 757238  |
| 79 | 1 | 0 | 2. 280630  | 15. 181363 | 2. 270239  |
| 80 | 1 | 0 | 3. 410890  | 15. 178994 | 0. 905919  |
| 81 | 6 | 0 | 3. 526257  | 11. 842411 | -1. 925296 |
| 82 | 1 | 0 | 3. 579481  | 10. 748646 | -1. 927614 |
| 83 | 1 | 0 | 2. 471576  | 12. 128517 | -2. 005583 |
| 84 | 1 | 0 | 4. 046032  | 12. 208198 | -2. 818387 |
| 85 | 6 | 0 | -0. 591700 | 12. 399921 | 7. 230452  |
| 86 | 1 | 0 | -0. 084005 | 11. 950195 | 8. 091333  |
| 87 | 1 | 0 | 0. 070772  | 13. 164220 | 6. 810870  |
| 88 | 1 | 0 | -1. 497275 | 12. 899823 | 7. 592926  |
| 89 | 6 | 0 | -0. 808182 | 7. 711883  | 7. 117791  |

|     |   |   |           |           |           |
|-----|---|---|-----------|-----------|-----------|
| 90  | 1 | 0 | -1.204332 | 7.254359  | 8.031739  |
| 91  | 1 | 0 | -1.647507 | 8.150966  | 6.566614  |
| 92  | 1 | 0 | -0.379486 | 6.915379  | 6.500790  |
| 93  | 6 | 0 | 6.805331  | 6.493154  | 5.956347  |
| 94  | 1 | 0 | 6.379923  | 7.166865  | 6.707644  |
| 95  | 1 | 0 | 7.204097  | 5.615335  | 6.477720  |
| 96  | 1 | 0 | 7.642156  | 7.010674  | 5.473431  |
| 97  | 6 | 0 | 6.545569  | 6.033117  | 1.263648  |
| 98  | 1 | 0 | 7.448539  | 5.642112  | 0.780798  |
| 99  | 1 | 0 | 6.043851  | 5.201084  | 1.770647  |
| 100 | 1 | 0 | 5.876660  | 6.402604  | 0.479245  |
| 101 | 7 | 0 | 3.077049  | 4.167206  | 9.764007  |
| 102 | 7 | 0 | -3.174590 | 15.813394 | 3.107793  |
| 103 | 7 | 0 | 9.081949  | 9.802558  | -2.478970 |
| 104 | 6 | 0 | -3.010721 | 17.167353 | 3.639830  |
| 105 | 1 | 0 | -1.975956 | 17.492240 | 3.492070  |
| 106 | 1 | 0 | -3.626771 | 17.834009 | 3.026725  |
| 107 | 6 | 0 | 8.782770  | 9.407679  | -3.859812 |
| 108 | 1 | 0 | 8.217631  | 8.471854  | -3.845536 |
| 109 | 1 | 0 | 9.726206  | 9.164946  | -4.350385 |
| 110 | 6 | 0 | 3.665458  | 4.561191  | 11.054809 |
| 111 | 1 | 0 | 4.633856  | 5.026125  | 10.843793 |
| 112 | 1 | 0 | 3.048620  | 5.330951  | 11.547200 |
| 113 | 6 | 0 | 0.703808  | 3.393400  | 10.130945 |
| 114 | 1 | 0 | 0.658753  | 3.792341  | 11.151109 |
| 115 | 1 | 0 | 0.278615  | 4.143214  | 9.454596  |
| 116 | 1 | 0 | 0.067879  | 2.500686  | 10.089970 |
| 117 | 6 | 0 | 3.912626  | 3.414407  | 12.032283 |
| 118 | 1 | 0 | 4.463280  | 3.812031  | 12.892202 |
| 119 | 1 | 0 | 2.988110  | 2.970324  | 12.414424 |
| 120 | 1 | 0 | 4.521857  | 2.622688  | 11.581936 |
| 121 | 6 | 0 | 8.034158  | 10.467131 | -4.676953 |
| 122 | 1 | 0 | 7.066672  | 10.712349 | -4.225147 |
| 123 | 1 | 0 | 8.616367  | 11.392939 | -4.753892 |
| 124 | 1 | 0 | 7.850055  | 10.099049 | -5.693665 |
| 125 | 6 | 0 | 11.445291 | 10.390947 | -3.174843 |
| 126 | 1 | 0 | 11.243930 | 10.709309 | -4.202449 |
| 127 | 1 | 0 | 12.300219 | 10.973684 | -2.813853 |
| 128 | 1 | 0 | 11.741312 | 9.335974  | -3.186874 |
| 129 | 6 | 0 | -4.514780 | 15.768079 | 0.980572  |
| 130 | 1 | 0 | -4.279339 | 16.814157 | 0.752332  |
| 131 | 1 | 0 | -3.799638 | 15.135671 | 0.443330  |
| 132 | 1 | 0 | -5.517849 | 15.554590 | 0.591674  |
| 133 | 6 | 0 | -3.412265 | 17.309522 | 5.111740  |
| 134 | 1 | 0 | -4.461856 | 17.029547 | 5.259489  |
| 135 | 1 | 0 | -2.798199 | 16.672315 | 5.757427  |
| 136 | 1 | 0 | -3.290022 | 18.348764 | 5.440504  |

**4a**

Zero-point correction= 0.656775 (Hartree/Particle)  
Thermal correction to Energy= 0.694925  
Thermal correction to Enthalpy= 0.695869  
Thermal correction to Gibbs Free Energy= 0.584527  
Sum of electronic and zero-point Energies= -1847.513411

Sum of electronic and thermal Energies= -1847.475260  
 Sum of electronic and thermal Enthalpies= -1847.474316  
 Sum of electronic and thermal Free Energies= -1847.585658

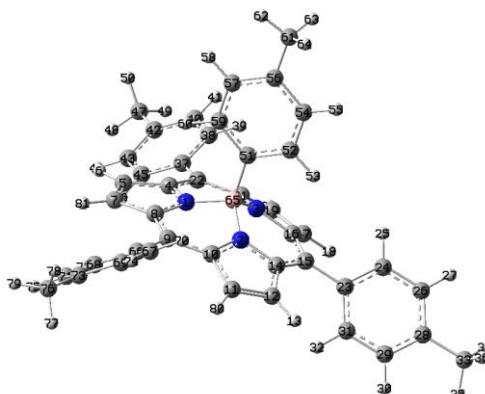

Fig. S96 Optimized structures of 4a.

Table S25 Coordinates of atoms in 4a.

| Center Number | Atomic Number | Atomic Type | Coordinates (Angstroms) |          |           |
|---------------|---------------|-------------|-------------------------|----------|-----------|
|               |               |             | X                       | Y        | Z         |
| 1             | 7             | 0           | 4.392731                | 5.188799 | 3.953921  |
| 2             | 7             | 0           | 4.257026                | 6.671446 | 5.798936  |
| 3             | 7             | 0           | 6.383949                | 5.832974 | 5.096477  |
| 4             | 6             | 0           | 5.040338                | 4.229911 | 3.232413  |
| 5             | 6             | 0           | 4.016267                | 3.518506 | 2.517313  |
| 6             | 1             | 0           | 4.169522                | 2.702554 | 1.826484  |
| 7             | 6             | 0           | 2.791461                | 4.041009 | 2.898825  |
| 8             | 6             | 0           | 3.036532                | 5.083705 | 3.857740  |
| 9             | 6             | 0           | 2.227997                | 5.872043 | 4.753305  |
| 10            | 6             | 0           | 2.896135                | 6.601485 | 5.799453  |
| 11            | 6             | 0           | 2.472964                | 7.101274 | 7.078652  |
| 12            | 6             | 0           | 3.607471                | 7.404803 | 7.810588  |
| 13            | 1             | 0           | 3.629454                | 7.778930 | 8.823305  |
| 14            | 6             | 0           | 4.751123                | 7.068601 | 7.005937  |
| 15            | 6             | 0           | 6.157983                | 6.902328 | 7.259567  |
| 16            | 6             | 0           | 6.940430                | 6.178504 | 6.293065  |
| 17            | 6             | 0           | 8.153496                | 5.416512 | 6.407174  |
| 18            | 1             | 0           | 8.828266                | 5.431310 | 7.251426  |
| 19            | 6             | 0           | 8.238503                | 4.591541 | 5.300261  |
| 20            | 1             | 0           | 8.991887                | 3.839040 | 5.115823  |
| 21            | 6             | 0           | 7.079772                | 4.831744 | 4.485248  |
| 22            | 6             | 0           | 6.454031                | 4.062845 | 3.440041  |
| 23            | 6             | 0           | 6.779035                | 7.317243 | 8.521570  |
| 24            | 6             | 0           | 8.054525                | 7.922732 | 8.509392  |
| 25            | 1             | 0           | 8.556665                | 8.094914 | 7.562397  |
| 26            | 6             | 0           | 8.653871                | 8.341834 | 9.691519  |
| 27            | 1             | 0           | 9.627108                | 8.824519 | 9.652905  |
| 28            | 6             | 0           | 8.024088                | 8.156063 | 10.932643 |
| 29            | 6             | 0           | 6.768115                | 7.526914 | 10.946153 |
| 30            | 1             | 0           | 6.272214                | 7.345133 | 11.896368 |
| 31            | 6             | 0           | 6.149829                | 7.122149 | 9.769593  |

|    |   |   |            |            |            |
|----|---|---|------------|------------|------------|
| 32 | 1 | 0 | 5. 199003  | 6. 603577  | 9. 820437  |
| 33 | 6 | 0 | 8. 663743  | 8. 638650  | 12. 207838 |
| 34 | 1 | 0 | 9. 756382  | 8. 632921  | 12. 136388 |
| 35 | 1 | 0 | 8. 366940  | 8. 023640  | 13. 063758 |
| 36 | 1 | 0 | 8. 357580  | 9. 670971  | 12. 427168 |
| 37 | 6 | 0 | 7. 234947  | 3. 046220  | 2. 730961  |
| 38 | 6 | 0 | 8. 553474  | 3. 337427  | 2. 313886  |
| 39 | 1 | 0 | 8. 966902  | 4. 324025  | 2. 497586  |
| 40 | 6 | 0 | 9. 307885  | 2. 392732  | 1. 630300  |
| 41 | 1 | 0 | 10. 312676 | 2. 648355  | 1. 303139  |
| 42 | 6 | 0 | 8. 794438  | 1. 115233  | 1. 350178  |
| 43 | 6 | 0 | 7. 492826  | 0. 818540  | 1. 785054  |
| 44 | 1 | 0 | 7. 083079  | -0. 171837 | 1. 604599  |
| 45 | 6 | 0 | 6. 721948  | 1. 761340  | 2. 455281  |
| 46 | 1 | 0 | 5. 737715  | 1. 483542  | 2. 815356  |
| 47 | 6 | 0 | 9. 614698  | 0. 104187  | 0. 593058  |
| 48 | 1 | 0 | 9. 212695  | -0. 907143 | 0. 708161  |
| 49 | 1 | 0 | 10. 657657 | 0. 104292  | 0. 929116  |
| 50 | 1 | 0 | 9. 624320  | 0. 336854  | -0. 480577 |
| 51 | 6 | 0 | 5. 242025  | 7. 650793  | 3. 566346  |
| 52 | 6 | 0 | 5. 785559  | 8. 863307  | 4. 029570  |
| 53 | 1 | 0 | 6. 098166  | 8. 953499  | 5. 068264  |
| 54 | 6 | 0 | 5. 933283  | 9. 967991  | 3. 192988  |
| 55 | 1 | 0 | 6. 354792  | 10. 889889 | 3. 589878  |
| 56 | 6 | 0 | 5. 541939  | 9. 912306  | 1. 845348  |
| 57 | 6 | 0 | 5. 000458  | 8. 710715  | 1. 375607  |
| 58 | 1 | 0 | 4. 684941  | 8. 637106  | 0. 336703  |
| 59 | 6 | 0 | 4. 853595  | 7. 604590  | 2. 219462  |
| 60 | 1 | 0 | 4. 422480  | 6. 694478  | 1. 808652  |
| 61 | 6 | 0 | 5. 711154  | 11. 108628 | 0. 939216  |
| 62 | 1 | 0 | 5. 229576  | 10. 946521 | -0. 030705 |
| 63 | 1 | 0 | 6. 772063  | 11. 321368 | 0. 751850  |
| 64 | 1 | 0 | 5. 279371  | 12. 013497 | 1. 384377  |
| 65 | 5 | 0 | 5. 082291  | 6. 379386  | 4. 570714  |
| 66 | 6 | 0 | 0. 763692  | 5. 858156  | 4. 708016  |
| 67 | 6 | 0 | 0. 046658  | 7. 057048  | 4. 918189  |
| 68 | 6 | 0 | 0. 025898  | 4. 681492  | 4. 457620  |
| 69 | 6 | 0 | -1. 341188 | 7. 076610  | 4. 853534  |
| 70 | 1 | 0 | 0. 587843  | 7. 982949  | 5. 085488  |
| 71 | 6 | 0 | -1. 362469 | 4. 710871  | 4. 410021  |
| 72 | 1 | 0 | 0. 540187  | 3. 733575  | 4. 346658  |
| 73 | 6 | 0 | -2. 074925 | 5. 906299  | 4. 601063  |
| 74 | 1 | 0 | -1. 866928 | 8. 017768  | 4. 992933  |
| 75 | 1 | 0 | -1. 907711 | 3. 787978  | 4. 229279  |
| 76 | 6 | 0 | -3. 580395 | 5. 928983  | 4. 564631  |
| 77 | 1 | 0 | -3. 996145 | 5. 792664  | 5. 572602  |
| 78 | 1 | 0 | -3. 956153 | 6. 885711  | 4. 186972  |
| 79 | 1 | 0 | -3. 978776 | 5. 125372  | 3. 936846  |
| 80 | 1 | 0 | 1. 451145  | 7. 167689  | 7. 424203  |
| 81 | 1 | 0 | 1. 825341  | 3. 701400  | 2. 555605  |

**3b**

Zero-point correction= 0.672800 (Hartree/Particle)

Thermal correction to Energy= 0.713659

Thermal correction to Enthalpy= 0.714603



Thermal correction to Gibbs Free Energy= 0.595335  
 Sum of electronic and zero-point Energies= -2073.033228  
 Sum of electronic and thermal Energies= -2072.992369  
 Sum of electronic and thermal Enthalpies= -2072.991425  
 Sum of electronic and thermal Free Energies= -2073.110693

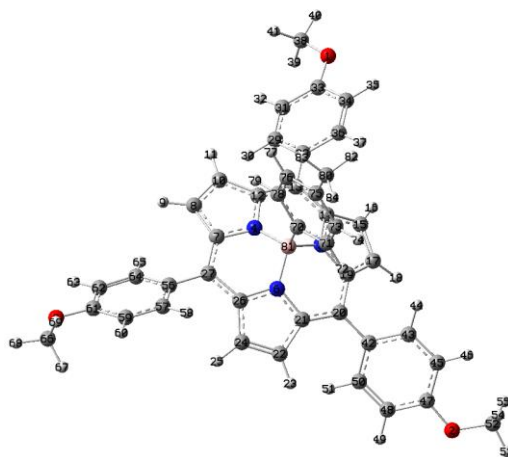

Fig. S97 Optimized structures of 4b.

Table S26 Coordinates of atoms in 4b.

| Center Number | Atomic Number | Atomic Type | Coordinates (Angstroms) |           |           |
|---------------|---------------|-------------|-------------------------|-----------|-----------|
|               |               |             | X                       | Y         | Z         |
| 1             | 8             | 0           | 6.765872                | 14.280087 | 5.518817  |
| 2             | 8             | 0           | 7.959129                | 1.248791  | 0.245202  |
| 3             | 8             | 0           | -1.496759               | 3.427214  | 10.932269 |
| 4             | 7             | 0           | 4.473656                | 6.971939  | 7.299037  |
| 5             | 7             | 0           | 6.186543                | 6.532143  | 5.703703  |
| 6             | 7             | 0           | 4.796271                | 4.761424  | 6.509522  |
| 7             | 6             | 0           | 3.361001                | 6.626572  | 8.007001  |
| 8             | 6             | 0           | 2.810041                | 7.860903  | 8.493357  |
| 9             | 1             | 0           | 1.937595                | 7.968978  | 9.120274  |
| 10            | 6             | 0           | 3.585464                | 8.897378  | 7.997491  |
| 11            | 1             | 0           | 3.420016                | 9.949769  | 8.173625  |
| 12            | 6             | 0           | 4.629589                | 8.322166  | 7.195646  |
| 13            | 6             | 0           | 5.632317                | 8.821160  | 6.290576  |
| 14            | 6             | 0           | 6.321468                | 7.866410  | 5.459642  |
| 15            | 6             | 0           | 6.928277                | 7.977166  | 4.162025  |
| 16            | 1             | 0           | 7.145888                | 8.902288  | 3.647723  |
| 17            | 6             | 0           | 7.070710                | 6.699031  | 3.653165  |
| 18            | 1             | 0           | 7.420272                | 6.434866  | 2.665522  |
| 19            | 6             | 0           | 6.555933                | 5.778835  | 4.629740  |
| 20            | 6             | 0           | 6.131223                | 4.406089  | 4.535864  |
| 21            | 6             | 0           | 5.149733                | 3.938957  | 5.481545  |
| 22            | 6             | 0           | 4.246440                | 2.821304  | 5.544165  |
| 23            | 1             | 0           | 4.253314                | 1.958644  | 4.895445  |
| 24            | 6             | 0           | 3.329443                | 3.074660  | 6.549160  |
| 25            | 1             | 0           | 2.470447                | 2.469196  | 6.800551  |
| 26            | 6             | 0           | 3.670618                | 4.334935  | 7.147958  |
| 27            | 6             | 0           | 2.961331                | 5.241669  | 8.012812  |

|    |   |   |            |            |            |
|----|---|---|------------|------------|------------|
| 28 | 6 | 0 | 5. 874629  | 10. 245896 | 6. 092780  |
| 29 | 6 | 0 | 4. 836279  | 11. 200978 | 6. 102323  |
| 30 | 1 | 0 | 3. 807753  | 10. 873071 | 6. 204142  |
| 31 | 6 | 0 | 5. 086831  | 12. 552686 | 5. 907127  |
| 32 | 1 | 0 | 4. 258015  | 13. 250369 | 5. 894287  |
| 33 | 6 | 0 | 6. 406312  | 12. 996756 | 5. 707227  |
| 34 | 6 | 0 | 7. 457346  | 12. 058425 | 5. 689983  |
| 35 | 1 | 0 | 8. 470088  | 12. 420105 | 5. 546197  |
| 36 | 6 | 0 | 7. 193737  | 10. 714726 | 5. 868101  |
| 37 | 1 | 0 | 8. 017504  | 10. 008219 | 5. 882037  |
| 38 | 6 | 0 | 5. 763563  | 15. 297851 | 5. 536986  |
| 39 | 1 | 0 | 5. 035732  | 15. 149659 | 4. 730777  |
| 40 | 1 | 0 | 6. 296422  | 16. 235517 | 5. 379345  |
| 41 | 1 | 0 | 5. 247837  | 15. 326236 | 6. 503732  |
| 42 | 6 | 0 | 6. 603361  | 3. 591206  | 3. 419528  |
| 43 | 6 | 0 | 7. 959335  | 3. 651566  | 3. 032342  |
| 44 | 1 | 0 | 8. 642749  | 4. 282430  | 3. 592173  |
| 45 | 6 | 0 | 8. 457637  | 2. 881617  | 1. 988576  |
| 46 | 1 | 0 | 9. 511567  | 2. 936675  | 1. 743409  |
| 47 | 6 | 0 | 7. 593018  | 2. 033648  | 1. 275873  |
| 48 | 6 | 0 | 6. 230068  | 1. 977121  | 1. 631990  |
| 49 | 1 | 0 | 5. 571911  | 1. 340091  | 1. 050412  |
| 50 | 6 | 0 | 5. 750647  | 2. 732183  | 2. 683734  |
| 51 | 1 | 0 | 4. 689875  | 2. 708862  | 2. 905590  |
| 52 | 6 | 0 | 9. 319660  | 1. 257652  | -0. 190322 |
| 53 | 1 | 0 | 9. 363461  | 0. 559997  | -1. 026607 |
| 54 | 1 | 0 | 9. 991140  | 0. 917916  | 0. 606636  |
| 55 | 1 | 0 | 9. 618935  | 2. 256333  | -0. 528694 |
| 56 | 6 | 0 | 1. 803120  | 4. 764017  | 8. 761036  |
| 57 | 6 | 0 | 1. 847934  | 3. 506274  | 9. 400188  |
| 58 | 1 | 0 | 2. 760418  | 2. 920421  | 9. 352448  |
| 59 | 6 | 0 | 0. 776937  | 3. 024994  | 10. 142767 |
| 60 | 1 | 0 | 0. 863934  | 2. 068117  | 10. 643390 |
| 61 | 6 | 0 | -0. 396153 | 3. 791700  | 10. 248210 |
| 62 | 6 | 0 | -0. 468494 | 5. 041042  | 9. 598479  |
| 63 | 1 | 0 | -1. 393104 | 5. 604477  | 9. 667960  |
| 64 | 6 | 0 | 0. 609313  | 5. 517422  | 8. 879420  |
| 65 | 1 | 0 | 0. 513624  | 6. 458661  | 8. 349730  |
| 66 | 6 | 0 | -1. 513684 | 2. 170327  | 11. 611057 |
| 67 | 1 | 0 | -1. 380966 | 1. 340297  | 10. 907615 |
| 68 | 1 | 0 | -2. 497477 | 2. 102087  | 12. 075306 |
| 69 | 1 | 0 | -0. 738876 | 2. 129882  | 12. 385311 |
| 70 | 6 | 0 | 6. 610227  | 5. 703795  | 8. 167161  |
| 71 | 6 | 0 | 7. 620403  | 4. 736368  | 8. 025833  |
| 72 | 1 | 0 | 7. 693986  | 4. 157067  | 7. 106681  |
| 73 | 6 | 0 | 8. 540132  | 4. 484036  | 9. 040918  |
| 74 | 1 | 0 | 9. 305166  | 3. 723864  | 8. 895823  |
| 75 | 6 | 0 | 8. 493476  | 5. 191979  | 10. 250917 |
| 76 | 6 | 0 | 7. 488389  | 6. 152805  | 10. 402842 |
| 77 | 1 | 0 | 7. 421160  | 6. 713520  | 11. 332844 |
| 78 | 6 | 0 | 6. 568079  | 6. 402772  | 9. 382208  |
| 79 | 1 | 0 | 5. 803302  | 7. 157721  | 9. 549588  |
| 80 | 6 | 0 | 9. 507931  | 4. 937160  | 11. 340669 |
| 81 | 5 | 0 | 5. 563793  | 5. 981272  | 6. 961761  |
| 82 | 1 | 0 | 10. 444307 | 5. 476312  | 11. 144949 |
| 83 | 1 | 0 | 9. 139517  | 5. 267810  | 12. 316976 |
| 84 | 1 | 0 | 9. 758871  | 3. 873411  | 11. 415306 |

---

**4c**

Zero-point correction= 1.311516 (Hartree/Particle)  
Thermal correction to Energy= 1.380669  
Thermal correction to Enthalpy= 1.381613  
Thermal correction to Gibbs Free Energy= 1.198098  
Sum of electronic and zero-point Energies= -2838.513132  
Sum of electronic and thermal Energies= -2838.443979  
Sum of electronic and thermal Enthalpies= -2838.443034  
Sum of electronic and thermal Free Energies= -2838.626550

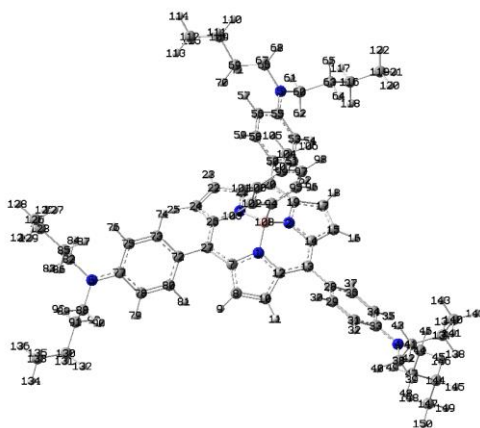

Fig. S98 Optimized structures of **4c**.

Table S27 Coordinates of atoms in **4c**.

---

| Center Number | Atomic Number | Atomic Type | Coordinates (Angstroms) |           |          |
|---------------|---------------|-------------|-------------------------|-----------|----------|
|               |               |             | X                       | Y         | Z        |
| 1             | 7             | 0           | 23.562868               | 13.290203 | 4.785119 |
| 2             | 7             | 0           | 24.646739               | 15.034600 | 5.970710 |
| 3             | 7             | 0           | 22.276624               | 14.826865 | 6.090525 |
| 4             | 7             | 0           | 30.902884               | 11.779581 | 2.356979 |
| 5             | 7             | 0           | 22.861381               | 21.629177 | 9.995015 |
| 6             | 7             | 0           | 16.201344               | 11.690101 | 2.244018 |
| 7             | 6             | 0           | 22.461813               | 12.862598 | 4.098438 |
| 8             | 6             | 0           | 22.967096               | 12.079535 | 3.005205 |
| 9             | 1             | 0           | 22.381341               | 11.565248 | 2.258486 |
| 10            | 6             | 0           | 24.350713               | 12.153654 | 3.031257 |
| 11            | 1             | 0           | 25.024860               | 11.740342 | 2.294230 |
| 12            | 6             | 0           | 24.728827               | 12.951797 | 4.160593 |
| 13            | 6             | 0           | 25.960362               | 13.594770 | 4.547928 |
| 14            | 6             | 0           | 25.865479               | 14.730566 | 5.432230 |
| 15            | 6             | 0           | 26.749419               | 15.773497 | 5.866674 |
| 16            | 1             | 0           | 27.805234               | 15.851620 | 5.653738 |
| 17            | 6             | 0           | 26.003741               | 16.693336 | 6.589962 |
| 18            | 1             | 0           | 26.387808               | 17.601153 | 7.030670 |
| 19            | 6             | 0           | 24.642854               | 16.237552 | 6.618021 |
| 20            | 6             | 0           | 23.375407               | 16.778154 | 7.047758 |
| 21            | 6             | 0           | 22.183515               | 16.077948 | 6.629210 |

---

|    |   |   |            |            |            |
|----|---|---|------------|------------|------------|
| 22 | 6 | 0 | 20. 844860 | 16. 522527 | 6. 367453  |
| 23 | 1 | 0 | 20. 441605 | 17. 491762 | 6. 625529  |
| 24 | 6 | 0 | 20. 208036 | 15. 539959 | 5. 627330  |
| 25 | 1 | 0 | 19. 216593 | 15. 600574 | 5. 200957  |
| 26 | 6 | 0 | 21. 142866 | 14. 471350 | 5. 418872  |
| 27 | 6 | 0 | 21. 167415 | 13. 376214 | 4. 480022  |
| 28 | 6 | 0 | 27. 218621 | 13. 156215 | 3. 965131  |
| 29 | 6 | 0 | 27. 468879 | 11. 780365 | 3. 737633  |
| 30 | 1 | 0 | 26. 719881 | 11. 050676 | 4. 028204  |
| 31 | 6 | 0 | 28. 664786 | 11. 323379 | 3. 219283  |
| 32 | 1 | 0 | 28. 801449 | 10. 254786 | 3. 114967  |
| 33 | 6 | 0 | 29. 710491 | 12. 222778 | 2. 860629  |
| 34 | 6 | 0 | 29. 444642 | 13. 610816 | 3. 052671  |
| 35 | 1 | 0 | 30. 171036 | 14. 353174 | 2. 747795  |
| 36 | 6 | 0 | 28. 252650 | 14. 049546 | 3. 593209  |
| 37 | 1 | 0 | 28. 090723 | 15. 118713 | 3. 672065  |
| 38 | 6 | 0 | 31. 133807 | 10. 355916 | 2. 067691  |
| 39 | 1 | 0 | 31. 919969 | 10. 310296 | 1. 308043  |
| 40 | 1 | 0 | 30. 235777 | 9. 932890  | 1. 605494  |
| 41 | 6 | 0 | 31. 546647 | 9. 505837  | 3. 282307  |
| 42 | 1 | 0 | 31. 594887 | 8. 462080  | 2. 940274  |
| 43 | 1 | 0 | 30. 758495 | 9. 545205  | 4. 045153  |
| 44 | 6 | 0 | 31. 971418 | 12. 710915 | 1. 968582  |
| 45 | 1 | 0 | 32. 914924 | 12. 163475 | 2. 039056  |
| 46 | 1 | 0 | 32. 032364 | 13. 520486 | 2. 702612  |
| 47 | 6 | 0 | 31. 812732 | 13. 276953 | 0. 548622  |
| 48 | 1 | 0 | 31. 758235 | 12. 442057 | -0. 163586 |
| 49 | 1 | 0 | 30. 859191 | 13. 815817 | 0. 472911  |
| 50 | 6 | 0 | 23. 251685 | 18. 033306 | 7. 767582  |
| 51 | 6 | 0 | 24. 136081 | 19. 125904 | 7. 587812  |
| 52 | 1 | 0 | 24. 909285 | 19. 072608 | 6. 830350  |
| 53 | 6 | 0 | 24. 008538 | 20. 301113 | 8. 299273  |
| 54 | 1 | 0 | 24. 714609 | 21. 097323 | 8. 100271  |
| 55 | 6 | 0 | 22. 979753 | 20. 476465 | 9. 271602  |
| 56 | 6 | 0 | 22. 078849 | 19. 385229 | 9. 443784  |
| 57 | 1 | 0 | 21. 269696 | 19. 451610 | 10. 160137 |
| 58 | 6 | 0 | 22. 213914 | 18. 220260 | 8. 716053  |
| 59 | 1 | 0 | 21. 522771 | 17. 406912 | 8. 912336  |
| 60 | 6 | 0 | 23. 740500 | 22. 785437 | 9. 777472  |
| 61 | 1 | 0 | 23. 168207 | 23. 676670 | 10. 054433 |
| 62 | 1 | 0 | 23. 959596 | 22. 883062 | 8. 710141  |
| 63 | 6 | 0 | 25. 038910 | 22. 730803 | 10. 595603 |
| 64 | 1 | 0 | 25. 602504 | 21. 828291 | 10. 324840 |
| 65 | 1 | 0 | 24. 784702 | 22. 634411 | 11. 660082 |
| 66 | 6 | 0 | 21. 861027 | 21. 783032 | 11. 058958 |
| 67 | 1 | 0 | 21. 741455 | 20. 832336 | 11. 587197 |
| 68 | 1 | 0 | 22. 276339 | 22. 487573 | 11. 786676 |
| 69 | 6 | 0 | 20. 502275 | 22. 297645 | 10. 560322 |
| 70 | 1 | 0 | 20. 093600 | 21. 592369 | 9. 824575  |
| 71 | 1 | 0 | 20. 651965 | 23. 249940 | 10. 033406 |
| 72 | 6 | 0 | 19. 918690 | 12. 930448 | 3. 883428  |
| 73 | 6 | 0 | 18. 733035 | 12. 883505 | 4. 660385  |
| 74 | 1 | 0 | 18. 781978 | 13. 134556 | 5. 715214  |
| 75 | 6 | 0 | 17. 524439 | 12. 464203 | 4. 141546  |
| 76 | 1 | 0 | 16. 673498 | 12. 403296 | 4. 808286  |
| 77 | 6 | 0 | 17. 397638 | 12. 081840 | 2. 774313  |
| 78 | 6 | 0 | 18. 586280 | 12. 137388 | 1. 987915  |

|     |   |   |            |            |            |
|-----|---|---|------------|------------|------------|
| 79  | 1 | 0 | 18. 553356 | 11. 901365 | 0. 931729  |
| 80  | 6 | 0 | 19. 791335 | 12. 538400 | 2. 527975  |
| 81  | 1 | 0 | 20. 642419 | 12. 618684 | 1. 862363  |
| 82  | 6 | 0 | 14. 951618 | 11. 753832 | 3. 011658  |
| 83  | 1 | 0 | 14. 143381 | 11. 924622 | 2. 292685  |
| 84  | 1 | 0 | 14. 971872 | 12. 631445 | 3. 664707  |
| 85  | 6 | 0 | 14. 660722 | 10. 482468 | 3. 822965  |
| 86  | 1 | 0 | 14. 635864 | 9. 621770  | 3. 140562  |
| 87  | 1 | 0 | 15. 485532 | 10. 302649 | 4. 524902  |
| 88  | 6 | 0 | 16. 080406 | 11. 185141 | 0. 870204  |
| 89  | 1 | 0 | 15. 241185 | 10. 483846 | 0. 866051  |
| 90  | 1 | 0 | 16. 970553 | 10. 600725 | 0. 618108  |
| 91  | 6 | 0 | 15. 852851 | 12. 294517 | -0. 170104 |
| 92  | 1 | 0 | 16. 685592 | 13. 006578 | -0. 114429 |
| 93  | 1 | 0 | 14. 945082 | 12. 853506 | 0. 096238  |
| 94  | 6 | 0 | 23. 690796 | 13. 036126 | 7. 407695  |
| 95  | 6 | 0 | 24. 664958 | 13. 224916 | 8. 399945  |
| 96  | 1 | 0 | 25. 375963 | 14. 043456 | 8. 310736  |
| 97  | 6 | 0 | 24. 757481 | 12. 384000 | 9. 514322  |
| 98  | 1 | 0 | 25. 530159 | 12. 563997 | 10. 259555 |
| 99  | 6 | 0 | 23. 874152 | 11. 312739 | 9. 687877  |
| 100 | 6 | 0 | 22. 896508 | 11. 111004 | 8. 700297  |
| 101 | 1 | 0 | 22. 196748 | 10. 283020 | 8. 801996  |
| 102 | 6 | 0 | 22. 810779 | 11. 952268 | 7. 592122  |
| 103 | 1 | 0 | 22. 038303 | 11. 753084 | 6. 851391  |
| 104 | 6 | 0 | 23. 953413 | 10. 410999 | 10. 897285 |
| 105 | 1 | 0 | 23. 114181 | 10. 588225 | 11. 583383 |
| 106 | 1 | 0 | 24. 878720 | 10. 575765 | 11. 459629 |
| 107 | 1 | 0 | 23. 914387 | 9. 352358  | 10. 612985 |
| 108 | 5 | 0 | 23. 544791 | 14. 010903 | 6. 111847  |
| 109 | 6 | 0 | 19. 499871 | 22. 491672 | 11. 704967 |
| 110 | 1 | 0 | 19. 916019 | 23. 198535 | 12. 436822 |
| 111 | 1 | 0 | 19. 368107 | 21. 539401 | 12. 238095 |
| 112 | 6 | 0 | 18. 137460 | 22. 998793 | 11. 223857 |
| 113 | 1 | 0 | 17. 679226 | 22. 296489 | 10. 516125 |
| 114 | 1 | 0 | 17. 442682 | 23. 127152 | 12. 062426 |
| 115 | 1 | 0 | 18. 230323 | 23. 967468 | 10. 716778 |
| 116 | 6 | 0 | 25. 915176 | 23. 972056 | 10. 384947 |
| 117 | 1 | 0 | 25. 339092 | 24. 872445 | 10. 641840 |
| 118 | 1 | 0 | 26. 167806 | 24. 062467 | 9. 318942  |
| 119 | 6 | 0 | 27. 203529 | 23. 939190 | 11. 211711 |
| 120 | 1 | 0 | 27. 816937 | 23. 065018 | 10. 959162 |
| 121 | 1 | 0 | 27. 811066 | 24. 834667 | 11. 034440 |
| 122 | 1 | 0 | 26. 985809 | 23. 892209 | 12. 286176 |
| 123 | 6 | 0 | 13. 336122 | 10. 572702 | 4. 591174  |
| 124 | 1 | 0 | 12. 516174 | 10. 757371 | 3. 882743  |
| 125 | 1 | 0 | 13. 364056 | 11. 442987 | 5. 262185  |
| 126 | 6 | 0 | 13. 031503 | 9. 312495  | 5. 405894  |
| 127 | 1 | 0 | 13. 818779 | 9. 115999  | 6. 144637  |
| 128 | 1 | 0 | 12. 083498 | 9. 410279  | 5. 948203  |
| 129 | 1 | 0 | 12. 955268 | 8. 428977  | 4. 759582  |
| 130 | 6 | 0 | 15. 731456 | 11. 767715 | -1. 609661 |
| 131 | 1 | 0 | 15. 735505 | 12. 628790 | -2. 290539 |
| 132 | 1 | 0 | 16. 626840 | 11. 179631 | -1. 857511 |
| 133 | 6 | 0 | 14. 477108 | 10. 928618 | -1. 878744 |
| 134 | 1 | 0 | 14. 423203 | 10. 635811 | -2. 934101 |
| 135 | 1 | 0 | 14. 458874 | 10. 007327 | -1. 284434 |

|     |   |   |           |           |           |
|-----|---|---|-----------|-----------|-----------|
| 136 | 1 | 0 | 13.565945 | 11.494268 | -1.644753 |
| 137 | 6 | 0 | 32.887003 | 9.894449  | 3.919483  |
| 138 | 1 | 0 | 33.680902 | 9.844473  | 3.160535  |
| 139 | 1 | 0 | 32.844476 | 10.937884 | 4.258956  |
| 140 | 6 | 0 | 33.257292 | 8.995546  | 5.102852  |
| 141 | 1 | 0 | 33.344109 | 7.945978  | 4.794226  |
| 142 | 1 | 0 | 34.216277 | 9.293395  | 5.543198  |
| 143 | 1 | 0 | 32.497702 | 9.046548  | 5.893249  |
| 144 | 6 | 0 | 32.967102 | 14.210431 | 0.162161  |
| 145 | 1 | 0 | 33.918303 | 13.665568 | 0.243989  |
| 146 | 1 | 0 | 33.023833 | 15.037182 | 0.884486  |
| 147 | 6 | 0 | 32.825694 | 14.779611 | -1.252426 |
| 148 | 1 | 0 | 31.897455 | 15.355132 | -1.358686 |
| 149 | 1 | 0 | 33.660634 | 15.446874 | -1.497467 |
| 150 | 1 | 0 | 32.807934 | 13.979805 | -2.003573 |

#### 4d

|                                              |                             |
|----------------------------------------------|-----------------------------|
| Zero-point correction=                       | 1.307179 (Hartree/Particle) |
| Thermal correction to Energy=                | 1.378203                    |
| Thermal correction to Enthalpy=              | 1.379147                    |
| Thermal correction to Gibbs Free Energy=     | 1.196512                    |
| Sum of electronic and zero-point Energies=   | -2838.485297                |
| Sum of electronic and thermal Energies=      | -2838.414274                |
| Sum of electronic and thermal Enthalpies=    | -2838.413329                |
| Sum of electronic and thermal Free Energies= | -2838.595964                |

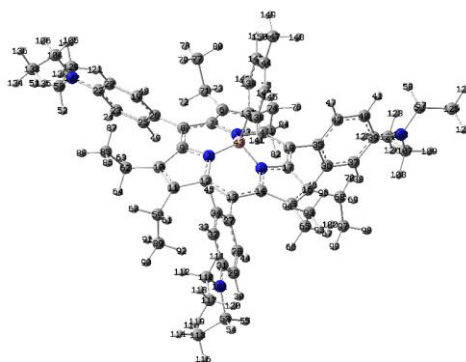

Fig. S99 Optimized structures of 4d.

Table S28 Coordinates of atoms in 4d.

| Center Number | Atomic Number | Atomic Type | Coordinates (Angstroms) |           |          |
|---------------|---------------|-------------|-------------------------|-----------|----------|
|               |               |             | X                       | Y         | Z        |
| 1             | 7             | 0           | 4.267285                | 9.325695  | 3.818973 |
| 2             | 7             | 0           | 2.433105                | 10.455723 | 4.852008 |
| 3             | 7             | 0           | 3.281431                | 11.187111 | 2.739640 |
| 4             | 6             | 0           | 4.086471                | 11.037260 | 1.645341 |
| 5             | 6             | 0           | 3.571850                | 11.952770 | 0.646074 |
| 6             | 6             | 0           | 2.448831                | 12.587202 | 1.190117 |
| 7             | 6             | 0           | 2.240115                | 12.035609 | 2.521917 |
| 8             | 6             | 0           | 1.235039                | 12.118624 | 3.556601 |

|    |   |   |            |            |            |
|----|---|---|------------|------------|------------|
| 9  | 6 | 0 | 1. 302237  | 11. 199546 | 4. 667432  |
| 10 | 6 | 0 | 0. 291528  | 10. 610363 | 5. 523918  |
| 11 | 6 | 0 | 0. 859108  | 9. 486411  | 6. 133898  |
| 12 | 6 | 0 | 2. 229890  | 9. 385014  | 5. 674359  |
| 13 | 6 | 0 | 3. 219192  | 8. 333240  | 5. 725016  |
| 14 | 6 | 0 | 4. 247501  | 8. 297998  | 4. 712958  |
| 15 | 6 | 0 | 5. 298208  | 7. 381990  | 4. 290356  |
| 16 | 6 | 0 | 5. 823374  | 7. 875429  | 3. 090542  |
| 17 | 6 | 0 | 5. 130430  | 9. 110495  | 2. 782150  |
| 18 | 6 | 0 | 5. 095112  | 10. 021079 | 1. 676840  |
| 19 | 6 | 0 | -0. 125893 | 13. 986592 | 4. 497879  |
| 20 | 6 | 0 | -1. 169898 | 14. 892159 | 4. 445210  |
| 21 | 1 | 0 | -1. 275588 | 15. 602733 | 5. 255365  |
| 22 | 6 | 0 | -2. 097261 | 14. 887207 | 3. 363701  |
| 23 | 6 | 0 | -1. 897070 | 13. 901406 | 2. 353174  |
| 24 | 1 | 0 | -2. 583104 | 13. 823603 | 1. 519101  |
| 25 | 6 | 0 | -0. 824857 | 13. 029544 | 2. 403394  |
| 26 | 6 | 0 | 0. 100442  | 13. 045613 | 3. 468981  |
| 27 | 6 | 0 | 3. 101681  | 7. 291985  | 6. 752499  |
| 28 | 6 | 0 | 2. 968990  | 5. 922661  | 6. 442278  |
| 29 | 6 | 0 | 2. 840148  | 4. 957276  | 7. 424241  |
| 30 | 1 | 0 | 2. 690260  | 3. 932401  | 7. 110865  |
| 31 | 6 | 0 | 2. 885352  | 5. 294732  | 8. 808974  |
| 32 | 6 | 0 | 2. 992202  | 6. 682179  | 9. 118529  |
| 33 | 1 | 0 | 3. 003294  | 7. 018919  | 10. 146476 |
| 34 | 6 | 0 | 3. 079213  | 7. 638019  | 8. 120772  |
| 35 | 6 | 0 | 6. 046860  | 9. 877504  | 0. 537883  |
| 36 | 6 | 0 | 5. 823802  | 8. 981040  | -0. 517526 |
| 37 | 6 | 0 | 6. 712655  | 8. 868759  | -1. 580954 |
| 38 | 1 | 0 | 6. 472090  | 8. 165587  | -2. 368504 |
| 39 | 6 | 0 | 7. 901734  | 9. 640695  | -1. 640162 |
| 40 | 6 | 0 | 8. 105160  | 10. 561715 | -0. 580492 |
| 41 | 1 | 0 | 8. 968333  | 11. 214721 | -0. 572642 |
| 42 | 6 | 0 | 7. 202365  | 10. 668623 | 0. 474270  |
| 43 | 5 | 0 | 3. 708516  | 10. 700180 | 4. 097427  |
| 44 | 1 | 0 | 2. 908090  | 5. 617557  | 5. 402174  |
| 45 | 1 | 0 | 3. 158664  | 8. 683883  | 8. 404873  |
| 46 | 1 | 0 | 4. 929094  | 8. 364559  | -0. 518527 |
| 47 | 1 | 0 | 7. 402849  | 11. 389521 | 1. 262836  |
| 48 | 1 | 0 | 0. 559439  | 14. 024582 | 5. 339602  |
| 49 | 1 | 0 | -0. 727712 | 12. 279282 | 1. 624531  |
| 50 | 6 | 0 | -4. 157684 | 15. 716898 | 2. 252169  |
| 51 | 1 | 0 | -5. 073802 | 16. 137457 | 2. 677695  |
| 52 | 1 | 0 | -4. 378173 | 14. 671142 | 2. 021514  |
| 53 | 6 | 0 | 2. 537430  | 2. 939151  | 9. 457268  |
| 54 | 1 | 0 | 2. 927347  | 2. 313388  | 10. 259624 |
| 55 | 1 | 0 | 3. 107501  | 2. 666413  | 8. 565987  |
| 56 | 6 | 0 | 10. 002265 | 10. 371945 | -2. 678128 |
| 57 | 1 | 0 | 10. 436252 | 10. 345083 | -1. 673651 |
| 58 | 1 | 0 | 9. 708333  | 11. 418031 | -2. 865191 |
| 59 | 6 | 0 | 0. 069272  | 8. 492954  | 6. 950315  |
| 60 | 1 | 0 | -0. 741306 | 9. 022232  | 7. 461670  |
| 61 | 1 | 0 | 0. 685898  | 8. 055257  | 7. 736613  |
| 62 | 6 | 0 | -1. 148990 | 11. 024360 | 5. 691634  |
| 63 | 1 | 0 | -1. 475968 | 11. 600222 | 4. 823322  |
| 64 | 1 | 0 | -1. 776244 | 10. 125534 | 5. 716378  |
| 65 | 6 | 0 | 5. 848452  | 6. 179966  | 5. 016403  |

|     |   |   |            |            |            |
|-----|---|---|------------|------------|------------|
| 66  | 1 | 0 | 5. 058832  | 5. 469497  | 5. 268691  |
| 67  | 1 | 0 | 6. 527908  | 5. 645173  | 4. 346568  |
| 68  | 6 | 0 | 6. 896947  | 7. 203079  | 2. 272702  |
| 69  | 1 | 0 | 7. 681298  | 6. 840351  | 2. 947878  |
| 70  | 1 | 0 | 7. 374822  | 7. 934196  | 1. 617674  |
| 71  | 6 | 0 | 1. 699140  | 13. 699357 | 0. 500180  |
| 72  | 1 | 0 | 0. 622983  | 13. 518202 | 0. 507634  |
| 73  | 1 | 0 | 1. 991452  | 13. 718711 | -0. 553859 |
| 74  | 6 | 0 | 4. 085249  | 12. 158577 | -0. 756656 |
| 75  | 1 | 0 | 4. 027614  | 13. 224994 | -1. 004166 |
| 76  | 1 | 0 | 5. 141909  | 11. 891193 | -0. 810401 |
| 77  | 6 | 0 | 1. 979168  | 15. 082824 | 1. 115769  |
| 78  | 1 | 0 | 1. 427730  | 15. 859879 | 0. 572984  |
| 79  | 1 | 0 | 1. 673618  | 15. 123860 | 2. 166439  |
| 80  | 1 | 0 | 3. 046460  | 15. 327978 | 1. 065695  |
| 81  | 6 | 0 | 3. 306945  | 11. 358508 | -1. 817446 |
| 82  | 1 | 0 | 3. 360818  | 10. 282511 | -1. 620016 |
| 83  | 1 | 0 | 2. 248755  | 11. 643285 | -1. 835160 |
| 84  | 1 | 0 | 3. 724493  | 11. 539818 | -2. 814947 |
| 85  | 6 | 0 | -1. 414793 | 11. 842278 | 6. 969596  |
| 86  | 1 | 0 | -1. 163164 | 11. 269438 | 7. 869260  |
| 87  | 1 | 0 | -0. 824032 | 12. 763687 | 6. 986086  |
| 88  | 1 | 0 | -2. 474401 | 12. 117716 | 7. 030888  |
| 89  | 6 | 0 | -0. 538937 | 7. 362177  | 6. 098702  |
| 90  | 1 | 0 | -1. 112282 | 6. 673937  | 6. 731243  |
| 91  | 1 | 0 | -1. 214582 | 7. 760749  | 5. 333106  |
| 92  | 1 | 0 | 0. 239719  | 6. 783829  | 5. 590416  |
| 93  | 6 | 0 | 6. 616670  | 6. 553609  | 6. 297503  |
| 94  | 1 | 0 | 5. 968846  | 7. 056229  | 7. 023239  |
| 95  | 1 | 0 | 7. 020479  | 5. 652288  | 6. 774009  |
| 96  | 1 | 0 | 7. 455275  | 7. 222951  | 6. 072871  |
| 97  | 6 | 0 | 6. 386071  | 6. 021712  | 1. 427749  |
| 98  | 1 | 0 | 7. 208754  | 5. 580136  | 0. 853153  |
| 99  | 1 | 0 | 5. 954730  | 5. 237007  | 2. 059636  |
| 100 | 1 | 0 | 5. 614463  | 6. 343027  | 0. 720326  |
| 101 | 7 | 0 | 2. 830967  | 4. 338275  | 9. 792915  |
| 102 | 7 | 0 | -3. 132628 | 15. 779135 | 3. 302098  |
| 103 | 7 | 0 | 8. 825272  | 9. 488549  | -2. 669360 |
| 104 | 6 | 0 | -3. 280210 | 16. 870169 | 4. 273930  |
| 105 | 1 | 0 | -2. 290589 | 17. 244391 | 4. 550002  |
| 106 | 1 | 0 | -3. 785851 | 17. 691111 | 3. 756319  |
| 107 | 6 | 0 | 8. 399613  | 8. 885200  | -3. 937619 |
| 108 | 1 | 0 | 7. 872134  | 7. 951180  | -3. 726176 |
| 109 | 1 | 0 | 9. 296258  | 8. 592193  | -4. 485164 |
| 110 | 6 | 0 | 2. 788168  | 4. 769583  | 11. 205641 |
| 111 | 1 | 0 | 3. 598789  | 5. 489431  | 11. 356645 |
| 112 | 1 | 0 | 1. 846995  | 5. 305773  | 11. 396860 |
| 113 | 6 | 0 | 1. 046258  | 2. 651687  | 9. 252224  |
| 114 | 1 | 0 | 0. 473006  | 2. 877611  | 10. 158411 |
| 115 | 1 | 0 | 0. 631696  | 3. 245611  | 8. 430573  |
| 116 | 1 | 0 | 0. 900459  | 1. 591357  | 9. 014322  |
| 117 | 6 | 0 | 2. 955384  | 3. 659439  | 12. 238771 |
| 118 | 1 | 0 | 2. 971129  | 4. 126123  | 13. 229756 |
| 119 | 1 | 0 | 2. 132718  | 2. 937588  | 12. 228963 |
| 120 | 1 | 0 | 3. 900110  | 3. 119987  | 12. 111260 |
| 121 | 6 | 0 | 7. 533819  | 9. 796343  | -4. 815851 |
| 122 | 1 | 0 | 6. 615353  | 10. 095833 | -4. 299031 |



|     |   |   |           |           |           |
|-----|---|---|-----------|-----------|-----------|
| 123 | 1 | 0 | 8.075713  | 10.706302 | -5.099411 |
| 124 | 1 | 0 | 7.248862  | 9.273101  | -5.736752 |
| 125 | 6 | 0 | 11.101723 | 9.975470  | -3.661549 |
| 126 | 1 | 0 | 10.813387 | 10.115563 | -4.708103 |
| 127 | 1 | 0 | 11.973010 | 10.613574 | -3.475689 |
| 128 | 1 | 0 | 11.413381 | 8.934493  | -3.519899 |
| 129 | 6 | 0 | -3.775902 | 16.485686 | 0.984202  |
| 130 | 1 | 0 | -3.591116 | 17.542498 | 1.207665  |
| 131 | 1 | 0 | -2.873326 | 16.072949 | 0.521245  |
| 132 | 1 | 0 | -4.591946 | 16.430849 | 0.254179  |
| 133 | 6 | 0 | -4.077553 | 16.474222 | 5.520102  |
| 134 | 1 | 0 | -5.086982 | 16.142663 | 5.251505  |
| 135 | 1 | 0 | -3.586549 | 15.663506 | 6.068767  |
| 136 | 1 | 0 | -4.170561 | 17.336126 | 6.191182  |
| 137 | 6 | 0 | 4.753390  | 11.704924 | 4.855950  |
| 138 | 6 | 0 | 5.432120  | 11.311760 | 6.025375  |
| 139 | 6 | 0 | 5.000110  | 13.010506 | 4.402520  |
| 140 | 6 | 0 | 6.299952  | 12.169328 | 6.700472  |
| 141 | 1 | 0 | 5.285677  | 10.309917 | 6.423582  |
| 142 | 6 | 0 | 5.868069  | 13.877069 | 5.075629  |
| 143 | 1 | 0 | 4.508403  | 13.371922 | 3.502278  |
| 144 | 6 | 0 | 6.536074  | 13.473151 | 6.236661  |
| 145 | 1 | 0 | 6.805460  | 11.823833 | 7.600972  |
| 146 | 1 | 0 | 6.029265  | 14.881930 | 4.689208  |
| 147 | 6 | 0 | 7.489202  | 14.393247 | 6.961974  |
| 148 | 1 | 0 | 8.526182  | 14.041165 | 6.879033  |
| 149 | 1 | 0 | 7.451159  | 15.409663 | 6.556253  |
| 150 | 1 | 0 | 7.257768  | 14.448216 | 8.032996  |

## 5

|                                              |                             |
|----------------------------------------------|-----------------------------|
| Zero-point correction=                       | 0.115204 (Hartree/Particle) |
| Thermal correction to Energy=                | 0.121358                    |
| Thermal correction to Enthalpy=              | 0.122303                    |
| Thermal correction to Gibbs Free Energy=     | 0.084168                    |
| Sum of electronic and zero-point Energies=   | -270.773424                 |
| Sum of electronic and thermal Energies=      | -270.767270                 |
| Sum of electronic and thermal Enthalpies=    | -270.766325                 |
| Sum of electronic and thermal Free Energies= | -270.804460                 |

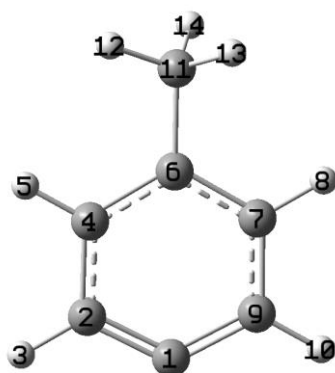

Fig. S100 Optimized structures of 5.

**Table S29** Coordinates of atoms in **5**.

| Center Number | Atomic Number | Atomic Type | Coordinates (Angstroms) |           |          |
|---------------|---------------|-------------|-------------------------|-----------|----------|
|               |               |             | X                       | Y         | Z        |
| 1             | 6             | 0           | 0.196084                | -0.057996 | 2.522310 |
| 2             | 6             | 0           | -0.349855               | -1.139962 | 3.175905 |
| 3             | 1             | 0           | -0.828287               | -1.962942 | 2.650771 |
| 4             | 6             | 0           | -0.260835               | -1.141130 | 4.578923 |
| 5             | 1             | 0           | -0.678076               | -1.977194 | 5.136862 |
| 6             | 6             | 0           | 0.354240                | -0.087009 | 5.269592 |
| 7             | 6             | 0           | 0.891277                | 0.982603  | 4.534043 |
| 8             | 1             | 0           | 1.374392                | 1.805660  | 5.057726 |
| 9             | 6             | 0           | 0.817035                | 1.011291  | 3.132997 |
| 10            | 1             | 0           | 1.236688                | 1.842848  | 2.572243 |
| 11            | 6             | 0           | 0.426416                | -0.087974 | 6.779929 |
| 12            | 1             | 0           | 0.144347                | -1.062228 | 7.191913 |
| 13            | 1             | 0           | 1.436476                | 0.149991  | 7.133885 |
| 14            | 1             | 0           | -0.249425               | 0.661982  | 7.211827 |

**6**

|                                              |                             |
|----------------------------------------------|-----------------------------|
| Zero-point correction=                       | 0.237054 (Hartree/Particle) |
| Thermal correction to Energy=                | 0.249551                    |
| Thermal correction to Enthalpy=              | 0.250496                    |
| Thermal correction to Gibbs Free Energy=     | 0.197560                    |
| Sum of electronic and zero-point Energies=   | -541.722657                 |
| Sum of electronic and thermal Energies=      | -541.710160                 |
| Sum of electronic and thermal Enthalpies=    | -541.709215                 |
| Sum of electronic and thermal Free Energies= | -541.762151                 |

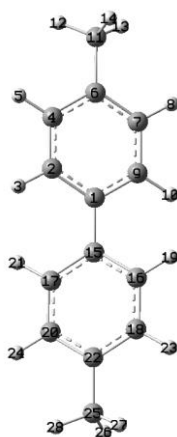**Fig. S101** Optimized structures of **6**.**Table S30** Coordinates of atoms in **6**.

| Center Number | Atomic Number | Atomic Type | Coordinates (Angstroms) |          |          |
|---------------|---------------|-------------|-------------------------|----------|----------|
|               |               |             | X                       | Y        | Z        |
| 1             | 6             | 0           | 6.850955                | 8.417454 | 7.794477 |

|    |   |   |          |           |           |
|----|---|---|----------|-----------|-----------|
| 2  | 6 | 0 | 7.903368 | 9.292317  | 7.472370  |
| 3  | 1 | 0 | 8.211033 | 9.403893  | 6.436203  |
| 4  | 6 | 0 | 8.547535 | 10.038895 | 8.457944  |
| 5  | 1 | 0 | 9.356643 | 10.708910 | 8.174770  |
| 6  | 6 | 0 | 8.168064 | 9.948935  | 9.804556  |
| 7  | 6 | 0 | 7.118677 | 9.076563  | 10.127377 |
| 8  | 1 | 0 | 6.808603 | 8.974552  | 11.165368 |
| 9  | 6 | 0 | 6.472284 | 8.327179  | 9.145736  |
| 10 | 1 | 0 | 5.680351 | 7.642183  | 9.436312  |
| 11 | 6 | 0 | 8.847458 | 10.780260 | 10.865821 |
| 12 | 1 | 0 | 9.880894 | 11.016952 | 10.590023 |
| 13 | 1 | 0 | 8.861838 | 10.263136 | 11.831684 |
| 14 | 1 | 0 | 8.325379 | 11.735296 | 11.017611 |
| 15 | 6 | 0 | 6.168072 | 7.613028  | 6.748097  |
| 16 | 6 | 0 | 4.789458 | 7.345550  | 6.817497  |
| 17 | 6 | 0 | 6.876073 | 7.092147  | 5.650488  |
| 18 | 6 | 0 | 4.151332 | 6.591099  | 5.834075  |
| 19 | 1 | 0 | 4.203639 | 7.754116  | 7.636641  |
| 20 | 6 | 0 | 6.233210 | 6.338623  | 4.669560  |
| 21 | 1 | 0 | 7.946686 | 7.261761  | 5.572742  |
| 22 | 6 | 0 | 4.859061 | 6.069269  | 4.741971  |
| 23 | 1 | 0 | 3.081034 | 6.411836  | 5.911440  |
| 24 | 1 | 0 | 6.811717 | 5.946409  | 3.835684  |
| 25 | 6 | 0 | 4.171306 | 5.225559  | 3.695628  |
| 26 | 1 | 0 | 4.205410 | 4.159111  | 3.958588  |
| 27 | 1 | 0 | 3.115423 | 5.498282  | 3.591060  |
| 28 | 1 | 0 | 4.650092 | 5.331702  | 2.715879  |

### 7c

Zero-point correction= 1.314356 (Hartree/Particle)  
 Thermal correction to Energy= 1.383238  
 Thermal correction to Enthalpy= 1.384182  
 Thermal correction to Gibbs Free Energy= 1.201078  
 Sum of electronic and zero-point Energies= -2838.339255  
 Sum of electronic and thermal Energies= -2838.270373  
 Sum of electronic and thermal Enthalpies= -2838.269429  
 Sum of electronic and thermal Free Energies= -2838.452533

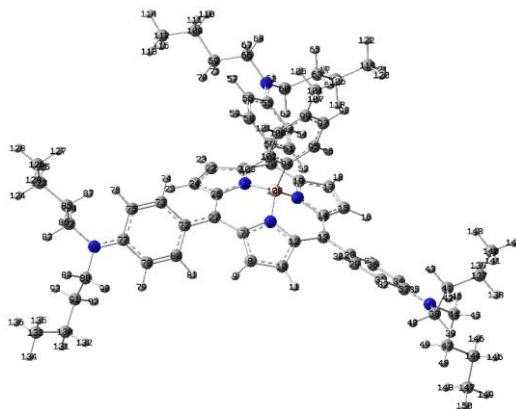

Fig. S102 Optimized structures of 7c.

**Table S31** Coordinates of atoms in **7c**.

| Center<br>Number | Atomic<br>Number | Atomic<br>Type | Coordinates (Angstroms) |           |           |
|------------------|------------------|----------------|-------------------------|-----------|-----------|
|                  |                  |                | X                       | Y         | Z         |
| 1                | 7                | 0              | 23.572375               | 13.396644 | 4.606553  |
| 2                | 7                | 0              | 24.641779               | 15.191490 | 5.731214  |
| 3                | 7                | 0              | 22.285615               | 14.891258 | 5.965183  |
| 4                | 7                | 0              | 30.896243               | 11.756144 | 2.366099  |
| 5                | 7                | 0              | 22.794430               | 21.557149 | 10.023903 |
| 6                | 7                | 0              | 16.180653               | 11.671309 | 2.332617  |
| 7                | 6                | 0              | 22.469517               | 12.929501 | 3.953263  |
| 8                | 6                | 0              | 22.962967               | 12.143985 | 2.863591  |
| 9                | 1                | 0              | 22.380503               | 11.594804 | 2.140482  |
| 10               | 6                | 0              | 24.347732               | 12.247717 | 2.858736  |
| 11               | 1                | 0              | 25.010439               | 11.840204 | 2.108947  |
| 12               | 6                | 0              | 24.728736               | 13.060294 | 3.970186  |
| 13               | 6                | 0              | 25.967262               | 13.731399 | 4.333070  |
| 14               | 6                | 0              | 25.859258               | 14.909283 | 5.182644  |
| 15               | 6                | 0              | 26.728194               | 15.965016 | 5.598271  |
| 16               | 1                | 0              | 27.778399               | 16.071076 | 5.375385  |
| 17               | 6                | 0              | 25.977601               | 16.869640 | 6.340154  |
| 18               | 1                | 0              | 26.362182               | 17.777761 | 6.778343  |
| 19               | 6                | 0              | 24.634038               | 16.384541 | 6.393927  |
| 20               | 6                | 0              | 23.360794               | 16.873842 | 6.897871  |
| 21               | 6                | 0              | 22.168312               | 16.133444 | 6.511512  |
| 22               | 6                | 0              | 20.819857               | 16.548300 | 6.283567  |
| 23               | 1                | 0              | 20.398129               | 17.507729 | 6.547252  |
| 24               | 6                | 0              | 20.187457               | 15.546740 | 5.559924  |
| 25               | 1                | 0              | 19.185000               | 15.586467 | 5.158445  |
| 26               | 6                | 0              | 21.140079               | 14.503963 | 5.336588  |
| 27               | 6                | 0              | 21.163865               | 13.402953 | 4.388715  |
| 28               | 6                | 0              | 27.208720               | 13.266848 | 3.792252  |
| 29               | 6                | 0              | 27.405885               | 11.877127 | 3.528717  |
| 30               | 1                | 0              | 26.613441               | 11.176868 | 3.766843  |
| 31               | 6                | 0              | 28.598994               | 11.377766 | 3.071921  |
| 32               | 1                | 0              | 28.694145               | 10.307136 | 2.951047  |
| 33               | 6                | 0              | 29.711203               | 12.239864 | 2.800052  |
| 34               | 6                | 0              | 29.499605               | 13.643619 | 3.009717  |
| 35               | 1                | 0              | 30.273651               | 14.354561 | 2.753398  |
| 36               | 6                | 0              | 28.312739               | 14.122524 | 3.501638  |
| 37               | 1                | 0              | 28.196737               | 15.195140 | 3.589427  |
| 38               | 6                | 0              | 31.095006               | 10.322009 | 2.077457  |
| 39               | 1                | 0              | 31.927241               | 10.260681 | 1.371261  |
| 40               | 1                | 0              | 30.214463               | 9.939307  | 1.554712  |
| 41               | 6                | 0              | 31.397524               | 9.457405  | 3.313966  |
| 42               | 1                | 0              | 31.459891               | 8.419278  | 2.959356  |
| 43               | 1                | 0              | 30.548707               | 9.497315  | 4.008391  |
| 44               | 6                | 0              | 32.044306               | 12.636200 | 2.080677  |
| 45               | 1                | 0              | 32.945384               | 12.035309 | 2.223809  |
| 46               | 1                | 0              | 32.080912               | 13.436391 | 2.824188  |
| 47               | 6                | 0              | 32.021420               | 13.207006 | 0.655089  |
| 48               | 1                | 0              | 31.969572               | 12.375390 | -0.060536 |
| 49               | 1                | 0              | 31.108477               | 13.800518 | 0.514755  |
| 50               | 6                | 0              | 23.223104               | 18.079796 | 7.653821  |
| 51               | 6                | 0              | 24.122114               | 19.182098 | 7.546010  |
| 52               | 1                | 0              | 24.907742               | 19.160954 | 6.802421  |

|     |   |   |            |            |            |
|-----|---|---|------------|------------|------------|
| 53  | 6 | 0 | 23. 976011 | 20. 320648 | 8. 294895  |
| 54  | 1 | 0 | 24. 677977 | 21. 129866 | 8. 144171  |
| 55  | 6 | 0 | 22. 923820 | 20. 449697 | 9. 261392  |
| 56  | 6 | 0 | 22. 017025 | 19. 345617 | 9. 374422  |
| 57  | 1 | 0 | 21. 205046 | 19. 378119 | 10. 088906 |
| 58  | 6 | 0 | 22. 156027 | 18. 227819 | 8. 592038  |
| 59  | 1 | 0 | 21. 465590 | 17. 405421 | 8. 741166  |
| 60  | 6 | 0 | 23. 674065 | 22. 729100 | 9. 870264  |
| 61  | 1 | 0 | 23. 086300 | 23. 602186 | 10. 168271 |
| 62  | 1 | 0 | 23. 917763 | 22. 864536 | 8. 813749  |
| 63  | 6 | 0 | 24. 949212 | 22. 642062 | 10. 720874 |
| 64  | 1 | 0 | 25. 518111 | 21. 748197 | 10. 433246 |
| 65  | 1 | 0 | 24. 668136 | 22. 512163 | 11. 774428 |
| 66  | 6 | 0 | 21. 772183 | 21. 674261 | 11. 078664 |
| 67  | 1 | 0 | 21. 639958 | 20. 703985 | 11. 564380 |
| 68  | 1 | 0 | 22. 182214 | 22. 348806 | 11. 835748 |
| 69  | 6 | 0 | 20. 430333 | 22. 218246 | 10. 566742 |
| 70  | 1 | 0 | 20. 027591 | 21. 535330 | 9. 807301  |
| 71  | 1 | 0 | 20. 600031 | 23. 181694 | 10. 067691 |
| 72  | 6 | 0 | 19. 924688 | 12. 927616 | 3. 851000  |
| 73  | 6 | 0 | 18. 743483 | 12. 928068 | 4. 654451  |
| 74  | 1 | 0 | 18. 815450 | 13. 218722 | 5. 696649  |
| 75  | 6 | 0 | 17. 532744 | 12. 488575 | 4. 182537  |
| 76  | 1 | 0 | 16. 696426 | 12. 449272 | 4. 868122  |
| 77  | 6 | 0 | 17. 379002 | 12. 051601 | 2. 826099  |
| 78  | 6 | 0 | 18. 561996 | 12. 048660 | 2. 015357  |
| 79  | 1 | 0 | 18. 504945 | 11. 768199 | 0. 971906  |
| 80  | 6 | 0 | 19. 773160 | 12. 453730 | 2. 514446  |
| 81  | 1 | 0 | 20. 609913 | 12. 498812 | 1. 829977  |
| 82  | 6 | 0 | 14. 938030 | 11. 775550 | 3. 116506  |
| 83  | 1 | 0 | 14. 129879 | 11. 948615 | 2. 399580  |
| 84  | 1 | 0 | 14. 985357 | 12. 661873 | 3. 753965  |
| 85  | 6 | 0 | 14. 642773 | 10. 516527 | 3. 944114  |
| 86  | 1 | 0 | 14. 610666 | 9. 648201  | 3. 272344  |
| 87  | 1 | 0 | 15. 468766 | 10. 342714 | 4. 646281  |
| 88  | 6 | 0 | 16. 016559 | 11. 140238 | 0. 967832  |
| 89  | 1 | 0 | 15. 161967 | 10. 459931 | 1. 002795  |
| 90  | 1 | 0 | 16. 887671 | 10. 534649 | 0. 705638  |
| 91  | 6 | 0 | 15. 783708 | 12. 245263 | -0. 075322 |
| 92  | 1 | 0 | 16. 641369 | 12. 929193 | -0. 061841 |
| 93  | 1 | 0 | 14. 905257 | 12. 835057 | 0. 219590  |
| 94  | 6 | 0 | 23. 822654 | 13. 167294 | 7. 216509  |
| 95  | 6 | 0 | 24. 860202 | 13. 371363 | 8. 138067  |
| 96  | 1 | 0 | 25. 558549 | 14. 193224 | 7. 996672  |
| 97  | 6 | 0 | 25. 031308 | 12. 536996 | 9. 247956  |
| 98  | 1 | 0 | 25. 849499 | 12. 727026 | 9. 939998  |
| 99  | 6 | 0 | 24. 168659 | 11. 460985 | 9. 484329  |
| 100 | 6 | 0 | 23. 128441 | 11. 246249 | 8. 565159  |
| 101 | 1 | 0 | 22. 442727 | 10. 414752 | 8. 718502  |
| 102 | 6 | 0 | 22. 962257 | 12. 080665 | 7. 461427  |
| 103 | 1 | 0 | 22. 143841 | 11. 875104 | 6. 773545  |
| 104 | 6 | 0 | 24. 338663 | 10. 561760 | 10. 685520 |
| 105 | 1 | 0 | 23. 498498 | 10. 665338 | 11. 384791 |
| 106 | 1 | 0 | 25. 257119 | 10. 795655 | 11. 233967 |
| 107 | 1 | 0 | 24. 379737 | 9. 505107  | 10. 393161 |
| 108 | 5 | 0 | 23. 581659 | 14. 127306 | 5. 927538  |
| 109 | 6 | 0 | 19. 413615 | 22. 393275 | 11. 701907 |

|     |   |   |           |           |           |
|-----|---|---|-----------|-----------|-----------|
| 110 | 1 | 0 | 19.822873 | 23.083710 | 12.452528 |
| 111 | 1 | 0 | 19.270368 | 21.431103 | 12.213435 |
| 112 | 6 | 0 | 18.061165 | 22.916389 | 11.210325 |
| 113 | 1 | 0 | 17.609694 | 22.230049 | 10.482957 |
| 114 | 1 | 0 | 17.355843 | 23.031321 | 12.041762 |
| 115 | 1 | 0 | 18.165865 | 23.894410 | 10.724174 |
| 116 | 6 | 0 | 25.827516 | 23.890642 | 10.568829 |
| 117 | 1 | 0 | 25.244488 | 24.781209 | 10.842266 |
| 118 | 1 | 0 | 26.103039 | 24.015171 | 9.512141  |
| 119 | 6 | 0 | 27.096924 | 23.831058 | 11.422842 |
| 120 | 1 | 0 | 27.718298 | 22.967190 | 11.155029 |
| 121 | 1 | 0 | 27.704799 | 24.733384 | 11.288253 |
| 122 | 1 | 0 | 26.855269 | 23.748412 | 12.489846 |
| 123 | 6 | 0 | 13.319827 | 10.628958 | 4.712220  |
| 124 | 1 | 0 | 12.500865 | 10.806359 | 4.001300  |
| 125 | 1 | 0 | 13.354368 | 11.509723 | 5.368783  |
| 126 | 6 | 0 | 13.010885 | 9.382708  | 5.546284  |
| 127 | 1 | 0 | 13.796917 | 9.194759  | 6.288450  |
| 128 | 1 | 0 | 12.063139 | 9.493585  | 6.086085  |
| 129 | 1 | 0 | 12.931052 | 8.489878  | 4.913515  |
| 130 | 6 | 0 | 15.588138 | 11.702339 | -1.500510 |
| 131 | 1 | 0 | 15.586973 | 12.556479 | -2.189834 |
| 132 | 1 | 0 | 16.456846 | 11.088393 | -1.777604 |
| 133 | 6 | 0 | 14.301561 | 10.895375 | -1.706342 |
| 134 | 1 | 0 | 14.194158 | 10.597004 | -2.755807 |
| 135 | 1 | 0 | 14.285095 | 9.978590  | -1.104955 |
| 136 | 1 | 0 | 13.416793 | 11.486853 | -1.437889 |
| 137 | 6 | 0 | 32.685069 | 9.816607  | 4.066142  |
| 138 | 1 | 0 | 33.536292 | 9.782494  | 3.371878  |
| 139 | 1 | 0 | 32.622646 | 10.848717 | 4.436100  |
| 140 | 6 | 0 | 32.952129 | 8.874836  | 5.244323  |
| 141 | 1 | 0 | 33.056519 | 7.835867  | 4.907135  |
| 142 | 1 | 0 | 33.874441 | 9.148545  | 5.770016  |
| 143 | 1 | 0 | 32.132331 | 8.906435  | 5.973199  |
| 144 | 6 | 0 | 33.255783 | 14.068610 | 0.360369  |
| 145 | 1 | 0 | 34.163205 | 13.468774 | 0.516366  |
| 146 | 1 | 0 | 33.304977 | 14.894620 | 1.083759  |
| 147 | 6 | 0 | 33.258371 | 14.635869 | -1.061991 |
| 148 | 1 | 0 | 32.379792 | 15.268374 | -1.241001 |
| 149 | 1 | 0 | 34.150545 | 15.247117 | -1.241635 |
| 150 | 1 | 0 | 33.248483 | 13.833808 | -1.810703 |

### TSa

|                                              |                             |
|----------------------------------------------|-----------------------------|
| Zero-point correction=                       | 0.655019 (Hartree/Particle) |
| Thermal correction to Energy=                | 0.693526                    |
| Thermal correction to Enthalpy=              | 0.694471                    |
| Thermal correction to Gibbs Free Energy=     | 0.581032                    |
| Sum of electronic and zero-point Energies=   | -1847.478844                |
| Sum of electronic and thermal Energies=      | -1847.440337                |
| Sum of electronic and thermal Enthalpies=    | -1847.439393                |
| Sum of electronic and thermal Free Energies= | -1847.552832                |

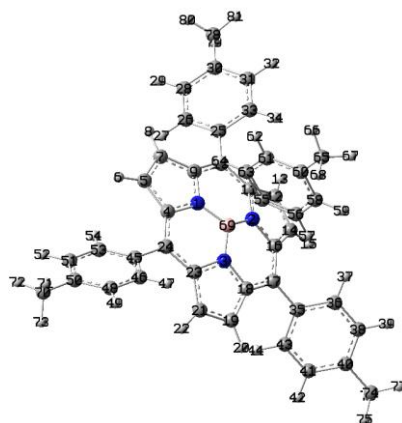

**Fig. S103** Optimized structures of TSA.

**Table S32** Coordinates of atoms in TSA.

| Center Number | Atomic Number | Atomic Type | Coordinates (Angstroms) |           |          |
|---------------|---------------|-------------|-------------------------|-----------|----------|
|               |               |             | X                       | Y         | Z        |
| 1             | 7             | 0           | 4.628794                | 4.232655  | 7.204803 |
| 2             | 7             | 0           | 6.445048                | 3.677448  | 5.758261 |
| 3             | 7             | 0           | 4.898112                | 1.989423  | 6.454095 |
| 4             | 6             | 0           | 3.441460                | 3.934595  | 7.837001 |
| 5             | 6             | 0           | 2.979056                | 5.206990  | 8.319628 |
| 6             | 1             | 0           | 2.079724                | 5.372817  | 8.895581 |
| 7             | 6             | 0           | 3.859742                | 6.194472  | 7.893008 |
| 8             | 1             | 0           | 3.756587                | 7.253538  | 8.082237 |
| 9             | 6             | 0           | 4.909841                | 5.579172  | 7.129368 |
| 10            | 6             | 0           | 6.002532                | 5.996392  | 6.302720 |
| 11            | 6             | 0           | 6.729294                | 5.012235  | 5.557402 |
| 12            | 6             | 0           | 7.605998                | 5.018121  | 4.419709 |
| 13            | 1             | 0           | 8.032850                | 5.900991  | 3.964782 |
| 14            | 6             | 0           | 7.746667                | 3.716490  | 3.957464 |
| 15            | 1             | 0           | 8.301416                | 3.411682  | 3.080920 |
| 16            | 6             | 0           | 6.962854                | 2.845551  | 4.788118 |
| 17            | 6             | 0           | 6.478666                | 1.500675  | 4.697215 |
| 18            | 6             | 0           | 5.388439                | 1.091125  | 5.530302 |
| 19            | 6             | 0           | 4.474400                | -0.015599 | 5.601004 |
| 20            | 1             | 0           | 4.547942                | -0.929718 | 5.029363 |
| 21            | 6             | 0           | 3.450752                | 0.307950  | 6.481939 |
| 22            | 1             | 0           | 2.587825                | -0.305377 | 6.699739 |
| 23            | 6             | 0           | 3.695512                | 1.619145  | 7.015357 |
| 24            | 6             | 0           | 2.961532                | 2.585572  | 7.776717 |
| 25            | 6             | 0           | 6.331180                | 7.427849  | 6.135126 |
| 26            | 6             | 0           | 5.327928                | 8.398175  | 5.952472 |
| 27            | 1             | 0           | 4.286830                | 8.096045  | 5.898602 |
| 28            | 6             | 0           | 5.657902                | 9.741453  | 5.798542 |
| 29            | 1             | 0           | 4.863607                | 10.469440 | 5.651538 |
| 30            | 6             | 0           | 6.993620                | 10.171787 | 5.818079 |
| 31            | 6             | 0           | 7.990805                | 9.203026  | 5.999406 |
| 32            | 1             | 0           | 9.033922                | 9.508255  | 6.030778 |
| 33            | 6             | 0           | 7.671071                | 7.855692  | 6.152592 |
| 34            | 1             | 0           | 8.464223                | 7.132735  | 6.318216 |
| 35            | 6             | 0           | 7.050799                | 0.593376  | 3.677929 |

|    |   |   |           |           |           |
|----|---|---|-----------|-----------|-----------|
| 36 | 6 | 0 | 8.445340  | 0.472980  | 3.544478  |
| 37 | 1 | 0 | 9.099231  | 1.032635  | 4.207324  |
| 38 | 6 | 0 | 8.998461  | -0.382897 | 2.593935  |
| 39 | 1 | 0 | 10.079904 | -0.468374 | 2.521123  |
| 40 | 6 | 0 | 8.187589  | -1.140857 | 1.738270  |
| 41 | 6 | 0 | 6.795685  | -1.011858 | 1.868776  |
| 42 | 1 | 0 | 6.142279  | -1.579586 | 1.210394  |
| 43 | 6 | 0 | 6.233325  | -0.163802 | 2.818277  |
| 44 | 1 | 0 | 5.153607  | -0.064966 | 2.873867  |
| 45 | 6 | 0 | 1.684877  | 2.196846  | 8.412358  |
| 46 | 6 | 0 | 1.580971  | 0.976967  | 9.109323  |
| 47 | 1 | 0 | 2.453534  | 0.337563  | 9.204556  |
| 48 | 6 | 0 | 0.383220  | 0.597179  | 9.706068  |
| 49 | 1 | 0 | 0.333790  | -0.345991 | 10.245271 |
| 50 | 6 | 0 | -0.757444 | 1.412624  | 9.633620  |
| 51 | 6 | 0 | -0.651439 | 2.625216  | 8.939274  |
| 52 | 1 | 0 | -1.521878 | 3.271436  | 8.857330  |
| 53 | 6 | 0 | 0.543570  | 3.014345  | 8.336777  |
| 54 | 1 | 0 | 0.577631  | 3.942574  | 7.775512  |
| 55 | 6 | 0 | 6.861430  | 2.795157  | 8.607566  |
| 56 | 6 | 0 | 7.867349  | 1.865172  | 8.449243  |
| 57 | 1 | 0 | 8.061022  | 1.363864  | 7.505308  |
| 58 | 6 | 0 | 8.649612  | 1.584249  | 9.579695  |
| 59 | 1 | 0 | 9.454018  | 0.855978  | 9.497523  |
| 60 | 6 | 0 | 8.415250  | 2.225746  | 10.806390 |
| 61 | 6 | 0 | 7.377658  | 3.165053  | 10.888959 |
| 62 | 1 | 0 | 7.187440  | 3.676460  | 11.830244 |
| 63 | 6 | 0 | 6.576287  | 3.468588  | 9.775774  |
| 64 | 1 | 0 | 5.778645  | 4.201794  | 9.853857  |
| 65 | 6 | 0 | 9.251224  | 1.889356  | 12.019532 |
| 66 | 1 | 0 | 9.210940  | 2.688498  | 12.766712 |
| 67 | 1 | 0 | 10.300527 | 1.725524  | 11.750448 |
| 68 | 1 | 0 | 8.894444  | 0.970084  | 12.502897 |
| 69 | 5 | 0 | 5.457824  | 3.254165  | 6.652622  |
| 70 | 6 | 0 | -2.054445 | 0.983251  | 10.272449 |
| 71 | 1 | 0 | -1.915120 | 0.742388  | 11.333477 |
| 72 | 1 | 0 | -2.815469 | 1.766343  | 10.199075 |
| 73 | 1 | 0 | -2.452248 | 0.080880  | 9.790205  |
| 74 | 6 | 0 | 8.786619  | -2.048845 | 0.693324  |
| 75 | 1 | 0 | 8.251709  | -3.003887 | 0.639032  |
| 76 | 1 | 0 | 8.728908  | -1.592972 | -0.304259 |
| 77 | 1 | 0 | 9.841080  | -2.256886 | 0.900749  |
| 78 | 6 | 0 | 7.342727  | 11.625968 | 5.621719  |
| 79 | 1 | 0 | 7.354523  | 11.885867 | 4.554356  |
| 80 | 1 | 0 | 6.610522  | 12.282795 | 6.104175  |
| 81 | 1 | 0 | 8.333348  | 11.857689 | 6.026048  |

---

**TSb**

Zero-point correction= 0.671175 (Hartree/Particle)

Thermal correction to Energy= 0.711942

Thermal correction to Enthalpy= 0.712886

Thermal correction to Gibbs Free Energy= 0.595053

Sum of electronic and zero-point Energies= -2073.080710

Sum of electronic and thermal Energies= -2073.039943



Sum of electronic and thermal Enthalpies= -2073.038999

Sum of electronic and thermal Free Energies= -2073.156832

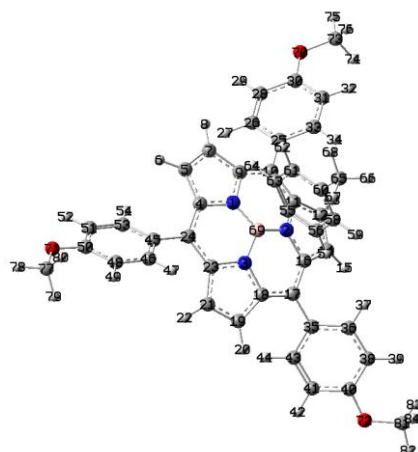

Fig. S104 Optimized structures of TSb.

Table S33 Coordinates of atoms in TSb.

| Center Number | Atomic Number | Atomic Type | Coordinates (Angstroms) |           |          |
|---------------|---------------|-------------|-------------------------|-----------|----------|
|               |               |             | X                       | Y         | Z        |
| 1             | 7             | 0           | 4.565867                | 4.292915  | 7.342683 |
| 2             | 7             | 0           | 6.369733                | 3.659571  | 5.911008 |
| 3             | 7             | 0           | 4.778191                | 2.027518  | 6.642977 |
| 4             | 6             | 0           | 3.375670                | 4.038566  | 7.989204 |
| 5             | 6             | 0           | 2.952942                | 5.331001  | 8.452757 |
| 6             | 1             | 0           | 2.064169                | 5.533166  | 9.033352 |
| 7             | 6             | 0           | 3.858404                | 6.286476  | 8.003641 |
| 8             | 1             | 0           | 3.786944                | 7.350773  | 8.178029 |
| 9             | 6             | 0           | 4.885143                | 5.629538  | 7.244551 |
| 10            | 6             | 0           | 5.987634                | 6.002472  | 6.407706 |
| 11            | 6             | 0           | 6.686173                | 4.982951  | 5.681032 |
| 12            | 6             | 0           | 7.554049                | 4.944000  | 4.538203 |
| 13            | 1             | 0           | 7.998897                | 5.806419  | 4.061794 |
| 14            | 6             | 0           | 7.658352                | 3.629826  | 4.100766 |
| 15            | 1             | 0           | 8.198389                | 3.294257  | 3.226324 |
| 16            | 6             | 0           | 6.859216                | 2.795654  | 4.953079 |
| 17            | 6             | 0           | 6.337697                | 1.461963  | 4.887484 |
| 18            | 6             | 0           | 5.242180                | 1.097415  | 5.736628 |
| 19            | 6             | 0           | 4.301501                | 0.016298  | 5.835482 |
| 20            | 1             | 0           | 4.349578                | -0.912569 | 5.285513 |
| 21            | 6             | 0           | 3.288948                | 0.384999  | 6.712369 |
| 22            | 1             | 0           | 2.411693                | -0.201746 | 6.945554 |
| 23            | 6             | 0           | 3.568472                | 1.699827  | 7.216430 |
| 24            | 6             | 0           | 2.861141                | 2.699745  | 7.961737 |
| 25            | 6             | 0           | 6.350948                | 7.418289  | 6.210187 |
| 26            | 6             | 0           | 5.368762                | 8.415161  | 6.025744 |
| 27            | 1             | 0           | 4.319345                | 8.141098  | 5.993036 |
| 28            | 6             | 0           | 5.722095                | 9.741415  | 5.836187 |
| 29            | 1             | 0           | 4.964163                | 10.502616 | 5.678158 |
| 30            | 6             | 0           | 7.075621                | 10.122761 | 5.826077 |
| 31            | 6             | 0           | 8.067115                | 9.147244  | 6.007158 |

|    |   |   |            |            |            |
|----|---|---|------------|------------|------------|
| 32 | 1 | 0 | 9. 118034  | 9. 412477  | 6. 015548  |
| 33 | 6 | 0 | 7. 699096  | 7. 815557  | 6. 192801  |
| 34 | 1 | 0 | 8. 478004  | 7. 076769  | 6. 355756  |
| 35 | 6 | 0 | 6. 871089  | 0. 525450  | 3. 877746  |
| 36 | 6 | 0 | 8. 258199  | 0. 379811  | 3. 706523  |
| 37 | 1 | 0 | 8. 938186  | 0. 944593  | 4. 337741  |
| 38 | 6 | 0 | 8. 790647  | -0. 499839 | 2. 765000  |
| 39 | 1 | 0 | 9. 866779  | -0. 594636 | 2. 676664  |
| 40 | 6 | 0 | 7. 929183  | -1. 256205 | 1. 956980  |
| 41 | 6 | 0 | 6. 538375  | -1. 112115 | 2. 106613  |
| 42 | 1 | 0 | 5. 881155  | -1. 687889 | 1. 461992  |
| 43 | 6 | 0 | 6. 021187  | -0. 239387 | 3. 050947  |
| 44 | 1 | 0 | 4. 944881  | -0. 121142 | 3. 125745  |
| 45 | 6 | 0 | 1. 582896  | 2. 357331  | 8. 613618  |
| 46 | 6 | 0 | 1. 442807  | 1. 152217  | 9. 324133  |
| 47 | 1 | 0 | 2. 292947  | 0. 483409  | 9. 417858  |
| 48 | 6 | 0 | 0. 246522  | 0. 806070  | 9. 949701  |
| 49 | 1 | 0 | 0. 184882  | -0. 125669 | 10. 499520 |
| 50 | 6 | 0 | -0. 854259 | 1. 671505  | 9. 871055  |
| 51 | 6 | 0 | -0. 733308 | 2. 878841  | 9. 160284  |
| 52 | 1 | 0 | -1. 596860 | 3. 533415  | 9. 091242  |
| 53 | 6 | 0 | 0. 462035  | 3. 212698  | 8. 543902  |
| 54 | 1 | 0 | 0. 517720  | 4. 131911  | 7. 970135  |
| 55 | 6 | 0 | 6. 771866  | 2. 834018  | 8. 783906  |
| 56 | 6 | 0 | 7. 783771  | 1. 907003  | 8. 641041  |
| 57 | 1 | 0 | 7. 986898  | 1. 399920  | 7. 702079  |
| 58 | 6 | 0 | 8. 557680  | 1. 636134  | 9. 778996  |
| 59 | 1 | 0 | 9. 365198  | 0. 909880  | 9. 708489  |
| 60 | 6 | 0 | 8. 310719  | 2. 284899  | 10. 999991 |
| 61 | 6 | 0 | 7. 267851  | 3. 218588  | 11. 068307 |
| 62 | 1 | 0 | 7. 066389  | 3. 733096  | 12. 005530 |
| 63 | 6 | 0 | 6. 474806  | 3. 512384  | 9. 945923  |
| 64 | 1 | 0 | 5. 672361  | 4. 241388  | 10. 013861 |
| 65 | 6 | 0 | 9. 144248  | 1. 964364  | 12. 219120 |
| 66 | 1 | 0 | 10. 214992 | 1. 965125  | 11. 984392 |
| 67 | 1 | 0 | 8. 902626  | 0. 968838  | 12. 613821 |
| 68 | 1 | 0 | 8. 971982  | 2. 689071  | 13. 021121 |
| 69 | 5 | 0 | 5. 368406  | 3. 282388  | 6. 810198  |
| 70 | 8 | 0 | 7. 314319  | 11. 442423 | 5. 632420  |
| 71 | 8 | 0 | -2. 062981 | 1. 436358  | 10. 436578 |
| 72 | 8 | 0 | 8. 332803  | -2. 139956 | 1. 011819  |
| 73 | 6 | 0 | 8. 669039  | 11. 891163 | 5. 556604  |
| 74 | 1 | 0 | 9. 203659  | 11. 405800 | 4. 731640  |
| 75 | 1 | 0 | 8. 614019  | 12. 965342 | 5. 370571  |
| 76 | 1 | 0 | 9. 202975  | 11. 712540 | 6. 497519  |
| 77 | 6 | 0 | -2. 264848 | 0. 204129  | 11. 132498 |
| 78 | 1 | 0 | -3. 299813 | 0. 226293  | 11. 478016 |
| 79 | 1 | 0 | -2. 120121 | -0. 655931 | 10. 468223 |
| 80 | 1 | 0 | -1. 594898 | 0. 118740  | 11. 996199 |
| 81 | 6 | 0 | 9. 734065  | -2. 328147 | 0. 804308  |
| 82 | 1 | 0 | 9. 816931  | -3. 071158 | 0. 009038  |
| 83 | 1 | 0 | 10. 219143 | -1. 398004 | 0. 485003  |
| 84 | 1 | 0 | 10. 223511 | -2. 707892 | 1. 709021  |

TSc

Zero-point correction= 1.307789 (Hartree/Particle)  
 Thermal correction to Energy= 1.377776  
 Thermal correction to Enthalpy= 1.378720  
 Thermal correction to Gibbs Free Energy= 1.190634  
 Sum of electronic and zero-point Energies= -2838.464309  
 Sum of electronic and thermal Energies= -2838.394322  
 Sum of electronic and thermal Enthalpies= -2838.393378  
 Sum of electronic and thermal Free Energies= -2838.581464

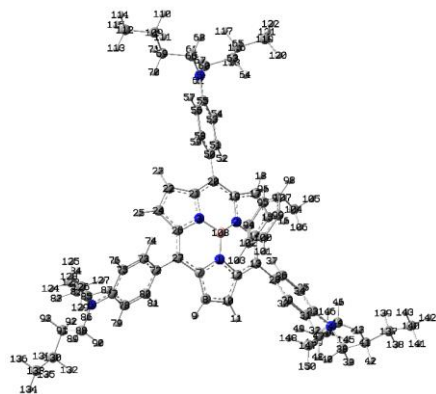

Fig. S105 Optimized structures of TSc.

Table S34 Coordinates of atoms in TSc.

| Center Number | Atomic Number | Atomic Type | Coordinates (Angstroms) |           |           |
|---------------|---------------|-------------|-------------------------|-----------|-----------|
|               |               |             | X                       | Y         | Z         |
| 1             | 7             | 0           | 23.519271               | 13.327659 | 4.770280  |
| 2             | 7             | 0           | 24.620467               | 15.042620 | 6.002002  |
| 3             | 7             | 0           | 22.237943               | 14.882346 | 6.065420  |
| 4             | 7             | 0           | 30.923195               | 11.799124 | 2.442449  |
| 5             | 7             | 0           | 22.978206               | 21.648771 | 10.080696 |
| 6             | 7             | 0           | 16.204772               | 11.589162 | 2.193720  |
| 7             | 6             | 0           | 22.390841               | 12.830855 | 4.150071  |
| 8             | 6             | 0           | 22.912588               | 11.934400 | 3.157643  |
| 9             | 1             | 0           | 22.326731               | 11.330566 | 2.479734  |
| 10            | 6             | 0           | 24.302485               | 12.005744 | 3.173858  |
| 11            | 1             | 0           | 24.966926               | 11.484010 | 2.499369  |
| 12            | 6             | 0           | 24.707305               | 12.925576 | 4.195621  |
| 13            | 6             | 0           | 25.928119               | 13.561895 | 4.606716  |
| 14            | 6             | 0           | 25.857487               | 14.669983 | 5.518589  |
| 15            | 6             | 0           | 26.751694               | 15.636772 | 6.084645  |
| 16            | 1             | 0           | 27.824202               | 15.657649 | 5.953290  |
| 17            | 6             | 0           | 26.010051               | 16.562435 | 6.814314  |
| 18            | 1             | 0           | 26.418589               | 17.413046 | 7.340653  |
| 19            | 6             | 0           | 24.620964               | 16.212096 | 6.732983  |
| 20            | 6             | 0           | 23.351967               | 16.773717 | 7.114658  |
| 21            | 6             | 0           | 22.146983               | 16.111826 | 6.686409  |
| 22            | 6             | 0           | 20.770027               | 16.477790 | 6.535382  |
| 23            | 1             | 0           | 20.323830               | 17.397954 | 6.885396  |
| 24            | 6             | 0           | 20.123686               | 15.495785 | 5.791139  |
| 25            | 1             | 0           | 19.092237               | 15.525426 | 5.469269  |
| 26            | 6             | 0           | 21.071857               | 14.478021 | 5.447475  |

|    |   |   |            |            |            |
|----|---|---|------------|------------|------------|
| 27 | 6 | 0 | 21. 113030 | 13. 380271 | 4. 517897  |
| 28 | 6 | 0 | 27. 210946 | 13. 118518 | 4. 045543  |
| 29 | 6 | 0 | 27. 508444 | 11. 748712 | 3. 893596  |
| 30 | 1 | 0 | 26. 790408 | 11. 006198 | 4. 229500  |
| 31 | 6 | 0 | 28. 717337 | 11. 310844 | 3. 376178  |
| 32 | 1 | 0 | 28. 891226 | 10. 243679 | 3. 320450  |
| 33 | 6 | 0 | 29. 719880 | 12. 226526 | 2. 953654  |
| 34 | 6 | 0 | 29. 408838 | 13. 607637 | 3. 090756  |
| 35 | 1 | 0 | 30. 107237 | 14. 362873 | 2. 752941  |
| 36 | 6 | 0 | 28. 201798 | 14. 029075 | 3. 624658  |
| 37 | 1 | 0 | 28. 005149 | 15. 095816 | 3. 671074  |
| 38 | 6 | 0 | 31. 184808 | 10. 375703 | 2. 192999  |
| 39 | 1 | 0 | 31. 949719 | 10. 323162 | 1. 411623  |
| 40 | 1 | 0 | 30. 286794 | 9. 909690  | 1. 770976  |
| 41 | 6 | 0 | 31. 658792 | 9. 574759  | 3. 419110  |
| 42 | 1 | 0 | 31. 728276 | 8. 521592  | 3. 110212  |
| 43 | 1 | 0 | 30. 894168 | 9. 615722  | 4. 205736  |
| 44 | 6 | 0 | 31. 934769 | 12. 750262 | 1. 968024  |
| 45 | 1 | 0 | 32. 901943 | 12. 242189 | 2. 015605  |
| 46 | 1 | 0 | 32. 000810 | 13. 591043 | 2. 666906  |
| 47 | 6 | 0 | 31. 697108 | 13. 258114 | 0. 536793  |
| 48 | 1 | 0 | 31. 651725 | 12. 396330 | -0. 143578 |
| 49 | 1 | 0 | 30. 718649 | 13. 752862 | 0. 480017  |
| 50 | 6 | 0 | 23. 261480 | 18. 032646 | 7. 860069  |
| 51 | 6 | 0 | 24. 153424 | 19. 106003 | 7. 650550  |
| 52 | 1 | 0 | 24. 912585 | 19. 032248 | 6. 878589  |
| 53 | 6 | 0 | 24. 067046 | 20. 286916 | 8. 368119  |
| 54 | 1 | 0 | 24. 785692 | 21. 067684 | 8. 151861  |
| 55 | 6 | 0 | 23. 067577 | 20. 482966 | 9. 361725  |
| 56 | 6 | 0 | 22. 163917 | 19. 403747 | 9. 566199  |
| 57 | 1 | 0 | 21. 374756 | 19. 482424 | 10. 303720 |
| 58 | 6 | 0 | 22. 265242 | 18. 228322 | 8. 841219  |
| 59 | 1 | 0 | 21. 569046 | 17. 424942 | 9. 063353  |
| 60 | 6 | 0 | 23. 858056 | 22. 793032 | 9. 822268  |
| 61 | 1 | 0 | 23. 304099 | 23. 694783 | 10. 104405 |
| 62 | 1 | 0 | 24. 043928 | 22. 877508 | 8. 746610  |
| 63 | 6 | 0 | 25. 183578 | 22. 742609 | 10. 596431 |
| 64 | 1 | 0 | 25. 731891 | 21. 831603 | 10. 321935 |
| 65 | 1 | 0 | 24. 964162 | 22. 663632 | 11. 670283 |
| 66 | 6 | 0 | 22. 003925 | 21. 820003 | 11. 163011 |
| 67 | 1 | 0 | 21. 893795 | 20. 877158 | 11. 708827 |
| 68 | 1 | 0 | 22. 434566 | 22. 533235 | 11. 873983 |
| 69 | 6 | 0 | 20. 632885 | 22. 329596 | 10. 692925 |
| 70 | 1 | 0 | 20. 208847 | 21. 620050 | 9. 969864  |
| 71 | 1 | 0 | 20. 770230 | 23. 278628 | 10. 156417 |
| 72 | 6 | 0 | 19. 864182 | 12. 910476 | 3. 907539  |
| 73 | 6 | 0 | 18. 683597 | 12. 795211 | 4. 672146  |
| 74 | 1 | 0 | 18. 713698 | 13. 014686 | 5. 735433  |
| 75 | 6 | 0 | 17. 489996 | 12. 354981 | 4. 124408  |
| 76 | 1 | 0 | 16. 634190 | 12. 249841 | 4. 779693  |
| 77 | 6 | 0 | 17. 387819 | 12. 010778 | 2. 748303  |
| 78 | 6 | 0 | 18. 577689 | 12. 132084 | 1. 977867  |
| 79 | 1 | 0 | 18. 565416 | 11. 921734 | 0. 915492  |
| 80 | 6 | 0 | 19. 765808 | 12. 563931 | 2. 543580  |
| 81 | 1 | 0 | 20. 626594 | 12. 687203 | 1. 894516  |
| 82 | 6 | 0 | 14. 946886 | 11. 608356 | 2. 945851  |
| 83 | 1 | 0 | 14. 139988 | 11. 766809 | 2. 221567  |

|     |   |   |            |            |            |
|-----|---|---|------------|------------|------------|
| 84  | 1 | 0 | 14. 934667 | 12. 479375 | 3. 609293  |
| 85  | 6 | 0 | 14. 672640 | 10. 324409 | 3. 743934  |
| 86  | 1 | 0 | 14. 668072 | 9. 469284  | 3. 053784  |
| 87  | 1 | 0 | 15. 494960 | 10. 151431 | 4. 450714  |
| 88  | 6 | 0 | 16. 121858 | 11. 101201 | 0. 813546  |
| 89  | 1 | 0 | 15. 304109 | 10. 374976 | 0. 782597  |
| 90  | 1 | 0 | 17. 032654 | 10. 543809 | 0. 569902  |
| 91  | 6 | 0 | 15. 882930 | 12. 211088 | -0. 224092 |
| 92  | 1 | 0 | 16. 692776 | 12. 947272 | -0. 147205 |
| 93  | 1 | 0 | 14. 954296 | 12. 742263 | 0. 027880  |
| 94  | 6 | 0 | 23. 615886 | 12. 747498 | 7. 757786  |
| 95  | 6 | 0 | 24. 118447 | 13. 264982 | 8. 933889  |
| 96  | 1 | 0 | 24. 493196 | 14. 281616 | 9. 012968  |
| 97  | 6 | 0 | 24. 135703 | 12. 411406 | 10. 048006 |
| 98  | 1 | 0 | 24. 527659 | 12. 783048 | 10. 992769 |
| 99  | 6 | 0 | 23. 663743 | 11. 092654 | 9. 963491  |
| 100 | 6 | 0 | 23. 171537 | 10. 631094 | 8. 733596  |
| 101 | 1 | 0 | 22. 809045 | 9. 608557  | 8. 648679  |
| 102 | 6 | 0 | 23. 141476 | 11. 461872 | 7. 601923  |
| 103 | 1 | 0 | 22. 762740 | 11. 088118 | 6. 654737  |
| 104 | 6 | 0 | 23. 664170 | 10. 196504 | 11. 180807 |
| 105 | 1 | 0 | 24. 511703 | 10. 416748 | 11. 838839 |
| 106 | 1 | 0 | 23. 714902 | 9. 139390  | 10. 899639 |
| 107 | 1 | 0 | 22. 749053 | 10. 332885 | 11. 772832 |
| 108 | 5 | 0 | 23. 468595 | 14. 287960 | 5. 780616  |
| 109 | 6 | 0 | 19. 652631 | 22. 530890 | 11. 855310 |
| 110 | 1 | 0 | 20. 083153 | 23. 241175 | 12. 575679 |
| 111 | 1 | 0 | 19. 530209 | 21. 581653 | 12. 396372 |
| 112 | 6 | 0 | 18. 281307 | 23. 036879 | 11. 398834 |
| 113 | 1 | 0 | 17. 808594 | 22. 331459 | 10. 703759 |
| 114 | 1 | 0 | 17. 602801 | 23. 170814 | 12. 249832 |
| 115 | 1 | 0 | 18. 365211 | 24. 002652 | 10. 884651 |
| 116 | 6 | 0 | 26. 063144 | 23. 972971 | 10. 340758 |
| 117 | 1 | 0 | 25. 500545 | 24. 882123 | 10. 597217 |
| 118 | 1 | 0 | 26. 287259 | 24. 043649 | 9. 266825  |
| 119 | 6 | 0 | 27. 373408 | 23. 945863 | 11. 132632 |
| 120 | 1 | 0 | 27. 974608 | 23. 063643 | 10. 878343 |
| 121 | 1 | 0 | 27. 982032 | 24. 834191 | 10. 924969 |
| 122 | 1 | 0 | 27. 184509 | 23. 917524 | 12. 213272 |
| 123 | 6 | 0 | 13. 341300 | 10. 383016 | 4. 503579  |
| 124 | 1 | 0 | 12. 523212 | 10. 562209 | 3. 791393  |
| 125 | 1 | 0 | 13. 349778 | 11. 246637 | 5. 183897  |
| 126 | 6 | 0 | 13. 050011 | 9. 110149  | 5. 303421  |
| 127 | 1 | 0 | 13. 835565 | 8. 917507  | 6. 045118  |
| 128 | 1 | 0 | 12. 097382 | 9. 187967  | 5. 841039  |
| 129 | 1 | 0 | 12. 990848 | 8. 232192  | 4. 647779  |
| 130 | 6 | 0 | 15. 804975 | 11. 693629 | -1. 670183 |
| 131 | 1 | 0 | 15. 805707 | 12. 558546 | -2. 346326 |
| 132 | 1 | 0 | 16. 717828 | 11. 125819 | -1. 901903 |
| 133 | 6 | 0 | 14. 575274 | 10. 829690 | -1. 973059 |
| 134 | 1 | 0 | 14. 551614 | 10. 541381 | -3. 030871 |
| 135 | 1 | 0 | 14. 562649 | 9. 905289  | -1. 383536 |
| 136 | 1 | 0 | 13. 647052 | 11. 374644 | -1. 757524 |
| 137 | 6 | 0 | 33. 004796 | 10. 023588 | 4. 001483  |
| 138 | 1 | 0 | 33. 777430 | 9. 968707  | 3. 221030  |
| 139 | 1 | 0 | 32. 939862 | 11. 077499 | 4. 302839  |
| 140 | 6 | 0 | 33. 437011 | 9. 180833  | 5. 205364  |

|     |   |   |           |           |           |
|-----|---|---|-----------|-----------|-----------|
| 141 | 1 | 0 | 33.546855 | 8.123242  | 4.933245  |
| 142 | 1 | 0 | 34.399045 | 9.522078  | 5.606323  |
| 143 | 1 | 0 | 32.699516 | 9.238880  | 6.016107  |
| 144 | 6 | 0 | 32.793386 | 14.224996 | 0.071585  |
| 145 | 1 | 0 | 33.769991 | 13.724185 | 0.135317  |
| 146 | 1 | 0 | 32.841612 | 15.079075 | 0.762183  |
| 147 | 6 | 0 | 32.576103 | 14.736791 | -1.355182 |
| 148 | 1 | 0 | 31.622394 | 15.272143 | -1.445272 |
| 149 | 1 | 0 | 33.373889 | 15.426412 | -1.656134 |
| 150 | 1 | 0 | 32.561499 | 13.910408 | -2.077135 |

### TSd

|                                              |                             |
|----------------------------------------------|-----------------------------|
| Zero-point correction=                       | 1.304255 (Hartree/Particle) |
| Thermal correction to Energy=                | 1.376096                    |
| Thermal correction to Enthalpy=              | 1.377040                    |
| Thermal correction to Gibbs Free Energy=     | 1.190274                    |
| Sum of electronic and zero-point Energies=   | -2838.454942                |
| Sum of electronic and thermal Energies=      | -2838.383100                |
| Sum of electronic and thermal Enthalpies=    | -2838.382156                |
| Sum of electronic and thermal Free Energies= | -2838.568923                |

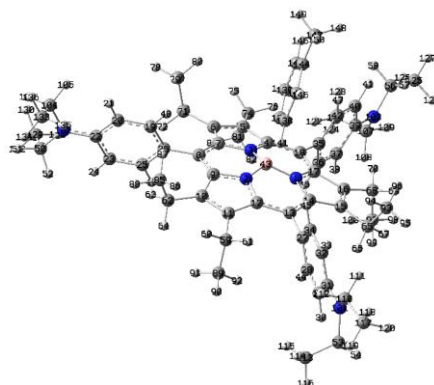

**Fig. S106** Optimized structures of TSd.

**Table S35** Coordinates of atoms in TSd.

| Center Number | Atomic Number | Atomic Type | Coordinates (Angstroms) |           |          |
|---------------|---------------|-------------|-------------------------|-----------|----------|
|               |               |             | X                       | Y         | Z        |
| 1             | 7             | 0           | 4.303876                | 9.332946  | 3.832810 |
| 2             | 7             | 0           | 2.383966                | 10.380258 | 4.798539 |
| 3             | 7             | 0           | 3.278343                | 11.178425 | 2.730090 |
| 4             | 6             | 0           | 4.113633                | 11.056255 | 1.643852 |
| 5             | 6             | 0           | 3.621533                | 12.041555 | 0.701425 |
| 6             | 6             | 0           | 2.492894                | 12.662543 | 1.259852 |
| 7             | 6             | 0           | 2.240243                | 12.066719 | 2.558431 |
| 8             | 6             | 0           | 1.219928                | 12.099074 | 3.562990 |
| 9             | 6             | 0           | 1.272756                | 11.185379 | 4.667902 |
| 10            | 6             | 0           | 0.354340                | 10.694426 | 5.673604 |
| 11            | 6             | 0           | 0.936714                | 9.581162  | 6.299918 |
| 12            | 6             | 0           | 2.239900                | 9.355707  | 5.708980 |

|    |   |   |            |            |            |
|----|---|---|------------|------------|------------|
| 13 | 6 | 0 | 3. 247097  | 8. 332963  | 5. 745604  |
| 14 | 6 | 0 | 4. 291849  | 8. 321634  | 4. 766511  |
| 15 | 6 | 0 | 5. 364422  | 7. 436968  | 4. 348798  |
| 16 | 6 | 0 | 5. 895813  | 7. 926921  | 3. 146327  |
| 17 | 6 | 0 | 5. 183688  | 9. 138534  | 2. 792543  |
| 18 | 6 | 0 | 5. 122330  | 10. 040068 | 1. 683771  |
| 19 | 6 | 0 | -0. 051180 | 14. 155830 | 4. 259380  |
| 20 | 6 | 0 | -1. 127426 | 15. 030781 | 4. 164213  |
| 21 | 1 | 0 | -1. 157957 | 15. 878185 | 4. 838406  |
| 22 | 6 | 0 | -2. 170373 | 14. 819229 | 3. 225104  |
| 23 | 6 | 0 | -2. 055163 | 13. 669082 | 2. 399272  |
| 24 | 1 | 0 | -2. 811450 | 13. 451864 | 1. 654805  |
| 25 | 6 | 0 | -0. 970289 | 12. 805976 | 2. 506087  |
| 26 | 6 | 0 | 0. 059591  | 13. 025499 | 3. 434633  |
| 27 | 6 | 0 | 3. 150030  | 7. 241782  | 6. 757523  |
| 28 | 6 | 0 | 2. 712626  | 5. 952403  | 6. 415834  |
| 29 | 6 | 0 | 2. 605010  | 4. 939665  | 7. 361859  |
| 30 | 1 | 0 | 2. 242811  | 3. 975197  | 7. 028908  |
| 31 | 6 | 0 | 2. 954371  | 5. 152455  | 8. 722023  |
| 32 | 6 | 0 | 3. 373210  | 6. 465515  | 9. 062171  |
| 33 | 1 | 0 | 3. 627563  | 6. 717424  | 10. 083327 |
| 34 | 6 | 0 | 3. 469290  | 7. 470164  | 8. 103436  |
| 35 | 6 | 0 | 6. 088345  | 9. 903725  | 0. 552472  |
| 36 | 6 | 0 | 5. 800265  | 9. 136900  | -0. 585567 |
| 37 | 6 | 0 | 6. 698285  | 9. 031263  | -1. 642327 |
| 38 | 1 | 0 | 6. 408328  | 8. 427658  | -2. 493276 |
| 39 | 6 | 0 | 7. 956412  | 9. 686563  | -1. 616585 |
| 40 | 6 | 0 | 8. 233228  | 10. 468148 | -0. 465060 |
| 41 | 1 | 0 | 9. 159158  | 11. 022133 | -0. 383038 |
| 42 | 6 | 0 | 7. 324716  | 10. 562799 | 0. 585913  |
| 43 | 5 | 0 | 3. 472152  | 10. 458681 | 3. 917633  |
| 44 | 1 | 0 | 2. 436506  | 5. 734427  | 5. 387167  |
| 45 | 1 | 0 | 3. 798728  | 8. 457487  | 8. 417622  |
| 46 | 1 | 0 | 4. 851663  | 8. 611128  | -0. 653227 |
| 47 | 1 | 0 | 7. 584142  | 11. 174343 | 1. 446580  |
| 48 | 1 | 0 | 0. 723984  | 14. 360916 | 4. 993115  |
| 49 | 1 | 0 | -0. 929371 | 11. 936575 | 1. 854571  |
| 50 | 6 | 0 | -4. 372410 | 15. 411447 | 2. 233691  |
| 51 | 1 | 0 | -5. 252493 | 15. 889805 | 2. 676460  |
| 52 | 1 | 0 | -4. 583699 | 14. 337338 | 2. 228862  |
| 53 | 6 | 0 | 2. 190760  | 2. 891327  | 9. 357431  |
| 54 | 1 | 0 | 2. 548542  | 2. 121350  | 10. 042201 |
| 55 | 1 | 0 | 2. 484868  | 2. 550572  | 8. 361115  |
| 56 | 6 | 0 | 10. 111941 | 10. 352497 | -2. 580106 |
| 57 | 1 | 0 | 10. 554865 | 10. 184708 | -1. 592905 |
| 58 | 1 | 0 | 9. 884835  | 11. 429582 | -2. 642576 |
| 59 | 6 | 0 | 0. 238449  | 8. 731311  | 7. 330852  |
| 60 | 1 | 0 | -0. 388851 | 9. 377853  | 7. 954394  |
| 61 | 1 | 0 | 0. 971827  | 8. 274559  | 7. 998653  |
| 62 | 6 | 0 | -1. 008595 | 11. 240964 | 6. 009891  |
| 63 | 1 | 0 | -1. 438302 | 11. 731596 | 5. 133637  |
| 64 | 1 | 0 | -1. 674980 | 10. 408331 | 6. 259437  |
| 65 | 6 | 0 | 5. 888334  | 6. 233652  | 5. 086764  |
| 66 | 1 | 0 | 5. 061855  | 5. 654536  | 5. 505265  |
| 67 | 1 | 0 | 6. 404065  | 5. 574888  | 4. 381665  |
| 68 | 6 | 0 | 6. 983068  | 7. 252820  | 2. 349495  |
| 69 | 1 | 0 | 7. 728478  | 6. 844644  | 3. 041550  |

|     |   |   |            |            |            |
|-----|---|---|------------|------------|------------|
| 70  | 1 | 0 | 7. 503526  | 7. 992055  | 1. 736233  |
| 71  | 6 | 0 | 1. 739020  | 13. 797841 | 0. 619783  |
| 72  | 1 | 0 | 0. 663795  | 13. 666058 | 0. 761694  |
| 73  | 1 | 0 | 1. 914758  | 13. 783694 | -0. 460057 |
| 74  | 6 | 0 | 4. 173978  | 12. 337468 | -0. 669460 |
| 75  | 1 | 0 | 4. 117564  | 13. 417405 | -0. 848392 |
| 76  | 1 | 0 | 5. 233488  | 12. 073648 | -0. 705574 |
| 77  | 6 | 0 | 2. 152069  | 15. 173773 | 1. 176338  |
| 78  | 1 | 0 | 1. 588299  | 15. 969390 | 0. 675426  |
| 79  | 1 | 0 | 1. 952779  | 15. 243747 | 2. 250842  |
| 80  | 1 | 0 | 3. 219959  | 15. 362820 | 1. 016805  |
| 81  | 6 | 0 | 3. 430445  | 11. 607196 | -1. 803466 |
| 82  | 1 | 0 | 3. 484510  | 10. 520753 | -1. 679501 |
| 83  | 1 | 0 | 2. 372021  | 11. 889342 | -1. 831960 |
| 84  | 1 | 0 | 3. 875607  | 11. 859758 | -2. 772902 |
| 85  | 6 | 0 | -0. 990097 | 12. 233298 | 7. 188022  |
| 86  | 1 | 0 | -0. 604803 | 11. 762338 | 8. 099467  |
| 87  | 1 | 0 | -0. 361580 | 13. 102037 | 6. 966937  |
| 88  | 1 | 0 | -2. 004435 | 12. 593506 | 7. 395488  |
| 89  | 6 | 0 | -0. 643060 | 7. 625362  | 6. 719058  |
| 90  | 1 | 0 | -1. 125253 | 7. 044390  | 7. 513908  |
| 91  | 1 | 0 | -1. 429982 | 8. 046742  | 6. 083245  |
| 92  | 1 | 0 | -0. 050522 | 6. 935583  | 6. 109234  |
| 93  | 6 | 0 | 6. 859989  | 6. 611164  | 6. 221419  |
| 94  | 1 | 0 | 6. 368053  | 7. 235888  | 6. 974627  |
| 95  | 1 | 0 | 7. 228183  | 5. 707342  | 6. 720628  |
| 96  | 1 | 0 | 7. 725158  | 7. 163469  | 5. 837032  |
| 97  | 6 | 0 | 6. 467900  | 6. 117316  | 1. 445360  |
| 98  | 1 | 0 | 7. 300800  | 5. 662568  | 0. 896732  |
| 99  | 1 | 0 | 5. 977699  | 5. 331420  | 2. 030980  |
| 100 | 1 | 0 | 5. 744704  | 6. 490493  | 0. 712623  |
| 101 | 7 | 0 | 2. 909341  | 4. 132909  | 9. 662141  |
| 102 | 7 | 0 | -3. 240091 | 15. 682845 | 3. 121747  |
| 103 | 7 | 0 | 8. 876720  | 9. 553817  | -2. 650702 |
| 104 | 6 | 0 | -3. 307317 | 16. 926258 | 3. 892318  |
| 105 | 1 | 0 | -2. 305294 | 17. 359333 | 3. 974413  |
| 106 | 1 | 0 | -3. 896702 | 17. 638767 | 3. 305686  |
| 107 | 6 | 0 | 8. 418835  | 9. 095052  | -3. 967514 |
| 108 | 1 | 0 | 7. 820941  | 8. 188889  | -3. 837651 |
| 109 | 1 | 0 | 9. 295922  | 8. 782695  | -4. 535409 |
| 110 | 6 | 0 | 3. 154113  | 4. 478611  | 11. 072983 |
| 111 | 1 | 0 | 4. 089214  | 5. 046283  | 11. 116680 |
| 112 | 1 | 0 | 2. 362610  | 5. 147339  | 11. 448967 |
| 113 | 6 | 0 | 0. 664559  | 2. 998933  | 9. 454709  |
| 114 | 1 | 0 | 0. 352489  | 3. 277666  | 10. 467984 |
| 115 | 1 | 0 | 0. 268520  | 3. 747990  | 8. 760112  |
| 116 | 1 | 0 | 0. 202219  | 2. 034121  | 9. 212905  |
| 117 | 6 | 0 | 3. 298760  | 3. 289431  | 12. 019765 |
| 118 | 1 | 0 | 3. 583668  | 3. 672670  | 13. 006046 |
| 119 | 1 | 0 | 2. 368718  | 2. 725672  | 12. 144152 |
| 120 | 1 | 0 | 4. 084851  | 2. 600830  | 11. 690090 |
| 121 | 6 | 0 | 7. 632054  | 10. 140783 | -4. 766193 |
| 122 | 1 | 0 | 6. 732055  | 10. 460920 | -4. 229576 |
| 123 | 1 | 0 | 8. 242908  | 11. 029283 | -4. 964159 |
| 124 | 1 | 0 | 7. 320940  | 9. 723823  | -5. 731819 |
| 125 | 6 | 0 | 11. 172332 | 10. 001025 | -3. 621396 |
| 126 | 1 | 0 | 10. 877630 | 10. 268548 | -4. 641050 |



|     |   |   |           |           |           |
|-----|---|---|-----------|-----------|-----------|
| 127 | 1 | 0 | 12.081843 | 10.565294 | -3.386332 |
| 128 | 1 | 0 | 11.424879 | 8.935000  | -3.597888 |
| 129 | 6 | 0 | -4.174217 | 15.925843 | 0.804063  |
| 130 | 1 | 0 | -4.010638 | 17.009826 | 0.797881  |
| 131 | 1 | 0 | -3.311636 | 15.450936 | 0.323900  |
| 132 | 1 | 0 | -5.062932 | 15.713629 | 0.197233  |
| 133 | 6 | 0 | -3.935931 | 16.762407 | 5.280204  |
| 134 | 1 | 0 | -4.957291 | 16.371370 | 5.203197  |
| 135 | 1 | 0 | -3.356231 | 16.073611 | 5.904402  |
| 136 | 1 | 0 | -3.982126 | 17.731059 | 5.792629  |
| 137 | 6 | 0 | 4.815129  | 11.942470 | 5.067695  |
| 138 | 6 | 0 | 4.833436  | 11.839181 | 6.442829  |
| 139 | 6 | 0 | 5.605450  | 12.811313 | 4.339201  |
| 140 | 6 | 0 | 5.738481  | 12.659806 | 7.135924  |
| 141 | 1 | 0 | 4.183293  | 11.160723 | 6.986266  |
| 142 | 6 | 0 | 6.498143  | 13.618782 | 5.057739  |
| 143 | 1 | 0 | 5.552310  | 12.882634 | 3.257254  |
| 144 | 6 | 0 | 6.579232  | 13.552269 | 6.457810  |
| 145 | 1 | 0 | 5.780301  | 12.599358 | 8.221391  |
| 146 | 1 | 0 | 7.137157  | 14.311703 | 4.513498  |
| 147 | 6 | 0 | 7.555299  | 14.427444 | 7.209918  |
| 148 | 1 | 0 | 8.592093  | 14.189999 | 6.939854  |
| 149 | 1 | 0 | 7.399324  | 15.488605 | 6.980495  |
| 150 | 1 | 0 | 7.454708  | 14.298623 | 8.292094  |

---

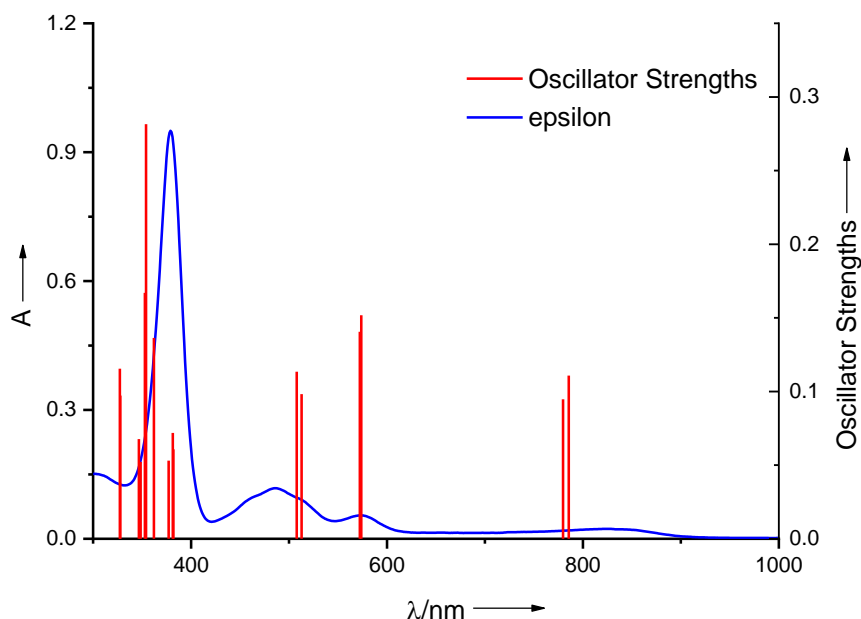

| Wavelength (nm) | Oscillator Strengths | Major Transitions                                                                                                                                                                                                         |
|-----------------|----------------------|---------------------------------------------------------------------------------------------------------------------------------------------------------------------------------------------------------------------------|
| 785.51          | 0.1108               | H <sub>b</sub> -3→L <sub>b</sub> (84.0%), H <sub>a</sub> →L <sub>a</sub> (10.5%)                                                                                                                                          |
| 779.68          | 0.09470              | H <sub>b</sub> -4→L <sub>b</sub> 81.2%, H <sub>a</sub> →L <sub>a</sub> +1 11.0%                                                                                                                                           |
| 573.71          | 0.1518               | H <sub>a</sub> →L <sub>a</sub> (62.9%), H <sub>a</sub> -3→L <sub>a</sub> +1 (15.2%), H <sub>b</sub> -3→L <sub>b</sub> (6.3%), H <sub>b</sub> -10→L <sub>b</sub> (5.9%)                                                    |
| 572.23          | 0.1406               | H <sub>a</sub> →L <sub>a</sub> +1 (61.5%), H <sub>a</sub> -3→L <sub>a</sub> (16.4%), H <sub>b</sub> -4→L <sub>b</sub> (6.8%)                                                                                              |
| 512.86          | 0.09820              | H <sub>a</sub> -3→L <sub>a</sub> 26.4%, H <sub>b</sub> -2→L <sub>b</sub> +1 21.6%, H <sub>a</sub> -1→L <sub>a</sub> 21.0%, H <sub>a</sub> →L <sub>a</sub> +1 15.4%, H <sub>a</sub> -2→L <sub>a</sub> 6.4%                 |
| 507.94          | 0.1134               | H <sub>a</sub> -3→L <sub>a</sub> +1 (35.3%), H <sub>b</sub> -2→L <sub>b</sub> +2 (24.3%), H <sub>a</sub> →L <sub>a</sub> (13.6%), H <sub>a</sub> -1→L <sub>a</sub> +1 (10.2%), H <sub>a</sub> -2→L <sub>a</sub> +1 (7.4%) |
| 381.97          | 0.06080              | H <sub>b</sub> -2→L <sub>b</sub> +1 32.3%, H <sub>b</sub> -13→L <sub>b</sub> 21.9%, H <sub>b</sub> -12→L <sub>b</sub> 12.3%, H <sub>b</sub> -15→L <sub>b</sub> 6.6%, H <sub>a</sub> -3→L <sub>a</sub> 6.5%                |
| 381.37          | 0.07190              | H <sub>a</sub> -4→L <sub>a</sub> +1 19.4%, H <sub>a</sub> -10→L <sub>a</sub> 18.5%, H <sub>a</sub> -5→L <sub>a</sub> 7.8%, H <sub>b</sub> -9→L <sub>b</sub> +1 7.4%, H <sub>a</sub> -9→L <sub>a</sub> 5.0%                |
| 377.17          | 0.05310              | H <sub>b</sub> -2→L <sub>b</sub> +2 16.9%, H <sub>b</sub> -14→L <sub>b</sub> 14.0%, H <sub>a</sub> -11→L <sub>a</sub> +1 9.3%                                                                                             |
| 362.09          | 0.1364               | H <sub>b</sub> -13→L <sub>b</sub> (41.4%), H <sub>b</sub> -2→L <sub>b</sub> +1 (15.2%), H <sub>b</sub> -15→L <sub>b</sub> (8.8%), H <sub>a</sub> -3→L <sub>a</sub> (6.2%)                                                 |
| 354.12          | 0.2815               | H <sub>b</sub> -14→L <sub>b</sub> (34.0%), H <sub>b</sub> -2→L <sub>b</sub> +2 (16.6%), H <sub>a</sub> -3→L <sub>a</sub> +1 (7.6%), H <sub>a</sub> -12→L <sub>a</sub> (7.3%), H <sub>b</sub> -3→L <sub>b</sub> +2 (5.1%)  |
| 352.92          | 0.167                | H <sub>b</sub> -15→L <sub>b</sub> (51.8%), H <sub>b</sub> -4→L <sub>b</sub> +2 (7.6%), H <sub>b</sub> -2→L <sub>b</sub> +1 (6.0%), H <sub>a</sub> -12→L <sub>a</sub> +1 (5.5%)                                            |
| 348.48          | 0.05220              | H <sub>b</sub> -3→L <sub>b</sub> +1 51.6%, H <sub>a</sub> -4→L <sub>a</sub> 35.7%                                                                                                                                         |
| 346.69          | 0.06770              | H <sub>b</sub> -4→L <sub>b</sub> +1 30.9%, H <sub>b</sub> -3→L <sub>b</sub> +2 19.2%, H <sub>a</sub> -5→L <sub>a</sub> 18.4%, H <sub>a</sub> -4→L <sub>a</sub> +1 15.0%                                                   |
| 327.72          | 0.09730              | H <sub>b</sub> -5→L <sub>b</sub> +1 42.6%, H <sub>a</sub> -10→L <sub>a</sub> +1 9.3%, H <sub>b</sub> -5→L <sub>b</sub> +2 9.0%, H <sub>a</sub> -9→L <sub>a</sub> 6.5%, H <sub>b</sub> -16→L <sub>b</sub> 5.1%             |
| 327.38          | 0.1155               | H <sub>b</sub> -5→L <sub>b</sub> +2 (43.9%), H <sub>b</sub> -5→L <sub>b</sub> +1 (14.0%), H <sub>a</sub> -9→L <sub>a</sub> +1 (5.3%), H <sub>a</sub> -10→L <sub>a</sub> +1 (5.2%)                                         |

Fig. S107 Calculated vertical transitions and major transitions of 4a.

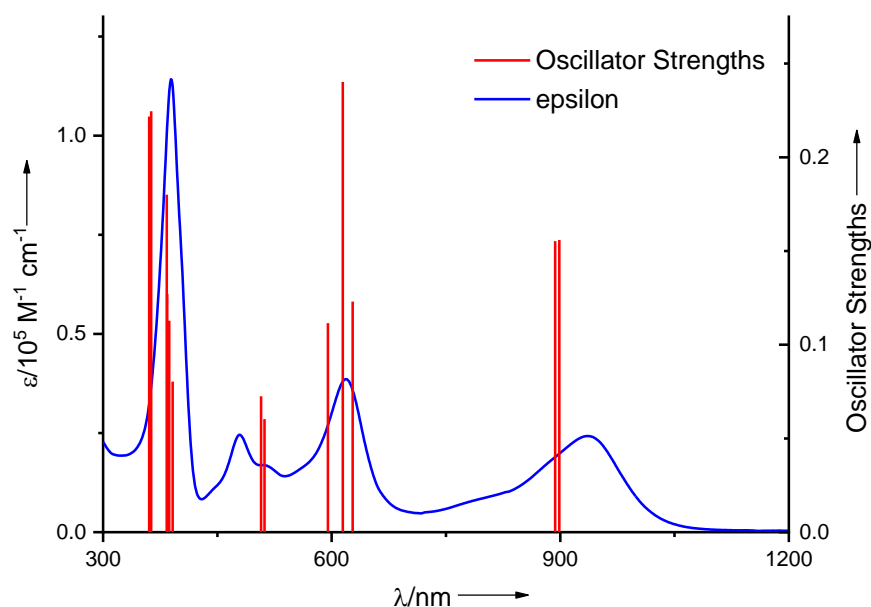

| Wavelength (nm) | Oscillator Strengths | Major Transitions                                                                                                                                                                                                                                                   |
|-----------------|----------------------|---------------------------------------------------------------------------------------------------------------------------------------------------------------------------------------------------------------------------------------------------------------------|
| 898.70          | 0.1559               | H <sub>b</sub> -3→L <sub>b</sub> (69.7%), H <sub>b</sub> -1→L <sub>b</sub> (18.4%), H <sub>a</sub> →L <sub>a</sub> (7.4%)                                                                                                                                           |
| 893.26          | 0.1553               | H <sub>b</sub> -2→L <sub>b</sub> (82.3%), H <sub>a</sub> →L <sub>a</sub> +1 (8.2%), H <sub>b</sub> -4→L <sub>b</sub> (5.0%)                                                                                                                                         |
| 627.55          | 0.1230               | H <sub>b</sub> -6→L <sub>b</sub> (33.0%), H <sub>b</sub> -7→L <sub>b</sub> (28.8%), H <sub>a</sub> →L <sub>a</sub> +1 (24.6%)                                                                                                                                       |
| 614.60          | 0.2402               | H <sub>a</sub> →L <sub>a</sub> (60.3%), H <sub>b</sub> -8→L <sub>b</sub> (13.0%), H <sub>a</sub> -2→L <sub>a</sub> +1 (5.1%)                                                                                                                                        |
| 595.11          | 0.1115               | H <sub>a</sub> →L <sub>a</sub> +1 (46.1%), H <sub>b</sub> -6→L <sub>b</sub> (37.5%)                                                                                                                                                                                 |
| 511.93          | 0.06030              | H <sub>a</sub> -2→L <sub>a</sub> 35.1%, H <sub>b</sub> -4→L <sub>b</sub> +1 23.5%, H <sub>a</sub> -3→L <sub>a</sub> 13.5%, H <sub>a</sub> -1→L <sub>a</sub> 9.1%, H <sub>a</sub> →L <sub>a</sub> +1 6.2%                                                            |
| 507.28          | 0.07250              | H <sub>a</sub> -2→L <sub>a</sub> +1 36.8%, H <sub>b</sub> -4→L <sub>b</sub> +2 26.8%, H <sub>a</sub> -3→L <sub>a</sub> +1 17.9%, H <sub>a</sub> →L <sub>a</sub> 5.8%                                                                                                |
| 391.24          | 0.08030              | H <sub>b</sub> -1→L <sub>b</sub> +2 74.1%, H <sub>a</sub> -4→L <sub>a</sub> +1 8.7%, H <sub>b</sub> -3→L <sub>b</sub> +2 8.6%                                                                                                                                       |
| 386.79          | 0.1128               | H <sub>b</sub> -12→L <sub>b</sub> (27.8%), H <sub>b</sub> -4→L <sub>b</sub> +1 (14.6%), H <sub>b</sub> -2→L <sub>b</sub> +2 (9.6%), H <sub>b</sub> -2→L <sub>b</sub> +1 (5.9%)                                                                                      |
| 384.22          | 0.1271               | H <sub>b</sub> -3→L <sub>b</sub> +1 (11.7%), H <sub>b</sub> -2→L <sub>b</sub> +1 (9.2%), H <sub>a</sub> -4→L <sub>a</sub> (6.8%), H <sub>b</sub> -12→L <sub>b</sub> (6.7%), H <sub>a</sub> -6→L <sub>a</sub> (6.6%), H <sub>a</sub> -6→L <sub>a</sub> +1 (5.2%)     |
| 383.51          | 0.1800               | H <sub>b</sub> -3→L <sub>b</sub> +1 (12.9%), H <sub>b</sub> -2→L <sub>b</sub> +1 (12.3%), H <sub>a</sub> -5→L <sub>a</sub> (10.4%), H <sub>b</sub> -3→L <sub>b</sub> +2 (8.6%), H <sub>a</sub> -8→L <sub>a</sub> (7.1%), H <sub>b</sub> -7→L <sub>b</sub> +1 (6.2%) |
| 363.06          | 0.2246               | H <sub>b</sub> -4→L <sub>b</sub> +1 (36.2%), H <sub>b</sub> -12→L <sub>b</sub> (15.6%), H <sub>a</sub> -2→L <sub>a</sub> (11.3%), H <sub>a</sub> -7→L <sub>a</sub> +1 (9.8%), H <sub>a</sub> -3→L <sub>a</sub> (6.0%)                                               |
| 360.44          | 0.2217               | H <sub>b</sub> -4→L <sub>b</sub> +2 (38.5%), H <sub>b</sub> -13→L <sub>b</sub> (11.8%), H <sub>a</sub> -2→L <sub>a</sub> +1 (8.9%), H <sub>a</sub> -7→L <sub>a</sub> (7.9%), H <sub>a</sub> -3→L <sub>a</sub> +1 (6.8%)                                             |

**Fig. S108** Calculated vertical transitions and major transitions of **4b**.

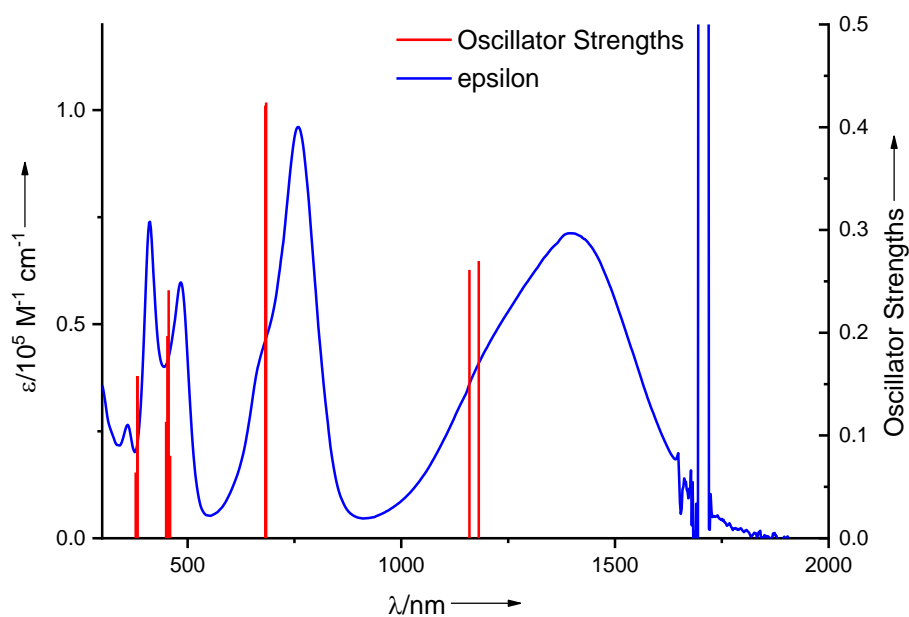

| Wavelength (nm) | Oscillator Strengths | Major Transitions                                                                                                                                                                                                                                                                                          |
|-----------------|----------------------|------------------------------------------------------------------------------------------------------------------------------------------------------------------------------------------------------------------------------------------------------------------------------------------------------------|
| 1181.14         | 0.26980              | H <sub>b</sub> →L <sub>b</sub> (89.6%), H <sub>a</sub> →L <sub>a</sub> (6.5%)                                                                                                                                                                                                                              |
| 1159.49         | 0.26120              | H <sub>b-1</sub> →L <sub>b</sub> (89.2%), H <sub>a</sub> →L <sub>a+1</sub> (6.9%)                                                                                                                                                                                                                          |
| 683.71          | 0.42400              | H <sub>a</sub> →L <sub>a</sub> (53.1%), H <sub>a</sub> →L <sub>a+1</sub> (31.3%)                                                                                                                                                                                                                           |
| 681.64          | 0.42100              | H <sub>a</sub> →L <sub>a+1</sub> (52.2%), H <sub>a</sub> →L <sub>a</sub> (31.6%)                                                                                                                                                                                                                           |
| 458.76          | 0.08020              | H <sub>b</sub> →L <sub>b+2</sub> (37.6%), H <sub>a-1</sub> →L <sub>a+1</sub> (37.1%), H <sub>a-3</sub> →L <sub>a+1</sub> (8.2%), H <sub>b-1</sub> →L <sub>b+1</sub> (5.5%)                                                                                                                                 |
| 455.62          | 0.24130              | H <sub>a-1</sub> →L <sub>a</sub> (32.8%), H <sub>b</sub> →L <sub>b+1</sub> (19.0%), H <sub>a-3</sub> →L <sub>a</sub> (14.6%), H <sub>a-2</sub> →L <sub>a+1</sub> (10.7%), H <sub>b-1</sub> →L <sub>b+2</sub> (8.0%)                                                                                        |
| 452.53          | 0.19680              | H <sub>a-2</sub> →L <sub>a</sub> (57.1%), H <sub>b-1</sub> →L <sub>b+1</sub> (19.6%), H <sub>a-3</sub> →L <sub>a+1</sub> (11.1%)                                                                                                                                                                           |
| 450.74          | 0.10230              | H <sub>a-3</sub> →L <sub>a+1</sub> (40.7%), H <sub>a-3</sub> →L <sub>a</sub> (27.3%), H <sub>a-1</sub> →L <sub>a+1</sub> (6.3%)                                                                                                                                                                            |
| 449.64          | 0.11330              | H <sub>a-3</sub> →L <sub>a</sub> (35.9%), H <sub>a-3</sub> →L <sub>a+1</sub> (24.6%), H <sub>a-2</sub> →L <sub>a+1</sub> (6.7%), H <sub>b-1</sub> →L <sub>b+1</sub> (5.8%), H <sub>b-1</sub> →L <sub>b+2</sub> (5.7%), H <sub>a-1</sub> →L <sub>a+1</sub> (5.1%)                                           |
| 382.92          | 0.15790              | H <sub>b-3</sub> →L <sub>b+1</sub> (22.1%), H <sub>a-8</sub> →L <sub>a</sub> (14.2%), H <sub>a-6</sub> →L <sub>a+1</sub> (14.0%), H <sub>a-4</sub> →L <sub>a</sub> (9.3%), H <sub>b-7</sub> →L <sub>b+1</sub> (7.6%), H <sub>a-7</sub> →L <sub>a+1</sub> (5.8%), H <sub>b-6</sub> →L <sub>b+2</sub> (5.5%) |
| 382.17          | 0.15790              | H <sub>b-3</sub> →L <sub>b+2</sub> (26.0%), H <sub>a-6</sub> →L <sub>a</sub> (14.9%), H <sub>a-4</sub> →L <sub>a+1</sub> (12.4%), H <sub>b-3</sub> →L <sub>b+1</sub> (6.2%)                                                                                                                                |
| 378.40          | 0.06400              | H <sub>a-8</sub> →L <sub>a</sub> (16.2%), H <sub>b-3</sub> →L <sub>b+1</sub> (16.2%), H <sub>b-5</sub> →L <sub>b+1</sub> (15.5%), H <sub>a-7</sub> →L <sub>a+1</sub> (9.5%), H <sub>b-7</sub> →L <sub>b+1</sub> (8.9%), H <sub>a-6</sub> →L <sub>a+1</sub> (6.4%)                                          |

Fig. S109 Calculated vertical transitions and major transitions of 4c.

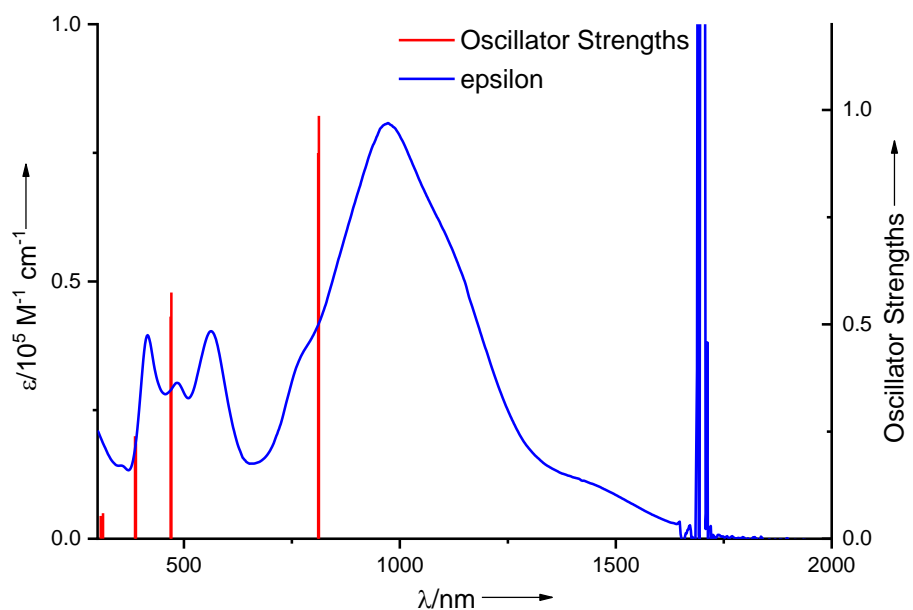

| Wavelength (nm) | Oscillator Strengths | Major Transitions                                                                |
|-----------------|----------------------|----------------------------------------------------------------------------------|
| 812.64          | 0.98630              | H→L (50.7%), H-1→L (26.4%), H-2→L (22.8%)                                        |
| 810.94          | 0.89980              | H-1→L (74.8%), H→L (12.7%), H-2→L (12.2%)                                        |
| 470.72          | 0.57410              | H-1→L+2 (36.5%), H→L+1 (23.1%), H-2→L+1 (20.6%), H-1→L+1 (9.3%), H-2→L+2 (5.0%)  |
| 469.05          | 0.51810              | H-1→L+1 (35.9%), H-2→L+2 (22.5%), H→L+2 (22.4%), H-1→L+2 (8.1%), H-2→L+1 (5.1%)  |
| 388.87          | 0.22230              | H-4→L+1 (70.2%), H-13→L (12.4%), H-12→L (8.0%)                                   |
| 386.86          | 0.23920              | H-4→L+2 (64.4%), H-12→L (18.9%), H-13→L (6.7%)                                   |
| 312.60          | 0.05960              | H-6→L+1 (38.7%), H-30→L (17.5%), H-7→L+1 (9.1%), H-5→L+1 (5.4%)                  |
| 307.33          | 0.05320              | H-6→L+2 (22.2%), H-25→L (15.9%), H-8→L+2 (15.6%), H-26→L (10.9%), H-8→L+1 (9.2%) |

**Fig. S110** Calculated vertical transitions and major transitions of **7c**.

## 10. References

- [1] O. V. Dolomanov, L. J. Bourhis, R. J. Gildea, J. A. K. Howard and H. Puschmann, *J. Appl. Cryst.*, 2009, **42**, 339.
- [2] G. M. Sheldrick, *Acta Cryst.*, 2015, **A71**, 3.
- [3] G. M. Sheldrick, *Acta Cryst.*, 2015, **C71**, 3.
- [4] P. van der Sluis and A. L. Spek, *Acta Cryst.*, 1990, **A46**, 194.
- [5] Gaussian 09, Revision D.01, M. J. Frisch, G. W. Trucks, H. B. Schlegel, G. E. Scuseria, M. A. Robb, J. R. Cheeseman, G. Scalmani, V. Barone, B. Mennucci, G. A. Petersson, H. Nakatsuji, M. Caricato, X. Li, H. P. Hratchian, A. F. Izmaylov, J. Bloino, G. Zheng, J. L. Sonnenberg, M. Hada, M. Ehara, K. Toyota, R. Fukuda, J. Hasegawa, M. Ishida, T. Nakajima, Y. Honda, O. Kitao, H. Nakai, T. Vreven, J. A. Jr. Montgomery, J. E. Peralta, F. Ogliaro, M. Bearpark, J. J. Heyd, E. Brothers, K. N. Kudin, V. N. Staroverov, T. Keith, R. Kobayashi, J. Normand, K. Raghavachari, A. Rendell, J. C. Burant, S. S. Iyengar, J. Tomasi, M. Cossi, N. Rega, J. M. Millam, M. Klene, J. E. Knox, J. B. Cross, V. Bakken, C. Adamo, J. Jaramillo, R. Gomperts, R. E. Stratmann, O. Yazyev, A. J. Austin, R. Cammi, C. Pomelli, J. W. Ochterski, R. L. Martin, K. Morokuma, V. G. Zakrzewski, G. A. Voth, P. Salvador, J. J. Dannenberg, S. Dapprich, A. D. Daniels, O. Farkas, J. B. Foresman, J. V. Ortiz, J. Cioslowski and D. J. Fox, Gaussian, Inc., Wallingford CT, 2013.
- [6] A. D. Becke, *J. Chem. Phys.*, 1993, **98**, 1372.
- [7] C. Lee, W. Yang and R. G. Parr, *Phys. Rev. B*, 1988, **37**, 785.
